# Supplementary material for: Ultrasound-guided superficial cervical plexus block for analgesia in patients undergoing craniotomy via suboccipital retrosigmoid approach: study protocol of a randomised controlled trial
Source: PubMed Central journal article supplement — BMJ Open. 2020 Feb 5;10(2):e034003. doi: 10.1136/bmjopen-2019-034003 (PMC7044881; doi:10.1136/bmjopen-2019-034003), 2020-02-05
Supplement: bmjopen-2019-034003.draft_revisions.pdf [file bmjopen-2019-034003.draft_revisions.pdf]

# BMJ Open

BMJ Open is committed to open peer review. As part of this commitment we make the peer review history of every article we publish publicly available.

When an article is published we post the peer reviewers' comments and the authors' responses online. We also post the versions of the paper that were used during peer review. These are the versions that the peer review comments apply to.

The versions of the paper that follow are the versions that were submitted during the peer review process. They are not the versions of record or the final published versions. They should not be cited or distributed as the published version of this manuscript.

BMJ Open is an open access journal and the full, final, typeset and author-corrected version of record of the manuscript is available on our site with no access controls, subscription charges or pay-per-view fees (<http://bmjopen.bmj.com>).

If you have any questions on BMJ Open's open peer review process please email [info.bmjopen@bmj.com](mailto:info.bmjopen@bmj.com)

# BMJ Open

## Ultrasound guided superficial cervical plexus block for analgesia in patients undergoing craniotomy via suboccipital retrosigmoid approach: study protocol of a randomized controlled trial

|                               |                                                                                                                                                                                                                             |
|-------------------------------|-----------------------------------------------------------------------------------------------------------------------------------------------------------------------------------------------------------------------------|
| Journal:                      | <i>BMJ Open</i>                                                                                                                                                                                                             |
| Manuscript ID                 | bmjopen-2019-034003                                                                                                                                                                                                         |
| Article Type:                 | Protocol                                                                                                                                                                                                                    |
| Date Submitted by the Author: | 01-Sep-2019                                                                                                                                                                                                                 |
| Complete List of Authors:     | Peng, Kun<br>Zeng, Min<br>Dong, Jia<br>Yan, Xiang; Beijing Tiantan Hospital, Anesthesiology<br>Wang, Dexiang<br>Li, Shu; Beijing Tiantan Hospital, Anesthesiology<br>Peng, Yuming; Beijing Tiantan Hospital, Anesthesiology |
| Keywords:                     | craniotomy, analgesia, superficial cervical plexus block, Ultrasound < RADIOLOGY & IMAGING                                                                                                                                  |
|                               |                                                                                                                                                                                                                             |

SCHOLARONE™  
Manuscripts

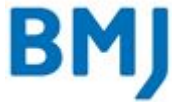

I, the Submitting Author has the right to grant and does grant on behalf of all authors of the Work (as defined in the below author licence), an exclusive licence and/or a non-exclusive licence for contributions from authors who are: i) UK Crown employees; ii) where BMJ has agreed a CC-BY licence shall apply, and/or iii) in accordance with the terms applicable for US Federal Government officers or employees acting as part of their official duties; on a worldwide, perpetual, irrevocable, royalty-free basis to BMJ Publishing Group Ltd ("BMJ") its licensees and where the relevant Journal is co-owned by BMJ to the co-owners of the Journal, to publish the Work in this journal and any other BMJ products and to exploit all rights, as set out in our [licence](#).

The Submitting Author accepts and understands that any supply made under these terms is made by BMJ to the Submitting Author unless you are acting as an employee on behalf of your employer or a postgraduate student of an affiliated institution which is paying any applicable article publishing charge ("APC") for Open Access articles. Where the Submitting Author wishes to make the Work available on an Open Access basis (and intends to pay the relevant APC), the terms of reuse of such Open Access shall be governed by a Creative Commons licence – details of these licences and which [Creative Commons](#) licence will apply to this Work are set out in our licence referred to above.

Other than as permitted in any relevant BMJ Author's Self Archiving Policies, I confirm this Work has not been accepted for publication elsewhere, is not being considered for publication elsewhere and does not duplicate material already published. I confirm all authors consent to publication of this Work and authorise the granting of this licence.

1  
2  
3  
4 **Ultrasound guided superficial cervical plexus block for analgesia in patients**  
5  
6 **undergoing craniotomy via suboccipital retrosigmoid approach: study protocol of**  
7  
8 **a randomized controlled trial**  
9  
10

11  
12  
13  
14 \*Kun Peng, M.D., \*Min Zeng, M.D., Jia Dong, M.D., Xiang Yan, M.D., Dexiang Wang,  
15 M.D., Shu Li, M.D., Ph.D., Yuming Peng§, M.D., Ph.D.

16  
17 Department of Anesthesiology, Beijing Tiantan Hospital, Capital Medical University,  
18 Beijing, PR China.  
19  
20

21  
22  
23  
24  
25  
26 \*Kun Peng and Min Zeng are co-first authors.  
27  
28

29  
30 §Corresponding authors and requests for reprints:

31 Yuming Peng, M.D., Ph.D.

32  
33 Department of Anesthesiology, Beijing Tiantan Hospital, Capital Medical University,  
34 PR China  
35

36 Mailing address: No.119, Nansihuan Xilu, Fengtai District, Beijing, PR China 100070.

37 Phone: 8610-59976658

38 Email: [florapym766@163.com](mailto:florapym766@163.com)  
39  
40

41 Word count: 3338 words  
42  
43  
44  
45  
46

47 Email address:

48  
49 Kun Peng: [13693215761@163.com](mailto:13693215761@163.com)

50 Min Zeng: [fly800727@163.com](mailto:fly800727@163.com)

51 Jia Dong: [dongjia800@hotmail.com](mailto:dongjia800@hotmail.com)

52 Xiang Yan: [yanxiang9991@163.com](mailto:yanxiang9991@163.com)

53 Dexiang Wang: [ttyywdx@163.com](mailto:ttyywdx@163.com)

54 Shu Li: [emilyneuro@gmail.com](mailto:emilyneuro@gmail.com)  
55  
56  
57  
58  
59  
60

## Abstract

**Introduction** Scalp nerve block has been proven to be an alternative choice to opioids in multimodal analgesia. However, for the infratentorial space-occupying craniotomy, especially the suboccipital retrosigmoid craniotomy, scalp nerve block is insufficient.

**Methods and analysis** The study is a prospective, single-center, randomized, paralleled-group controlled trial. Patients scheduled to receive elective suboccipital retrosigmoid craniotomy will be randomly assigned to the superficial cervical plexus block group or the control group. After anesthesia induction, superficial cervical plexus nerve block will be performed under the guidance of ultrasound. The primary outcome is the cumulative consumption of sufentanil by the PCA within 24 hours after surgery. Secondary outcomes include the cumulative consumption of sufentanil at other 5 time points, pain site and NRS pain severity score.

**Keywords** craniotomy, analgesia, superficial cervical plexus block, ultrasound

**Ethics approval and dissemination** The protocol (version number: 2.0, April 10, 2019) has been approved by the Ethics Review Committee of China Registered Clinical Trials (Ethics Review No. ChiECRCT-20190047). The findings of this study will be disseminated in peer-reviewed journals and at scientific conferences.

**Trial registration number** NCT03033693.

## *Article Summary*

### *Strengths and limitations of this study*

- This is the first randomized controlled trial to observe the efficacy and safety of preoperative ultrasound-guided superficial cervical plexus block on postoperative analgesia in patients undergoing craniotomy via suboccipital retrosigmoid approach.
- The results will optimize postoperative analgesia in patients undergoing infratentorial craniotomy, thereby improving the short- and long-term prognosis of the patients.
- This is a single-center clinical trial design which might limit the generalization of the conclusion.

## ***Background***

The procedure of craniotomy was previously assumed to be less painful than other sites of surgeries [1]. It had been believed nerve fiber density was lower in dura, less nerve fiber would be damaged by craniotomy and no nociceptive sensory nerve distributed in brain parenchyma [2]. However, in a prospective study of patients undergoing craniotomy, Gottchalk et al. found that the incidence of postoperative pain was as high as 87%, among of 55% patients experienced moderate to severe pain [3]. Inadequate analgesia after craniotomy leads to enormous catastrophe for patients [4]. Post-craniotomy pain is mainly caused by scalp incision, with enormous free nerve endings. After incision, nociceptors are activated by chemical mediators. These stimulus signals from the anterior scalp or posterior scalp are received by the trigeminal branches or cervical plexus branches, and then transmitted to the trigeminal nucleus and the dorsal horn of the spinal cord. Secondary neurons upload these signals to the thalamus and then project them to the cerebral cortex and form pain perception. The whole process is regulated by a variety of inflammatory mediators, peripheral nerve pathways and central nervous system[5].

The pain severity after craniotomy is closely associated with surgical approach. Gottschalk et al. evaluated postoperative pain in 187 craniotomy patients and found that the infratentorial approach was associated with severe postoperative pain and more perioperative analgesic requirements than the supratentorial approach[3]. The suboccipital retrosigmoid approach is a common approach for infratentorial mass craniotomy and mass located in cerebellopontine angle region. Rimaaja et al. reported

1  
2  
3  
4 that 32% of patients had no or only mild headache prior to removal of the  
5  
6 cerebellopontine angle area mass via a suboccipital approach, while 64% of patients  
7  
8 developed severe headache after craniotomy[6]. The high incidence of postoperative  
9  
10 pain after craniotomy through infratentorial approach, especially suboccipital  
11  
12 retrosigmoid approach may be related to the injury of neck muscles and posterior  
13  
14 occipital muscles by the surgical approach, as well as the special position of the head  
15  
16 and neck during craniotomy, leading to postoperative muscle spasm [7, 8].  
17  
18  
19

20  
21  
22 Apart from that, it has been suggested that inadequately treated acute pain also increases  
23  
24 the risk of postcraniotomy chronic pain, which affects the long-term quality of life of  
25  
26 patients[9]. Schankin's study found that 32% of patients with suboccipital retrosigmoid  
27  
28 craniotomy developed persistent headache syndrome with a severity greater than 6/10  
29  
30 via Visual Analogue Scale (VAS) at 6 months after surgery[10]. It is obvious that  
31  
32 patients undergoing craniotomy via suboccipital retrosigmoid approach suffer severe  
33  
34 acute and chronic pain, with high prevalence and severe adverse effect. Therefore, it is  
35  
36 necessary to explore a compound analgesia model to prevent both acute and chronic  
37  
38 pain.  
39  
40  
41  
42  
43  
44

45  
46 The ideal postoperative analgesia after craniotomy should be a comprehensive  
47  
48 analgesic regimen including multiple time points and multiple modes, to ensure  
49  
50 achievement of an ideal analgesic state after craniotomy with exact analgesic effect and  
51  
52 slight or no interference on respiration recovery or circulation stability. Meanwhile, the  
53  
54 interference on consciousness and postoperative neurological function should be  
55  
56 minimized during the recovery and evaluation period. At present, postoperative patient  
57  
58  
59  
60



1  
2  
3  
4 controlled intravenous analgesia (PCIA) with opioid is the most common analgesia  
5  
6 model for patients received craniotomy. However, various adverse reactions of opioids,  
7  
8 including respiratory depression, nausea, vomiting, pruritus, urinary retention, etc., not  
9  
10 only bring discomfort to patients, but also affect neurological function evaluation by  
11  
12 neurosurgeons[11]. Besides opioids, nonsteroidal anti-inflammatory drugs (NSAIDS)  
13  
14 is another common used analgesia agent in clinical practice, however, NSAIDS is not  
15  
16 suitable for postoperative analgesia after neurosurgery due to its effect on  
17  
18 coagulation[12]. Gabapentin is an adjuvant antiepileptic agent with some analgesic  
19  
20 effects. Our previous research demonstrated that preoperative oral gabapentin relieved  
21  
22 early postoperative pain, with increased depth of sedation in early stage of post-  
23  
24 craniotomy, which indicated gabapentin was not the appropriate candidate for  
25  
26 postoperative neurosurgical analgesia[13].

27  
28 The skin incision is the main source of pain during craniotomy. Scalp nerve block (SNB)  
29  
30 has been proven to be an excellent alternative choice to opioids in this multimodal  
31  
32 analgesia, and widely used in neurosurgical analgesia[14-16]. However, for the  
33  
34 infratentorial space-occupying craniotomy, especially the suboccipital retrosigmoid  
35  
36 craniotomy, the scalp innervation area is insufficient to cover the incision, resulting  
37  
38 defective nerve blockage. Therefore, it is necessary to explore a comprehensive  
39  
40 analgesic model to provide a more ideal analgesic regimen for patients undergoing  
41  
42 suboccipital retrosigmoid craniotomy. The cervical plexus is from the anterior branch  
43  
44 of C1-C4 cervical nerve, divided into by superficial plexus and deep plexus. The  
45  
46 superficial plexus runs from medial to lateral under the sternocleidomastoid muscle and  
47  
48  
49  
50  
51  
52  
53  
54  
55  
56  
57  
58  
59  
60

1  
2  
3  
4 passes through the superficial cervical fascia at the midpoint behind it. The cutaneous  
5  
6 branches of the superficial cervical plexus include the lesser occipital nerve, the greater  
7  
8 auricular nerve, transverse cervical nerve and supraclavicular nerve, innervating the  
9  
10 incision area of the suboccipital sigmoid sinus approach craniotomy [17]. Therefore,  
11  
12 the superficial cervical plexus block (SCPB) is a potential candidate to satisfy the  
13  
14 analgesic requirement of retrosigmoid craniotomy. Francois et al. observed the effect  
15  
16 of transitional analgesia from SCPB before anesthesia recovery after elective  
17  
18 infratentorial or occipital craniotomy in 30 patients [18]. In the control group, 0.1mg/kg  
19  
20 morphine was administered after close of the dura. It was found that the effect of SCPB  
21  
22 on postoperative analgesia was not inferior to administration of morphine after dura  
23  
24 closure. However, the sample size estimation is not sufficient. Second, the superficial  
25  
26 cervical plexus was located not by ultrasound. This kind of method in location was not  
27  
28 only easy to injury the adjacent muscles and vessels, but also unable to determine the  
29  
30 correct anatomical level of the drug. The analgesic effect of SCPB may not be fully  
31  
32 guaranteed. In addition, no related adverse effects were reported in that study. However,  
33  
34 the study provided us a feasible method of SCPB analgesia for suboccipital  
35  
36 retrosigmoid craniotomy. With the continual development of visualization techniques,  
37  
38 ultrasound-guided nerve blocks have become increasingly popular [19-21]. For SCPB,  
39  
40 the blind puncture has the potential to penetrate the prevertebral fascia to become a  
41  
42 deep cervical plexus block. Ultrasound-guided SCPB, the operator can directly see  
43  
44 nerve and adjacent anatomical structure, accurately locate the nerve, avoid accidental  
45  
46 injury during the puncture, and inject the local anesthetic into the correct anatomical  
47  
48  
49  
50  
51  
52  
53  
54  
55  
56  
57  
58  
59  
60

1  
2  
3  
4 level, to avoid the unexpected deep cervical plexus block. It has the advantages of faster  
5  
6 onset of action, less dosage, high success rate, and fewer complications.  
7

8  
9 Therefore, we propose the hypothesis that preoperative ultrasound-guided SCPB safely  
10  
11 and effectively decreases the requirements for postoperative opioids drugs. The results  
12  
13 are expected to optimize postoperative analgesia in patients undergoing infratentorial  
14  
15 craniotomy, thereby improving the short- and long-term prognosis of the patients.  
16  
17  
18

## 19 **Methods**

### 20 **Study design**

21  
22 This is a prospective, single-center, randomized, paralleled-group controlled trial  
23  
24 ( Figure 1 ) being conducted at Beijing Tiantan Hospital, Capital Medical University,  
25  
26 China. The study was approved by the Ethics Review Committee of China Registered  
27  
28 Clinical Trials on April 8, 2019 (No. ChiECRCT-20190047). The study strategy was  
29  
30 registered on the registration website <http://clinicaltrials.gov/> on June 29, 2019 with the  
31  
32 registration number NCT04036812. Preoperative interviews will be conducted by  
33  
34 specially trained research assistants to inform patients of the study purposes, risks and  
35  
36 benefits, and to obtain written informed consent from patients or legal  
37  
38 representatives. The schedule of enrollment and assessments is shown in the Standard  
39  
40 Protocol Items: Recommendations for Interventional Trials (SPIRIT) ( Figure 2).  
41  
42  
43  
44  
45  
46  
47  
48  
49  
50

### 51 **Study population**

### 52 **Inclusion criteria**

1  
2  
3  
4 Patients scheduled to undergo elective suboccipital retrosigmoid craniotomy will  
5  
6 be recruited. Inclusion criteria include age between 18 and 65 years, and American  
7  
8 Society of Anesthesiologists (ASA) physical status I-III.  
9  
10

### 11 **Exclusion criteria**

12  
13  
14 Exclusion criteria include refuse to provide written informed consent, local infection,  
15  
16 preoperative impairment of consciousness and cognitive function, severe hepatic or  
17  
18 renal dysfunction, uncontrolled hypertension, diabetes, severe arrhythmia and unstable  
19  
20 angina pectoris, inability to communicate; allergic to experimental drugs; refuse to  
21  
22 receive post-operative analgesia; history of drug abuse; history of chronic headache;  
23  
24 aphasia and hearing impairment; second craniotomy; body mass index  $< 18.5 \text{ kg/m}^2$  or  
25  
26  $> 30.0 \text{ kg/m}^2$ .  
27  
28  
29  
30  
31  
32

### 33 ***Randomization and blinding***

34  
35  
36 Randomization will be conducted via a computer-generated table by independent  
37  
38 research assistant to ensure the allocation sequence of random codes. Patients will be  
39  
40 randomly assigned to two groups with a 1: 1 ratio. The allocation sequence will be  
41  
42 packed with identical shape and size opaque envelopes and distributed to the  
43  
44 anesthesiologists who will not involve in intraoperative management or postoperative  
45  
46 follow-up. The random allocation form will be sealed in triplicate with opaque  
47  
48 envelopes, and one copy will be kept by the study director, pharmacy nurse and  
49  
50 statistician, respectively. Patients, anesthesiologists responsible for intraoperative  
51  
52 management and outcome assessors will be blinded to the participants' group  
53  
54  
55  
56  
57  
58  
59  
60

1  
2  
3  
4 assignment till end of the study unless specific circumstances, such as the occurrence  
5  
6 of a serious adverse event (SAE).  
7  
8

### 9 ***Intervention***

10  
11 Patients will be randomly assigned to the superficial cervical plexus block group or the  
12  
13 control group. After anesthesia induction, SCPB will be performed under the guidance  
14  
15 of ultrasound (HITACHI company, Noblus). Patients will be at supine position with  
16  
17 ipsilateral shoulder relaxed and slightly elevated while head tilting to the opposite side.  
18  
19

20  
21 After marking the midpoint of the posterior border of clavicular head of the  
22  
23 sternocleidomastoid muscle (about cricoid cartilage level, about 3-4 cm above the  
24  
25 clavicle), an ultrasound probe (50 mm high frequency linear array) warped with  
26  
27 sterilize plastic dress will be placed in the transverse position at the previous measuring  
28  
29 mark. The scanning depth will be 3-4 cm and the focusing position will be 2-3 cm.  
30  
31

32  
33 After confirming the sternocleidomastoid muscle, we move the probe backwards until  
34  
35 the posterior border of the sternocleidomastoid muscle in the center of the screen, and  
36  
37 identify the investing fascia and prevertebral fascia from the shallow to the deep layer.  
38  
39

40  
41 Using long-axis in-plane technique, a 50 mm long, 20G short bevel needle will be  
42  
43 inserted from the lateral border of sternocleidomastoid muscle. Under guidance of  
44  
45 ultrasound, we will confirm the needle tip locating between the deep layer of investing  
46  
47 fascia and the superficial layer of prevertebral fascia, close to the border of  
48  
49 sternocleidomastoid muscle. After negative aspiration of blood and cerebrospinal fluid,  
50  
51 1 ml of 0.5% ropivacaine will be administered to confirm the location of the needle tip.  
52  
53

54  
55 Then, 10-15 mL of 0.5% ropivacaine will be infused on the superficial layer of  
56  
57  
58  
59  
60

1  
2  
3  
4 prevertebral fascia. The puncture site will be covered with opaque infusion dressing  
5  
6 after completing of superficial cervical plexus block.  
7

8  
9 In the control group, ultrasound guidance will be used to determine the location of  
10  
11 superficial cervical plexus nerve, but no puncture will be performed with opaque  
12  
13 infusion dressing used to cover the proposed puncture site.  
14  
15

### 16 17 ***Concomitant treatment***

18  
19 Peripheral venous access will be established upon arrival in operating room. Routine  
20  
21 monitoring will include electrocardiograph (ECG), pulse oxygen saturation,  
22  
23 noninvasive blood pressure (NIBP), body temperature and bispectral index (BIS).  
24  
25

26  
27 Continuous arterial pressure, urine output and end-tidal carbon dioxide partial pressure  
28  
29 (ETCO<sub>2</sub>) will be monitored after anesthesia induction. All patients will be premedicated  
30  
31 with midazolam (0.05 mg/kg) intravenously 5 minutes before anesthesia induction.  
32  
33

34  
35 Anesthesia will be induced with propofol (1.5 to 2.5 mg/kg), sufentanil (0.3 to 0.4 µg/  
36  
37 kg), and rocuronium (0.9 mg/kg) or cisatracurium (0.2 mg/kg). After tracheal intubation,  
38  
39 mechanical ventilation will be performed, at a tidal volume 6-8 ml/kg, a respiratory rate  
40  
41 of 12-15/min, an I:E of 1:2, a 50% fraction of inspired oxygen in the air and fresh gas  
42  
43 at a flow rate of 2 L/min to maintain the ETCO<sub>2</sub> between 35 and 40 mmHg. Local  
44  
45 infiltration anesthesia with 2% lidocaine will be performed at the site of head pins  
46  
47 before placing head holder.  
48  
49  
50  
51

52  
53 Anesthesia will be maintained with total intravenous anesthesia (TIVA). Remifentanil  
54  
55 will be titrated (0.1-0.4 µg/kg/min) immediately after induction to maintain  
56  
57 intraoperative analgesia. During tumor resection (from dura incision to dura suture),  
58  
59  
60

1  
2  
3  
4 the infusion rate of remifentanyl will be adjusted between 0.2 and 0.4  $\mu\text{g}/\text{kg}/\text{min}$ . Along  
5  
6 with the remifentanyl infusion, anesthesia will be maintained with propofol infusion (3-  
7  
8 8 mg/kg/h) to keep BIS values between 40 and 50. No muscle relaxant will be used  
9  
10 during the procedure to meet intraoperative electronic physiological neuro-  
11  
12 monitoring requirements. No additional local anesthetics or analgesics will be  
13  
14 administered intraoperatively. Propofol and remifentanyl infusion will be discontinued  
15  
16 at the end of surgery.  
17  
18  
19  
20  
21

22 The patients will be extubated after full recovery from anesthesia and transferred to the  
23  
24 post-anesthesia care unit (PACU). The patients will remain in the PACU for 120  
25  
26 minutes and receive nasal oxygen inhalation with ECG, NIBP, pulse oximetry  
27  
28 monitoring. Sufentanyl-loaded electric analgesia pumps (Rhythmic Plus, Micrel  
29  
30 Medical Devices S.A., Greece-European Union) which pre-programmed by the  
31  
32 research assistant will be connected to the patients for routine postoperative analgesia.  
33  
34  
35  
36  
37  
38 The PCA electric pumps will be filled with sufentanyl (100  $\mu\text{g}$ ) and ondansetron (16  
39  
40 mg) diluted in 100 mL of 0.9% saline. This regimen will provide a bolus of 1  $\mu\text{g}$   
41  
42 sufentanyl on demand with a 15-minute lockout time, without continuous background  
43  
44 infusion dose or loading dose. Insufficient postoperative analgesia will be defined as  
45  
46 an NRS score  $>40$  over 15 minutes or  $> 60$ . Once inadequate postoperative analgesia  
47  
48 was confirmed, patients will receive intravenous tramadol (50 mg). If the patient  
49  
50 vomited or reported nausea for more than 15 minutes, ondansetron 8 mg will be  
51  
52 administered intravenously.  
53  
54  
55  
56  
57  
58  
59  
60

1  
2  
3  
4 Physiologic parameters, the total doses of anesthetic drugs and vasoactive drugs will  
5  
6 be recorded. Fluid input and output will also be closely monitored and recorded.  
7  
8  
9 Anesthesia and surgery duration will be summarized.

### 10 11 ***Outcomes and safety measures***

12  
13  
14 The aim of this study is to observe the effect of SCPB on postoperative analgesia in  
15  
16 patients with suboccipital retrosigmoid craniotomy.  
17

### 18 19 ***Primary outcome***

20  
21  
22 The primary outcome is the cumulative consumption of sufentanil by the PCA within  
23  
24 24 hours after surgery. The primary outcomes will be assessed by trained research  
25  
26 assistants at 24 hours after surgery through reading the PCA data. During preoperative  
27  
28 visits, patients will be informed of NRS pain score, analgesic satisfaction score, sleep  
29  
30 quality score and other criteria. They also will be familiarized with the PCA pump,  
31  
32 follow-up visit and criteria for chronic pain.  
33  
34  
35  
36

### 37 38 ***Secondary outcomes***

39  
40  
41 The secondary outcomes include the other efficacy parameters and safety outcomes.

42  
43  
44 1) The first-time point that the patients use PCA, the total and effective requests of PCA  
45  
46 at 6 different time-point after surgery and the cumulative consumption of sufentanil at  
47  
48 other 5 time-points after surgery, except 24 hours after surgery.

49  
50  
51 2) Pain site and NRS pain severity score. Pain will be assessed at 6 time-points after  
52  
53 surgery. The surgical incision pain as well as head and neck pain will be assessed at  
54  
55 rest and on movement. If patients report pain in one or more of the above three sites,  
56  
57 NRS (0-10, 0 = no pain and 10 = worst pain imaginable) will be used to further evaluate  
58  
59  
60



1  
2  
3  
4 the degree of pain. Insufficient postoperative analgesia is defined as an NRS score that  
5  
6 exceeds 4 and exceeds 6 lasted for 15 minutes. Information of analgesic drugs  
7  
8 administrated in case of insufficient postoperative analgesia was also recorded.  
9

10  
11  
12 3) Anesthesia recovery quality score. Anesthesia Steward Emergence Scale[22] will be  
13  
14 used at 1 and 2 hours after surgery to evaluate the recovery quality of anesthesia.  
15

16  
17 4) Analgesic satisfaction and sleep quality. Patient satisfaction with overall pain  
18  
19 management and sleep quality will be evaluated separately at 24 and 48 hours after  
20  
21 surgery using NRS.  
22  
23

24  
25 5) Adverse events. Ramsay score[23] and Nausea and vomiting scores as well other  
26  
27 adverse events (dizziness, fatigue, hematoma, local anesthetic poisoning and  
28  
29 hoarseness) will be evaluated at the 6 time points after surgery.  
30  
31

32  
33 6) Chronic pain assessment. Follow-up visit will be conducted by telephone at 3 and 6  
34  
35 months after surgery. If patients report chronic headache, the NRS score will be  
36  
37 assessed. The nature of pain will also be assessed by the Chinese version of the McGill  
38  
39 Pain Questionnaire-2[24]. The pain index will be calculated by daily pain duration (pain  
40  
41 hours/day), monthly pain duration (pain days/month) and pain NRS score.  
42  
43  
44

#### 45 46 ***Data collection***

47  
48 An independent research assistant will initiate baseline information collection at the  
49  
50 day before surgery. Basic demographic information, including gender, age, vital signs,  
51  
52 height, weight, past medical history, family history, medication history, pre-treatment  
53  
54 supplementary examination and assessment (ASA classification, headache and severity,  
55  
56 treatment, dizziness, tinnitus, facial paralysis, nausea, vomiting and other symptoms)  
57  
58  
59  
60

1  
2  
3  
4 will be collected. All personal information will be kept strictly confidential for research  
5  
6 purposes only. The assessment of primary and other secondary outcomes will be  
7  
8 performed by trained research assistants blinded to the group allocation. Only  
9  
10 designated researchers can obtain the interim results and final data.  
11  
12

### 13 14 ***Sample size calculation***

15  
16  
17 We estimate the sample size according to the primary outcome of postoperative-24-  
18  
19 hour PCA sufentanil consumption by using PASS 2011 software (NCSS LLC). Based  
20  
21 on the previous literature [25, 26], SNB reduces PCA sufentanil consumption by 40-50%  
22  
23 within postoperative 24 hours. Our preliminary study found that the postoperative 24  
24  
25 hours PCA sufentanil consumption in the control group is about  $50 \pm 30 \mu\text{g}$ . We  
26  
27 estimate the effect size was  $20 \mu\text{g}$ , the standard deviation was  $30 \mu\text{g}$ . The initial sample  
28  
29 size of 106 patients will be sufficient to detect the difference at a two-tailed significant  
30  
31 level of 0.05 and a power of 90% using Student t test, with a drop-out rate of 10%.  
32  
33  
34  
35  
36  
37

### 38 39 ***Statistical analysis***

40  
41 Analysis will be done using SPSS software (version 23.0). If necessary, consider the  
42  
43 number of missing outcomes as poor prognosis and conduct sensitivity analysis. The  
44  
45 continuous variables will be summarized with mean (standard deviation) or median  
46  
47 (interquartile range, IQR), depending on normality determined with Shapiro-Wilk test.  
48  
49 Normally distributed and continuous variables will be compared with Student's t-test,  
50  
51 while skewed variables will be compared using the Mann-Whitney U test. The  
52  
53 categorical variables will be described as counts ( percentages ) and compared with  
54  
55 chi-square analysis or Fisher's exact test. The repeated measurement data will be  
56  
57  
58  
59  
60

1  
2  
3  
4 analyzed by repeated measurements of variance analysis. Bonferroni correction will be  
5  
6 used for multiple comparisons. A significance level of  $P < 0.05$  was used to indicate  
7  
8 statistical significance.  
9

### 10 11 ***Reporting of adverse events***

12  
13 All adverse events will be closely monitored until a stable situation has been reached.  
14  
15 It will be immediately recorded and reported to the research site in case of any adverse  
16  
17 events. The chief investigator will be informed of any serious adverse events and  
18  
19 determine the severity and causality of these events. All adverse events associated with  
20  
21 this study will be recorded and reported to the ethics committee as part of the annual  
22  
23 report. The chief investigator will be responsible for all reported adverse events.  
24  
25  
26  
27  
28  
29

### 30 31 ***Protocol Amendment***

32  
33 The chief investigator will be responsible for any decision to amend the protocol. If  
34  
35 there is any modification (eg, changes to eligibility criteria, outcomes, analyses) the  
36  
37 principle investigator will communicate and gain approval from the China Ethics  
38  
39 Committee of Registering Clinical Trials prior to implementation, and communicate  
40  
41 with relevant other parties (eg, investigators, trial participants, trial registries, journals,  
42  
43 regulators)  
44  
45  
46  
47  
48

### 49 50 ***Data Monitoring Committee (DMC)***

51  
52 The data monitoring committee (DMC) will be composed of anesthesiologists, ethicists,  
53  
54 statisticians and methodologists, serving as an independent unit to monitor the safety,  
55  
56 efficacy, ethical issues and progress of trial. The DMC reserves the right to review  
57  
58 patient recruitment at any time. The audit process will be independent of investigators.  
59  
60

## *Discussion*

This is a prospective, single-center, randomized, parallel-group controlled trial to explore the efficacy and safety of preoperative ultrasound-guided superficial cervical plexus block for analgesia in patients undergoing suboccipital retrosigmoid craniotomy. With the continuous development of ultrasound guidance technology, utilization of visualized nerve block became more popular in clinical practice [20, 21, 27]. We design the current study to use ultrasound-guided cervical plexus block to explore the efficacy and safety of postoperative analgesia in patients undergoing suboccipital sigmoid approach for craniotomy. Although ultrasound guidance greatly improves the efficacy and safety of the block, we still can't ignore the risk associated with the cervical plexus block for the anatomic complexity of superficial cervical plexus. Therefore, in this study we will observe these complications such as hematoma, high epidural block or total spinal anesthesia, overdose and hoarseness. At the same time, in order to ensure the accuracy and consistency of ultrasound-guided puncture, the anesthesiologists who perform nerve block are the fixed group of people and will receive specific training before the first patients are enrolled, the corresponding ultrasound image data of puncture will be preserved, so as to ensure the uniformity of block effect in each patient. Although SCPB may reduce postcraniotomy pain, it is not routinely used in our current clinical practice. To maintain the analgesic effect on the patients in the control group, the patients will be given the same analgesic dosage regimen following the clinical routine of our medical center, which fully ensure that the patients are safe and painless

1  
2  
3  
4 during surgery. Postoperative PCA analgesia will be routinely given to all patients, and  
5  
6 rescue analgesics will be promptly administered when analgesia is insufficient.  
7  
8

9 Our study will improve the ideal analgesic regimen for patients undergoing suboccipital  
10  
11 retrosigmoid craniotomy, so as to reduce perioperative stress response and  
12  
13 complications, improve patient satisfaction, promote early recovery, reduce the  
14  
15 occurrence of chronic pain and ultimately provide a better long-term quality of life.  
16  
17

18  
19  
20 **Acknowledgements:** The authors would like to express their sincere gratitude to the  
21  
22 Department of Anesthesiology, Beijing Tiantan Hospital, with a special  
23  
24 acknowledgment to the colleagues of the Department of Neurosurgery, for their support  
25  
26 and cooperation.  
27  
28

29  
30  
31 **Author Contributions:** KP, MZ, JD, DXW, XY, SL, YMP: conceived the study,  
32  
33 contributed to the study design and analytical plans. MZ: drafted the protocol. All  
34  
35 authors read and approved the final protocol.  
36  
37

38  
39  
40 **Funding:** This work was supported by Beijing Municipal Administration of Hospitals  
41  
42 Clinical Medical Development of Special Funding Support (grant number:  
43  
44 ZYLX201708) and Ascent Plan (grant number: DFL20180502), Capital Development  
45  
46 Research Fund Project (grant number: 2018-2-2044).  
47  
48

49 **Competing interests:** None declared.  
50

51  
52 **Ethics approval:** This study is approved by the Ethics Review Committee of China  
53  
54 Registered Clinical Trials (Ethics Review No. ChiECRCT-20190047).  
55

56  
57 **Data sharing statement** The manuscript is a protocol for a randomized controlled trial,  
58  
59 which does not include data.  
60

## References

1. Dunbar PJ, Visco E, Lam AM: **Craniotomy procedures are associated with less analgesic requirements than other surgical procedures.** *Anesthesia and analgesia* 1999, **88**(2):335-340.
2. Maxwell LG, Buckley GM, Kudchadkar SR, Ely E, Stebbins EL, Dube C, Morad A, Jastaniah EA, Sethna NF, Yaster M: **Pain management following major intracranial surgery in pediatric patients: a prospective cohort study in three academic children's hospitals.** *Paediatric anaesthesia* 2014, **24**(11):1132-1140.
3. Gottschalk A, Berkow LC, Stevens RD, Mirski M, Thompson RE, White ED, Weingart JD, Long DM, Yaster M: **Prospective evaluation of pain and analgesic use following major elective intracranial surgery.** *Journal of neurosurgery* 2007, **106**(2):210-216.
4. Molnar L, Simon E, Nemes R, Fulesdi B, Molnar C: **Postcraniotomy headache.** *J Anesth* 2014, **28**(1):102-111.
5. Vadivelu N, Kai AM, Tran D, Kodumudi G, Legler A, Ayrian E: **Options for perioperative pain management in neurosurgery.** *Journal of pain research* 2016, **9**:37-47.
6. Rimaaja T, Haanpaa M, Blomstedt G, Farkkila M: **Headaches after acoustic neuroma surgery.** *Cephalalgia* 2007, **27**(10):1128-1135.
7. **Acute and chronic pain following craniotomy review.** *Anaesthesia* 2005.
8. Chowdhury T, Garg R, Sheshadri V, Venkatraghavan L, Bergese SD, Cappellani RB, Schaller B: **Perioperative Factors Contributing the Post-Craniotomy Pain: A Synthesis of Concepts.** *Front Med (Lausanne)* 2017, **4**:23.
9. Tittsworth WL, Abram J, Guin P, Herman MA, West J, Davis NW, Bushwitz J, Hurley RW, Seubert CN: **A prospective time-series quality improvement trial of a standardized analgesia protocol to reduce postoperative pain among neurosurgery patients.** *Journal of neurosurgery* 2016, **125**(6):1523-1532.

10. Schankin CJ, Gall C, Straube A: **Headache syndromes after acoustic neuroma surgery and their implications for quality of life.** *Cephalalgia* 2009, **29**(7):760-771.
11. Dunn LK, Naik BI, Nemergut EC, Durieux ME: **Post-Craniotomy Pain Management: Beyond Opioids.** *Curr Neurol Neurosci Rep* 2016, **16**(10):93.
12. Jian M, Li X, Wang A, Zhang L, Han R, Gelb AW: **Flurbiprofen and hypertension but not hydroxyethyl starch are associated with post-craniotomy intracranial haematoma requiring surgery.** *British journal of anaesthesia* 2014, **113**(5):832-839.
13. Zeng M, Dong J, Lin N, Zhang W, Zhang K, Peng K, Wang D, Zhao Y, Peng Y, Han R: **Preoperative Gabapentin Administration Improves Acute Postoperative Analgesia in Patients Undergoing Craniotomy: A Randomized Controlled Trial.** *Journal of neurosurgical anesthesiology* 2018.
14. Potters JW, Klimek M: **Local anesthetics for brain tumor resection: current perspectives.** *Local and regional anesthesia* 2018, **11**:1-8.
15. Chaki T, Sugino S, Janicki PK, Ishioka Y, Hatakeyama Y, Hayase T, Kaneuchi-Yamashita M, Kohri N, Yamakage M: **Efficacy and Safety of a Lidocaine and Ropivacaine Mixture for Scalp Nerve Block and Local Infiltration Anesthesia in Patients Undergoing Awake Craniotomy.** *Journal of neurosurgical anesthesiology* 2016, **28**(1):1-5.
16. Hwang JY, Bang JS, Oh CW, Joo JD, Park SJ, Do SH, Yoo YJ, Ryu JH: **Effect of scalp blocks with levobupivacaine on recovery profiles after craniotomy for aneurysm clipping: a randomized, double-blind, and controlled study.** *World neurosurgery* 2015, **83**(1):108-113.
17. Osborn I, Sebeo J: **"Scalp block" during craniotomy: a classic technique revisited.** *Journal of neurosurgical anesthesiology* 2010, **22**(3):187-194.
18. Girard F, Quentin C, Charbonneau S, Ayoub C, Boudreault D, Chouinard P, Ruel M, Moumdjian R: **Superficial cervical plexus block for transitional analgesia in infratentorial and occipital craniotomy: a randomized trial.** *Can J Anaesth* 2010, **57**(12):1065-1070.
19. Re M, Blanco J, Gomez de Segura IA: **Ultrasound-Guided Nerve Block Anesthesia.** *Vet Clin North Am Food Anim Pract* 2016, **32**(1):133-147.

- 1  
2  
3  
4  
5  
6  
7  
8  
9  
10  
11  
12  
13  
14  
15  
16  
17  
18  
19  
20  
21  
22  
23  
24  
25  
26  
27  
28  
29  
30  
31  
32  
33  
34  
35  
36  
37  
38  
39  
40  
41  
42  
43  
44  
45  
46  
47  
48  
49  
50  
51  
52  
53  
54  
55  
56  
57  
58  
59  
60
20. Barrington MJ, Uda Y: **Did ultrasound fulfill the promise of safety in regional anesthesia?** *Current opinion in anaesthesiology* 2018, **31**(5):649-655.
  21. Hoydonckx Y, Peng P: **Echo-guided invasive pain therapy: indications and limitations.** *Current opinion in anaesthesiology* 2018, **31**(6):739-748.
  22. Steward DJ: **A simplified scoring system for the post-operative recovery room.** *Can Anaesth Soc J* 1975, **22**(1):111-113.
  23. Porzio G, Aielli F, Verna L, Micolucci G, Aloisi P, Ficorella C: **Efficacy and safety of deep, continuous palliative sedation at home: a retrospective, single-institution study.** *Support Care Cancer* 2010, **18**(1):77-81.
  24. Dworkin RH, Turk DC, Revicki DA, Harding G, Coyne KS, Peirce-Sandner S, Bhagwat D, Everton D, Burke LB, Cowan P *et al*: **Development and initial validation of an expanded and revised version of the Short-form McGill Pain Questionnaire (SF-MPQ-2).** *Pain* 2009, **144**(1-2):35-42.
  25. Zhou H, Ou M, Yang Y, Ruan Q, Pan Y, Li Y: **Effect of skin infiltration with ropivacaine on postoperative pain in patients undergoing craniotomy.** *SpringerPlus* 2016, **5**(1):1180.
  26. Akcil EF, Dilmen OK, Vehid H, Ibisoglu LS, Tunali Y: **Which one is more effective for analgesia in infratentorial craniotomy? The scalp block or local anesthetic infiltration.** *Clinical neurology and neurosurgery* 2017, **154**:98-103.
  27. Senapathi TGA, Widnyana IMG, Aribawa I, Wiryana M, Sinardja IK, Nada IKW, Jaya A, Putra I: **Ultrasound-guided bilateral superficial cervical plexus block is more effective than landmark technique for reducing pain from thyroidectomy.** *Journal of pain research* 2017, **10**:1619-1622.



1  
2  
3  
4 **Figure legends**  
5

6  
7  
8 **Figure 1.** Consolidated Standards of Reporting Trials (CONSORT) flow diagram  
9

10  
11 **Figure 2.** Standard Protocol Items: Recommendations for Interventional Trials  
12

13  
14  
15 (SPIRIT)  
16  
17  
18  
19  
20  
21  
22  
23  
24  
25  
26  
27  
28  
29  
30  
31  
32  
33  
34  
35  
36  
37  
38  
39  
40  
41  
42  
43  
44  
45  
46  
47  
48  
49  
50  
51  
52  
53  
54  
55  
56  
57  
58  
59  
60

For peer review only

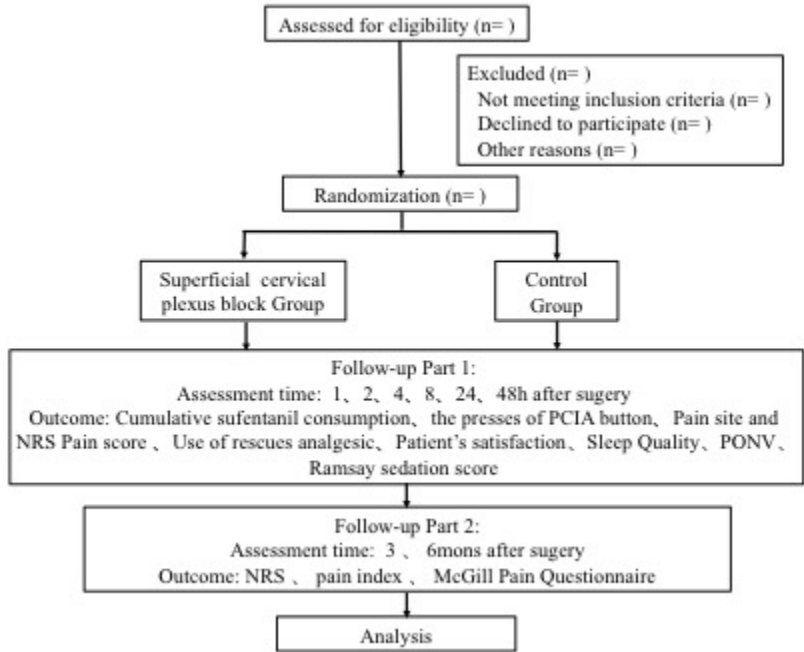

Consolidated Standards of Reporting Trials (CONSORT) flow diagram

146x117mm (72 x 72 DPI)

| STUDY PERIOD                             |           |             |                       |   |   |   |                      |   |   |    |     |
|------------------------------------------|-----------|-------------|-----------------------|---|---|---|----------------------|---|---|----|-----|
| TIMEPOINT                                | Enrolment | Allocation  | Post-allocation       |   |   |   |                      |   |   |    |     |
|                                          | -1day     | Surgery day | Post-craniotomy(hour) |   |   |   | Post-craniotomy(day) |   |   |    |     |
|                                          |           |             | 1                     | 2 | 4 | 8 | 12                   | 1 | 2 | 90 | 180 |
| ENROLMENT                                |           |             |                       |   |   |   |                      |   |   |    |     |
| Eligibility screen                       | X         |             |                       |   |   |   |                      |   |   |    |     |
| Informed consent                         | X         |             |                       |   |   |   |                      |   |   |    |     |
| Allocation                               |           | X           |                       |   |   |   |                      |   |   |    |     |
| INTERVENTIONS                            |           |             |                       |   |   |   |                      |   |   |    |     |
| SCPB group                               |           | X           |                       |   |   |   |                      |   |   |    |     |
| Control group                            |           | X           |                       |   |   |   |                      |   |   |    |     |
| ASSESSMENTS                              |           |             |                       |   |   |   |                      |   |   |    |     |
| Baseline variables                       |           | X           | X                     | X | X | X | X                    | X | X |    |     |
| Intraoperative data                      |           | X           |                       |   |   |   |                      |   |   |    |     |
| Anesthesia recovery quality score        |           |             | X                     | X |   |   |                      |   |   |    |     |
| Ramsay Score                             |           |             | X                     | X | X | X | X                    | X | X |    |     |
| Cumulative sufentanil consumption of PCA |           |             | X                     | X | X | X | X                    | X | X |    |     |
| Requests of PCA                          |           |             | X                     | X | X | X | X                    | X | X |    |     |
| Dose and frequency of rescue analgesic   |           |             | X                     | X | X | X | X                    | X | X |    |     |
| Pain location                            |           |             | X                     | X | X | X | X                    | X | X |    |     |
| Pain intensity (NRS)                     |           |             | X                     | X | X | X | X                    | X | X |    |     |
| Analgesia Satisfaction                   |           |             |                       |   |   |   |                      | X | X |    |     |
| Sleep quality                            |           |             |                       |   |   |   |                      | X | X |    |     |
| Adverse Event                            |           |             | X                     | X | X | X | X                    | X | X |    |     |
| Chronic pain                             |           |             |                       |   |   |   |                      |   |   | X  | X   |

## Standard Protocol Items- Recommendations for Interventional Trials

331x219mm (72 x 72 DPI)

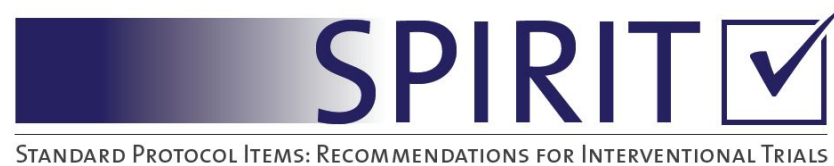

SPIRIT 2013 Checklist: Recommended items to address in a clinical trial protocol and related documents\*

**Checklist for Ultrasound guided superficial cervical plexus block for analgesia in patients undergoing craniotomy via suboccipital retrosigmoid approach: protocol of a randomized controlled trial**

| Section/item                      | Item No | Description                                                                                                                                                                                                                                                                              | Addressed on page number |
|-----------------------------------|---------|------------------------------------------------------------------------------------------------------------------------------------------------------------------------------------------------------------------------------------------------------------------------------------------|--------------------------|
| <b>Administrative information</b> |         |                                                                                                                                                                                                                                                                                          |                          |
| Title                             | 1       | Descriptive title identifying the study design, population, interventions, and, if applicable, trial acronym                                                                                                                                                                             | <u>1</u>                 |
| Trial registration                | 2a      | Trial identifier and registry name. If not yet registered, name of intended registry                                                                                                                                                                                                     | <u>3</u>                 |
|                                   | 2b      | All items from the World Health Organization Trial Registration Data Set                                                                                                                                                                                                                 | <u>3</u>                 |
| Protocol version                  | 3       | Date and version identifier                                                                                                                                                                                                                                                              | <u>3</u>                 |
| Funding                           | 4       | Sources and types of financial, material, and other support                                                                                                                                                                                                                              | <u>18</u>                |
| Roles and responsibilities        | 5a      | Names, affiliations, and roles of protocol contributors                                                                                                                                                                                                                                  | <u>1 &amp; 17</u>        |
|                                   | 5b      | Name and contact information for the trial sponsor                                                                                                                                                                                                                                       | <u>1</u>                 |
|                                   | 5c      | Role of study sponsor and funders, if any, in study design; collection, management, analysis, and interpretation of data; writing of the report; and the decision to submit the report for publication, including whether they will have ultimate authority over any of these activities | <u>18&amp;17</u>         |
|                                   | 5d      | Composition, roles, and responsibilities of the coordinating centre, steering committee, endpoint adjudication committee, data management team, and other individuals or groups overseeing the trial, if applicable (see Item 21a for data monitoring committee)                         | <u>Not Applicable</u>    |

|    |                                                           |     |                                                                                                               |                     |
|----|-----------------------------------------------------------|-----|---------------------------------------------------------------------------------------------------------------|---------------------|
| 1  | <b>Introduction</b>                                       |     |                                                                                                               |                     |
| 2  |                                                           |     |                                                                                                               |                     |
| 3  | Background and                                            | 6a  | Description of research question and justification for undertaking the trial, including summary of relevant   | <u>4-8</u>          |
| 4  | rationale                                                 |     | studies (published and unpublished) examining benefits and harms for each intervention                        |                     |
| 5  |                                                           |     |                                                                                                               |                     |
| 6  |                                                           | 6b  | Explanation for choice of comparators                                                                         | <u>4-8</u>          |
| 7  |                                                           |     |                                                                                                               |                     |
| 8  | Objectives                                                | 7   | Specific objectives or hypotheses                                                                             | <u>8</u>            |
| 9  |                                                           |     |                                                                                                               |                     |
| 10 | Trial design                                              | 8   | Description of trial design including type of trial (eg, parallel group, crossover, factorial, single group), |                     |
| 11 |                                                           |     | allocation ratio, and framework (eg, superiority, equivalence, noninferiority, exploratory)                   | <u>8</u>            |
| 12 |                                                           |     |                                                                                                               |                     |
| 13 |                                                           |     |                                                                                                               |                     |
| 14 | <b>Methods: Participants, interventions, and outcomes</b> |     |                                                                                                               |                     |
| 15 |                                                           |     |                                                                                                               |                     |
| 16 | Study setting                                             | 9   | Description of study settings (eg, community clinic, academic hospital) and list of countries where data will | <u>8</u>            |
| 17 |                                                           |     | be collected. Reference to where list of study sites can be obtained                                          |                     |
| 18 |                                                           |     |                                                                                                               |                     |
| 19 | Eligibility criteria                                      | 10  | Inclusion and exclusion criteria for participants. If applicable, eligibility criteria for study centres and  | <u>8-9</u>          |
| 20 |                                                           |     | individuals who will perform the interventions (eg, surgeons, psychotherapists)                               |                     |
| 21 |                                                           |     |                                                                                                               |                     |
| 22 | Interventions                                             | 11a | Interventions for each group with sufficient detail to allow replication, including how and when they will be | <u>10-11</u>        |
| 23 |                                                           |     | administered                                                                                                  |                     |
| 24 |                                                           |     |                                                                                                               |                     |
| 25 |                                                           | 11b | Criteria for discontinuing or modifying allocated interventions for a given trial participant (eg, drug dose  | <u>10-11</u>        |
| 26 |                                                           |     | change in response to harms, participant request, or improving/worsening disease)                             |                     |
| 27 |                                                           |     |                                                                                                               |                     |
| 28 |                                                           | 11c | Strategies to improve adherence to intervention protocols, and any procedures for monitoring adherence        | <u>10-11</u>        |
| 29 |                                                           |     | (eg, drug tablet return, laboratory tests)                                                                    |                     |
| 30 |                                                           |     |                                                                                                               |                     |
| 31 |                                                           | 11d | Relevant concomitant care and interventions that are permitted or prohibited during the trial                 | <u>11-13</u>        |
| 32 |                                                           |     |                                                                                                               |                     |
| 33 | Outcomes                                                  | 12  | Primary, secondary, and other outcomes, including the specific measurement variable (eg, systolic blood       | <u>13-14</u>        |
| 34 |                                                           |     | pressure), analysis metric (eg, change from baseline, final value, time to event), method of aggregation (eg, |                     |
| 35 |                                                           |     | median, proportion), and time point for each outcome. Explanation of the clinical relevance of chosen         |                     |
| 36 |                                                           |     | efficacy and harm outcomes is strongly recommended                                                            |                     |
| 37 |                                                           |     |                                                                                                               |                     |
| 38 | Participant timeline                                      | 13  | Time schedule of enrolment, interventions (including any run-ins and washouts), assessments, and visits for   | <u>see Figure 2</u> |
| 39 |                                                           |     | participants. A schematic diagram is highly recommended (see Figure)                                          |                     |
| 40 |                                                           |     |                                                                                                               |                     |
| 41 |                                                           |     |                                                                                                               |                     |
| 42 |                                                           |     |                                                                                                               |                     |
| 43 |                                                           |     |                                                                                                               |                     |
| 44 |                                                           |     |                                                                                                               |                     |
| 45 |                                                           |     |                                                                                                               |                     |
| 46 |                                                           |     |                                                                                                               |                     |

|    |                                                                     |     |                                                                                                                                                                                                                                                                                                                                                                                                              |               |
|----|---------------------------------------------------------------------|-----|--------------------------------------------------------------------------------------------------------------------------------------------------------------------------------------------------------------------------------------------------------------------------------------------------------------------------------------------------------------------------------------------------------------|---------------|
| 1  | Sample size                                                         | 14  | Estimated number of participants needed to achieve study objectives and how it was determined, including clinical and statistical assumptions supporting any sample size calculations                                                                                                                                                                                                                        | <u>15</u>     |
| 2  |                                                                     |     |                                                                                                                                                                                                                                                                                                                                                                                                              |               |
| 3  |                                                                     |     |                                                                                                                                                                                                                                                                                                                                                                                                              |               |
| 4  | Recruitment                                                         | 15  | Strategies for achieving adequate participant enrolment to reach target sample size                                                                                                                                                                                                                                                                                                                          | <u>8</u>      |
| 5  |                                                                     |     |                                                                                                                                                                                                                                                                                                                                                                                                              |               |
| 6  | <b>Methods: Assignment of interventions (for controlled trials)</b> |     |                                                                                                                                                                                                                                                                                                                                                                                                              |               |
| 7  | <b>Allocation:</b>                                                  |     |                                                                                                                                                                                                                                                                                                                                                                                                              |               |
| 8  |                                                                     |     |                                                                                                                                                                                                                                                                                                                                                                                                              |               |
| 9  |                                                                     |     |                                                                                                                                                                                                                                                                                                                                                                                                              |               |
| 10 | Sequence generation                                                 | 16a | Method of generating the allocation sequence (eg, computer-generated random numbers), and list of any factors for stratification. To reduce predictability of a random sequence, details of any planned restriction (eg, blocking) should be provided in a separate document that is unavailable to those who enrol participants or assign interventions                                                     | <u>9</u>      |
| 11 |                                                                     |     |                                                                                                                                                                                                                                                                                                                                                                                                              |               |
| 12 |                                                                     |     |                                                                                                                                                                                                                                                                                                                                                                                                              |               |
| 13 |                                                                     |     |                                                                                                                                                                                                                                                                                                                                                                                                              |               |
| 14 |                                                                     |     |                                                                                                                                                                                                                                                                                                                                                                                                              |               |
| 15 |                                                                     |     |                                                                                                                                                                                                                                                                                                                                                                                                              |               |
| 16 | Allocation concealment mechanism                                    | 16b | Mechanism of implementing the allocation sequence (eg, central telephone; sequentially numbered, opaque, sealed envelopes), describing any steps to conceal the sequence until interventions are assigned                                                                                                                                                                                                    | <u>9</u>      |
| 17 |                                                                     |     |                                                                                                                                                                                                                                                                                                                                                                                                              |               |
| 18 |                                                                     |     |                                                                                                                                                                                                                                                                                                                                                                                                              |               |
| 19 |                                                                     |     |                                                                                                                                                                                                                                                                                                                                                                                                              |               |
| 20 | Implementation                                                      | 16c | Who will generate the allocation sequence, who will enrol participants, and who will assign participants to interventions                                                                                                                                                                                                                                                                                    | <u>9</u>      |
| 21 |                                                                     |     |                                                                                                                                                                                                                                                                                                                                                                                                              |               |
| 22 |                                                                     |     |                                                                                                                                                                                                                                                                                                                                                                                                              |               |
| 23 |                                                                     |     |                                                                                                                                                                                                                                                                                                                                                                                                              |               |
| 24 | Blinding (masking)                                                  | 17a | Who will be blinded after assignment to interventions (eg, trial participants, care providers, outcome assessors, data analysts), and how                                                                                                                                                                                                                                                                    | <u>9</u>      |
| 25 |                                                                     |     |                                                                                                                                                                                                                                                                                                                                                                                                              |               |
| 26 |                                                                     |     |                                                                                                                                                                                                                                                                                                                                                                                                              |               |
| 27 |                                                                     | 17b | If blinded, circumstances under which unblinding is permissible, and procedure for revealing a participant's allocated intervention during the trial                                                                                                                                                                                                                                                         | <u>9</u>      |
| 28 |                                                                     |     |                                                                                                                                                                                                                                                                                                                                                                                                              |               |
| 29 |                                                                     |     |                                                                                                                                                                                                                                                                                                                                                                                                              |               |
| 30 |                                                                     |     |                                                                                                                                                                                                                                                                                                                                                                                                              |               |
| 31 | <b>Methods: Data collection, management, and analysis</b>           |     |                                                                                                                                                                                                                                                                                                                                                                                                              |               |
| 32 |                                                                     |     |                                                                                                                                                                                                                                                                                                                                                                                                              |               |
| 33 | Data collection methods                                             | 18a | Plans for assessment and collection of outcome, baseline, and other trial data, including any related processes to promote data quality (eg, duplicate measurements, training of assessors) and a description of study instruments (eg, questionnaires, laboratory tests) along with their reliability and validity, if known. Reference to where data collection forms can be found, if not in the protocol | <u>9 - 10</u> |
| 34 |                                                                     |     |                                                                                                                                                                                                                                                                                                                                                                                                              |               |
| 35 |                                                                     |     |                                                                                                                                                                                                                                                                                                                                                                                                              |               |
| 36 |                                                                     |     |                                                                                                                                                                                                                                                                                                                                                                                                              |               |
| 37 |                                                                     |     |                                                                                                                                                                                                                                                                                                                                                                                                              |               |
| 38 |                                                                     |     |                                                                                                                                                                                                                                                                                                                                                                                                              |               |
| 39 |                                                                     | 18b | Plans to promote participant retention and complete follow-up, including list of any outcome data to be collected for participants who discontinue or deviate from intervention protocols                                                                                                                                                                                                                    | <u>10</u>     |
| 40 |                                                                     |     |                                                                                                                                                                                                                                                                                                                                                                                                              |               |
| 41 |                                                                     |     |                                                                                                                                                                                                                                                                                                                                                                                                              |               |
| 42 |                                                                     |     |                                                                                                                                                                                                                                                                                                                                                                                                              |               |
| 43 |                                                                     |     |                                                                                                                                                                                                                                                                                                                                                                                                              |               |
| 44 |                                                                     |     |                                                                                                                                                                                                                                                                                                                                                                                                              |               |
| 45 |                                                                     |     |                                                                                                                                                                                                                                                                                                                                                                                                              |               |
| 46 |                                                                     |     |                                                                                                                                                                                                                                                                                                                                                                                                              |               |

|    |                                 |     |                                                                                                                                                                                                                                                                                                                                       |                       |
|----|---------------------------------|-----|---------------------------------------------------------------------------------------------------------------------------------------------------------------------------------------------------------------------------------------------------------------------------------------------------------------------------------------|-----------------------|
| 1  | Data management                 | 19  | Plans for data entry, coding, security, and storage, including any related processes to promote data quality (eg, double data entry; range checks for data values). Reference to where details of data management procedures can be found, if not in the protocol                                                                     | <u>13-14</u>          |
| 2  |                                 |     |                                                                                                                                                                                                                                                                                                                                       |                       |
| 3  |                                 |     |                                                                                                                                                                                                                                                                                                                                       |                       |
| 4  |                                 |     |                                                                                                                                                                                                                                                                                                                                       |                       |
| 5  | Statistical methods             | 20a | Statistical methods for analysing primary and secondary outcomes. Reference to where other details of the statistical analysis plan can be found, if not in the protocol                                                                                                                                                              | <u>10 - 11</u>        |
| 6  |                                 |     |                                                                                                                                                                                                                                                                                                                                       |                       |
| 7  |                                 |     |                                                                                                                                                                                                                                                                                                                                       |                       |
| 8  |                                 | 20b | Methods for any additional analyses (eg, subgroup and adjusted analyses)                                                                                                                                                                                                                                                              | <u>15-16</u>          |
| 9  |                                 |     |                                                                                                                                                                                                                                                                                                                                       |                       |
| 10 |                                 | 20c | Definition of analysis population relating to protocol non-adherence (eg, as randomised analysis), and any statistical methods to handle missing data (eg, multiple imputation)                                                                                                                                                       | <u>15-16</u>          |
| 11 |                                 |     |                                                                                                                                                                                                                                                                                                                                       |                       |
| 12 |                                 |     |                                                                                                                                                                                                                                                                                                                                       |                       |
| 13 |                                 |     |                                                                                                                                                                                                                                                                                                                                       |                       |
| 14 | <b>Methods: Monitoring</b>      |     |                                                                                                                                                                                                                                                                                                                                       |                       |
| 15 |                                 |     |                                                                                                                                                                                                                                                                                                                                       |                       |
| 16 | Data monitoring                 | 21a | Composition of data monitoring committee (DMC); summary of its role and reporting structure; statement of whether it is independent from the sponsor and competing interests; and reference to where further details about its charter can be found, if not in the protocol. Alternatively, an explanation of why a DMC is not needed | <u>16</u>             |
| 17 |                                 |     |                                                                                                                                                                                                                                                                                                                                       |                       |
| 18 |                                 |     |                                                                                                                                                                                                                                                                                                                                       |                       |
| 19 |                                 |     |                                                                                                                                                                                                                                                                                                                                       |                       |
| 20 |                                 |     |                                                                                                                                                                                                                                                                                                                                       |                       |
| 21 |                                 |     |                                                                                                                                                                                                                                                                                                                                       |                       |
| 22 |                                 | 21b | Description of any interim analyses and stopping guidelines, including who will have access to these interim results and make the final decision to terminate the trial                                                                                                                                                               | <u>15-16</u>          |
| 23 |                                 |     |                                                                                                                                                                                                                                                                                                                                       |                       |
| 24 |                                 |     |                                                                                                                                                                                                                                                                                                                                       |                       |
| 25 | Harms                           | 22  | Plans for collecting, assessing, reporting, and managing solicited and spontaneously reported adverse events and other unintended effects of trial interventions or trial conduct                                                                                                                                                     | <u>16</u>             |
| 26 |                                 |     |                                                                                                                                                                                                                                                                                                                                       |                       |
| 27 |                                 |     |                                                                                                                                                                                                                                                                                                                                       |                       |
| 28 | Auditing                        | 23  | Frequency and procedures for auditing trial conduct, if any, and whether the process will be independent from investigators and the sponsor                                                                                                                                                                                           | <u>Not Applicable</u> |
| 29 |                                 |     |                                                                                                                                                                                                                                                                                                                                       |                       |
| 30 |                                 |     |                                                                                                                                                                                                                                                                                                                                       |                       |
| 31 |                                 |     |                                                                                                                                                                                                                                                                                                                                       |                       |
| 32 | <b>Ethics and dissemination</b> |     |                                                                                                                                                                                                                                                                                                                                       |                       |
| 33 |                                 |     |                                                                                                                                                                                                                                                                                                                                       |                       |
| 34 | Research ethics approval        | 24  | Plans for seeking research ethics committee/institutional review board (REC/IRB) approval                                                                                                                                                                                                                                             | <u>8 &amp; 18</u>     |
| 35 |                                 |     |                                                                                                                                                                                                                                                                                                                                       |                       |
| 36 |                                 |     |                                                                                                                                                                                                                                                                                                                                       |                       |
| 37 | Protocol amendments             | 25  | Plans for communicating important protocol modifications (eg, changes to eligibility criteria, outcomes, analyses) to relevant parties (eg, investigators, REC/IRBs, trial participants, trial registries, journals, regulators)                                                                                                      | <u>16</u>             |
| 38 |                                 |     |                                                                                                                                                                                                                                                                                                                                       |                       |
| 39 |                                 |     |                                                                                                                                                                                                                                                                                                                                       |                       |
| 40 |                                 |     |                                                                                                                                                                                                                                                                                                                                       |                       |
| 41 |                                 |     |                                                                                                                                                                                                                                                                                                                                       |                       |
| 42 |                                 |     |                                                                                                                                                                                                                                                                                                                                       |                       |
| 43 |                                 |     |                                                                                                                                                                                                                                                                                                                                       |                       |
| 44 |                                 |     |                                                                                                                                                                                                                                                                                                                                       |                       |
| 45 |                                 |     |                                                                                                                                                                                                                                                                                                                                       |                       |
| 46 |                                 |     |                                                                                                                                                                                                                                                                                                                                       |                       |

|    |                               |     |                                                                                                                                                                                                                                                                                     |                               |
|----|-------------------------------|-----|-------------------------------------------------------------------------------------------------------------------------------------------------------------------------------------------------------------------------------------------------------------------------------------|-------------------------------|
| 1  | Consent or assent             | 26a | Who will obtain informed consent or assent from potential trial participants or authorised surrogates, and how (see Item 32)                                                                                                                                                        | <u>8</u>                      |
| 2  |                               |     |                                                                                                                                                                                                                                                                                     |                               |
| 3  |                               |     |                                                                                                                                                                                                                                                                                     |                               |
| 4  |                               | 26b | Additional consent provisions for collection and use of participant data and biological specimens in ancillary studies, if applicable                                                                                                                                               | <u>Not Applicable</u>         |
| 5  |                               |     |                                                                                                                                                                                                                                                                                     |                               |
| 6  |                               |     |                                                                                                                                                                                                                                                                                     |                               |
| 7  | Confidentiality               | 27  | How personal information about potential and enrolled participants will be collected, shared, and maintained in order to protect confidentiality before, during, and after the trial                                                                                                | <u>15</u>                     |
| 8  |                               |     |                                                                                                                                                                                                                                                                                     |                               |
| 9  |                               |     |                                                                                                                                                                                                                                                                                     |                               |
| 10 | Declaration of interests      | 28  | Financial and other competing interests for principal investigators for the overall trial and each study site                                                                                                                                                                       | <u>18</u>                     |
| 11 |                               |     |                                                                                                                                                                                                                                                                                     |                               |
| 12 |                               |     |                                                                                                                                                                                                                                                                                     |                               |
| 13 | Access to data                | 29  | Statement of who will have access to the final trial dataset, and disclosure of contractual agreements that limit such access for investigators                                                                                                                                     | <u>18</u>                     |
| 14 |                               |     |                                                                                                                                                                                                                                                                                     |                               |
| 15 |                               |     |                                                                                                                                                                                                                                                                                     |                               |
| 16 | Ancillary and post-trial care | 30  | Provisions, if any, for ancillary and post-trial care, and for compensation to those who suffer harm from trial participation                                                                                                                                                       | <u>in consent form</u>        |
| 17 |                               |     |                                                                                                                                                                                                                                                                                     |                               |
| 18 |                               |     |                                                                                                                                                                                                                                                                                     |                               |
| 19 |                               |     |                                                                                                                                                                                                                                                                                     |                               |
| 20 | Dissemination policy          | 31a | Plans for investigators and sponsor to communicate trial results to participants, healthcare professionals, the public, and other relevant groups (eg, via publication, reporting in results databases, or other data sharing arrangements), including any publication restrictions | <u>3</u>                      |
| 21 |                               |     |                                                                                                                                                                                                                                                                                     |                               |
| 22 |                               |     |                                                                                                                                                                                                                                                                                     |                               |
| 23 |                               |     |                                                                                                                                                                                                                                                                                     |                               |
| 24 |                               | 31b | Authorship eligibility guidelines and any intended use of professional writers                                                                                                                                                                                                      | <u>3</u>                      |
| 25 |                               |     |                                                                                                                                                                                                                                                                                     |                               |
| 26 |                               | 31c | Plans, if any, for granting public access to the full protocol, participant-level dataset, and statistical code                                                                                                                                                                     | <u>3</u>                      |
| 27 |                               |     |                                                                                                                                                                                                                                                                                     |                               |
| 28 |                               |     |                                                                                                                                                                                                                                                                                     |                               |
| 29 | <b>Appendices</b>             |     |                                                                                                                                                                                                                                                                                     |                               |
| 30 |                               |     |                                                                                                                                                                                                                                                                                     |                               |
| 31 | Informed consent materials    | 32  | Model consent form and other related documentation given to participants and authorised surrogates                                                                                                                                                                                  | <u>has been proved by IRB</u> |
| 32 |                               |     |                                                                                                                                                                                                                                                                                     |                               |
| 33 |                               |     |                                                                                                                                                                                                                                                                                     |                               |
| 34 | Biological specimens          | 33  | Plans for collection, laboratory evaluation, and storage of biological specimens for genetic or molecular analysis in the current trial and for future use in ancillary studies, if applicable                                                                                      | <u>Not Applicable</u>         |
| 35 |                               |     |                                                                                                                                                                                                                                                                                     |                               |
| 36 |                               |     |                                                                                                                                                                                                                                                                                     |                               |

\*It is strongly recommended that this checklist be read in conjunction with the SPIRIT 2013 Explanation & Elaboration for important clarification on the items. Amendments to the protocol should be tracked and dated. The SPIRIT checklist is copyrighted by the SPIRIT Group under the Creative Commons "[Attribution-NonCommercial-NoDerivs 3.0 Unported](https://creativecommons.org/licenses/by-nc-nd/3.0/)" license.



# BMJ Open

## Ultrasound guided superficial cervical plexus block for analgesia in patients undergoing craniotomy via suboccipital retrosigmoid approach: study protocol of a randomized controlled trial

|                                 |                                                                                                                                                                                                                                                                                                                                                                                                     |
|---------------------------------|-----------------------------------------------------------------------------------------------------------------------------------------------------------------------------------------------------------------------------------------------------------------------------------------------------------------------------------------------------------------------------------------------------|
| Journal:                        | <i>BMJ Open</i>                                                                                                                                                                                                                                                                                                                                                                                     |
| Manuscript ID                   | bmjopen-2019-034003.R1                                                                                                                                                                                                                                                                                                                                                                              |
| Article Type:                   | Protocol                                                                                                                                                                                                                                                                                                                                                                                            |
| Date Submitted by the Author:   | 18-Nov-2019                                                                                                                                                                                                                                                                                                                                                                                         |
| Complete List of Authors:       | Peng, Kun; Beijing Tiantan Hospital, Anesthesiology<br>Zeng, Min; Beijing Tiantan Hospital, Anesthesiology<br>Dong, Jia; Beijing Tiantan Hospital, Anesthesiology<br>Yan, Xiang; Beijing Tiantan Hospital, Anesthesiology<br>Wang, Dexiang; Beijing Tiantan Hospital, anesthesiology<br>Li, Shu; Beijing Tiantan Hospital, Anesthesiology<br>Peng, Yuming; Beijing Tiantan Hospital, Anesthesiology |
| <b>Primary Subject Heading</b>: | Anaesthesia                                                                                                                                                                                                                                                                                                                                                                                         |
| Secondary Subject Heading:      | Anaesthesia                                                                                                                                                                                                                                                                                                                                                                                         |
| Keywords:                       | craniotomy, analgesia, superficial cervical plexus block, Ultrasound < RADIOLOGY & IMAGING                                                                                                                                                                                                                                                                                                          |
|                                 |                                                                                                                                                                                                                                                                                                                                                                                                     |

SCHOLARONE™  
Manuscripts



I, the Submitting Author has the right to grant and does grant on behalf of all authors of the Work (as defined in the below author licence), an exclusive licence and/or a non-exclusive licence for contributions from authors who are: i) UK Crown employees; ii) where BMJ has agreed a CC-BY licence shall apply, and/or iii) in accordance with the terms applicable for US Federal Government officers or employees acting as part of their official duties; on a worldwide, perpetual, irrevocable, royalty-free basis to BMJ Publishing Group Ltd ("BMJ") its licensees and where the relevant Journal is co-owned by BMJ to the co-owners of the Journal, to publish the Work in this journal and any other BMJ products and to exploit all rights, as set out in our [licence](#).

The Submitting Author accepts and understands that any supply made under these terms is made by BMJ to the Submitting Author unless you are acting as an employee on behalf of your employer or a postgraduate student of an affiliated institution which is paying any applicable article publishing charge ("APC") for Open Access articles. Where the Submitting Author wishes to make the Work available on an Open Access basis (and intends to pay the relevant APC), the terms of reuse of such Open Access shall be governed by a Creative Commons licence – details of these licences and which [Creative Commons](#) licence will apply to this Work are set out in our licence referred to above.

Other than as permitted in any relevant BMJ Author's Self Archiving Policies, I confirm this Work has not been accepted for publication elsewhere, is not being considered for publication elsewhere and does not duplicate material already published. I confirm all authors consent to publication of this Work and authorise the granting of this licence.

1  
2  
3  
4 **Ultrasound guided superficial cervical plexus block for analgesia in patients**  
5  
6 **undergoing craniotomy via suboccipital retrosigmoid approach: study protocol of**  
7  
8 **a randomized controlled trial**  
9  
10

11  
12  
13  
14 \*Kun Peng<sup>1</sup>, M.D., \*Min Zeng<sup>2</sup>, M.D., Jia Dong<sup>3</sup>, M.D., Xiang Yan<sup>4</sup>, M.D., Dexiang  
15 Wang<sup>5</sup>, M.D., Shu Li<sup>6</sup>, M.D., Ph.D., Yuming Peng<sup>7§</sup>, M.D., Ph.D.

16  
17 Department of Anesthesiology, Beijing Tiantan Hospital, Capital Medical University,  
18 Beijing, PR China.  
19

20  
21  
22  
23 \*Kun Peng and Min Zeng are co-first authors.  
24

25  
26 §Corresponding authors and requests for reprints:  
27

28 Yuming Peng, M.D., Ph.D.

29  
30 Department of Anesthesiology, Beijing Tiantan Hospital, Capital Medical University,  
31 PR China  
32

33 Mailing address: No.119, Nansihuan Xilu, Fengtai District, Beijing, PR China 100070.

34  
35 Phone: 8610-59976658

36  
37 Email: florapym766@163.com  
38

39  
40 Word count: 3396 words  
41

42  
43  
44 Email address:

45  
46 Kun Peng: 13693215761@163.com

47  
48 Min Zeng: fly800727@163.com

49  
50 Jia Dong: dongjia800@hotmail.com

51  
52 Xiang Yan: yanxiang9991@163.com

53  
54 Dexiang Wang: ttyywdx@163.com

55  
56 Shu Li: emilyneuro@gmail.com

57  
58 Yuming Peng: florapym766@163.com  
59  
60

## Abstract

**Introduction** Scalp nerve block has been proven to be an alternative choice to opioids in multimodal analgesia. However, for the infratentorial space-occupying craniotomy, especially the suboccipital retrosigmoid craniotomy, scalp nerve block is insufficient.

**Methods and analysis** The study is a prospective, single-center, randomized, paralleled-group controlled trial. Patients scheduled to receive elective suboccipital retrosigmoid craniotomy will be randomly assigned to the superficial cervical plexus block group or the control group. After anesthesia induction, superficial cervical plexus nerve block will be performed under the guidance of ultrasound. The primary outcome is the cumulative consumption of sufentanil by the patient controlled intravenous analgesia pump within 24 hours after surgery. Secondary outcomes include the cumulative consumption of sufentanil at other 4 time points and numerical rating scale pain severity score.

**Keywords** craniotomy, analgesia, superficial cervical plexus block, ultrasound

**Ethics approval and dissemination** The protocol (version number: 2.0, April 10, 2019) has been approved by the Ethics Review Committee of China Registered Clinical Trials (Ethics Review No. ChiECRCT-20190047). The findings of this study will be disseminated in peer-reviewed journals and at scientific conferences.

**Trial registration number** NCT03033693.

## *Article Summary*

### *Strengths and limitations of this study*

- This is the randomized controlled trial to observe the efficacy and safety of preoperative ultrasound-guided superficial cervical plexus block on postoperative analgesia in patients undergoing craniotomy via suboccipital retrosigmoid approach.
- The results will optimize postoperative analgesia in patients undergoing infratentorial craniotomy, thereby improving prognosis of the patients.
- This is a single-center clinical trial design which might limit the generalization of the conclusion.

## ***Background***

The procedure of craniotomy was previously assumed to be less painful than other sites of surgeries [1-3]. However, in the prospective study of patients undergoing craniotomy, Gottchalk et al. found that the incidence of postoperative pain was as high as 87%, among of 55% patients experienced moderate to severe pain [4].

Post-craniotomy pain is mainly caused by scalp incision, with abundant free nerve endings. After incision, noxious stimulus signals from the scalp is received by the trigeminal branches or cervical plexus branches, and then transmitted through the trigeminal nucleus and the dorsal horn of the spinal cord to the hypothalamus and cerebral cortex. The whole process is regulated by a variety of inflammatory mediators, peripheral nerve pathways and central nervous system [5].

The pain severity after craniotomy is closely associated with surgical approach. Gottschalk et al. evaluated pain after craniotomy and found that the infratentorial approach was associated with severe postoperative pain and more perioperative analgesic requirements [4]. Rimaaja et al. reported that 32% of patients had no or only mild headache prior to removal of the cerebellopontine angle area mass, while 64% of patients developed severe headache after craniotomy [6]. The high incidence of postoperative pain after craniotomy through infratentorial approach, especially suboccipital retrosigmoid approach may be related to the injury of neck muscles and posterior occipital muscles by the surgical approach, as well as the special position of the head and neck during craniotomy, leading to postoperative muscle spasm [7, 8].

1  
2  
3  
4 Therefore, it is necessary to explore an ideal analgesic modality that can effectively  
5  
6 provide surgical analgesia with minimal or no systemic changes for this population.  
7  
8

9 The skin incision is the main source of pain during craniotomy. Scalp nerve block (SNB)  
10  
11 has been proven to be an excellent alternative analgesic choice in supratentorial  
12  
13 surgeries [9-11]. However, for the suboccipital retrosigmoid craniotomy, the scalp  
14  
15 innervation area is insufficient to cover the incision, resulting defective nerve blockage.  
16  
17 Therefore, it is necessary to explore an analgesic modality to provide a more ideal  
18  
19 analgesic regimen for patients undergoing suboccipital retrosigmoid craniotomy.  
20  
21  
22  
23

24 The cervical plexus is from the anterior branch of C1-C4 cervical nerve, divided into  
25  
26 superficial plexus and deep plexus. The cutaneous branches of the superficial cervical  
27  
28 plexus include the lesser occipital nerve, the greater auricular nerve, transverse cervical  
29  
30 nerve and supraclavicular nerve, innervating the incision area of the suboccipital  
31  
32 sigmoid sinus approach craniotomy [12]. Therefore, the superficial cervical plexus  
33  
34 block (SCPB) is a potential candidate to satisfy the analgesic requirement of  
35  
36 retrosigmoid craniotomy. Francois et al. observed the effect of transitional analgesia  
37  
38 from SCPB after elective infratentorial or occipital craniotomy in 30 patients [13]. In  
39  
40 the control group, 0.1mg/kg morphine was administrated after close of the dura. It was  
41  
42 found that the effect of SCPB on postoperative analgesia was not inferior to  
43  
44 administration of morphine after dura closure. However, the sample size estimation  
45  
46 they made is too small. Second, SCPB wasn't guided by ultrasound. The analgesic  
47  
48 effect of SCPB may not be fully guaranteed. In addition, no related adverse effects were  
49  
50  
51  
52  
53  
54  
55  
56  
57  
58  
59  
60

1  
2  
3  
4 reported in that study. However, the study provided us a feasible method of SCPB  
5  
6 analgesia for suboccipital retrosigmoid craniotomy.  
7  
8

9 With the continual development of visualization techniques, ultrasound-guided nerve  
10  
11 blocks have become increasingly popular [14-16]. Ultrasound-guided SCPB, the  
12  
13 operator can directly see adjacent anatomical structure, inject the local anesthetic into  
14  
15 the correct anatomical level, avoid accidental injury during the puncture, and avoid the  
16  
17 unexpected deep cervical plexus block. Ultrasound-guided SCPB has the advantages of  
18  
19 faster onset of action, less dosage, high success rate, and fewer complications [17, 18].  
20  
21 Therefore, we propose the hypothesis that preoperative ultrasound-guided SCPB could  
22  
23 safely and effectively provide analgesia for patients undergoing craniotomy via  
24  
25 suboccipital retrosigmoid approach. The objective is to compare the cumulative  
26  
27 consumption of postoperative opioids between groups.  
28  
29  
30  
31  
32  
33  
34

## 35 ***Methods***

### 36 ***Study design***

37  
38 This is a prospective, single-center, randomized, paralleled-group controlled trial  
39  
40 ( Figure 1. ) being conducted at Beijing Tiantan Hospital, Capital Medical  
41  
42 University, China. The study was approved by the Ethics Review Committee of China  
43  
44 Registered Clinical Trials on April 8, 2019 (No. ChiECRCT-20190047). The study was  
45  
46 registered within [clinicaltrials.gov](http://clinicaltrials.gov) on June 29 with the registration number  
47  
48 NCT04036812. Preoperative interviews will be conducted by specially trained research  
49  
50 assistants to inform patients of the study objectives, risks and benefits, and to obtain  
51  
52 written informed consent from patients or legal representatives. The schedule of  
53  
54  
55  
56  
57  
58  
59  
60



1  
2  
3  
4 enrollment and assessments is shown in the Standard Protocol Items:  
5  
6 Recommendations for Interventional Trials (SPIRIT) ( Figure 2.).  
7  
8

9  
10 ***Study population***

11  
12 **Inclusion criteria**

13  
14 Patients scheduled to undergo elective suboccipital retrosigmoid craniotomy will  
15  
16 be recruited for screening eligibility one day before surgery. Inclusion criteria  
17  
18 include age between 18 and 65 years, and American Society of Anesthesiologists (ASA)  
19  
20 physical status I-III.  
21  
22

23  
24 **Exclusion criteria**

25  
26 Exclusion criteria include refuse to provide written informed consent, local infection,  
27  
28 preoperative impairment of consciousness and cognitive function, uncontrolled  
29  
30 hypertension, inability to communicate; allergic to experimental drugs; history of drug  
31  
32 abuse; history of chronic headache; aphasia and hearing impairment; second  
33  
34 craniotomy; body mass index  $< 18.5 \text{ kg/m}^2$  or  $> 35.0 \text{ kg/m}^2$  .  
35  
36  
37  
38  
39

40  
41 ***Randomization and blinding***

42  
43 Randomization will be conducted via a computer-generated table by an independent  
44  
45 research assistant who will be pack the allocation sequence with identical shape and  
46  
47 size opaque envelopes and distribute to the researcher. The researcher will open the  
48  
49 envelopes and perform a SCPB or only puncture based on the grouping. Patients will  
50  
51 be randomly assigned to two groups with a 1: 1 ratio. The researcher assistant, patients,  
52  
53 the anesthesiologist responsible for intraoperative management and outcome assessors  
54  
55  
56  
57  
58  
59  
60

1  
2  
3  
4 will all be blinded to the allocation until the completion of the study analysis unless  
5  
6 specific circumstances, such as the occurrence of a serious adverse event (SAE).  
7  
8

### 9 ***Data collection***

10  
11 After obtaining informed consent, an independent research assistant will initiate  
12  
13 baseline information collection one day before surgery. Basic demographic information,  
14  
15 including gender, age, vital signs, height, weight, past medical history/family history,  
16  
17 medication history, supplementary examination, assessment (ASA classification,  
18  
19 headache and severity, treatment, dizziness, tinnitus, facial paralysis, nausea, vomiting  
20  
21 and other symptoms) will be collected. All personal information will be kept strictly  
22  
23 confidential for research purposes only. The assessment of primary and other secondary  
24  
25 outcomes will be performed by trained research assessors who are blinded to the group  
26  
27 allocation.  
28  
29  
30  
31  
32  
33  
34

### 35 ***Intervention***

36  
37 Patients will be randomly assigned to the SCBP group or the control group. Peripheral  
38  
39 venous access will be established upon arrival in operating room. After anaesthesia  
40  
41 induction, SCPB will be performed under the guidance of ultrasound (HITACHI  
42  
43 Company, Noblus) by the independent researcher who will not involve in intraoperative  
44  
45 management or postoperative follow-up. Patients will be at supine position with  
46  
47 ipsilateral shoulder relaxed and slightly elevated while head tilting to the opposite side.  
48  
49 After marking the midpoint of the posterior border of clavicular head of the  
50  
51 sternocleidomastoid muscle (about cricoid cartilage level, about 3-4 cm above the  
52  
53 clavicle), an ultrasound probe (50 mm high frequency linear array) warped with sterilize  
54  
55  
56  
57  
58  
59  
60

1  
2  
3  
4 plastic dress will be placed in the transverse position at the previous measuring mark.

5  
6 The scanning depth will be 3-4 cm and the focusing position will be 2-3 cm. After  
7  
8 confirming the sternocleidomastoid muscle, we move the probe backwards until the  
9  
10 posterior border of the sternocleidomastoid muscle in the center of the screen, and  
11  
12 identify the investing fascia and prevertebral fascia from the shallow to the deep layer.  
13  
14

15  
16 Using long-axis in-plane technique, a 50 mm long, 20 G short bevel needle will be  
17  
18 inserted from the lateral border of sternocleidomastoid muscle. Under guidance of  
19  
20 ultrasound, we will confirm the needle tip locating between the deep layer of investing  
21  
22 fascia and the superficial layer of prevertebral fascia, close to the border of  
23  
24 sternocleidomastoid muscle. After negative aspiration of blood and cerebrospinal fluid,  
25  
26 1 ml of 0.5% ropivacaine will be administered to confirm the location of the needle tip.  
27  
28 Then, 10mL of 0.5% ropivacaine will be infused on the superficial layer of prevertebral  
29  
30 fascia. The puncture site will be covered with opaque infusion dressing after completing  
31  
32 of SCBP.  
33  
34  
35  
36  
37  
38  
39

40  
41 In the control group, the puncture will also be performed by ultrasound guidance,  
42  
43 covered with opaque infusion dressing but performed without infusion.  
44

#### 45 46 ***Concomitant treatment***

47  
48 Routine monitoring will include electrocardiograph (ECG), pulse oxygen saturation,  
49  
50 noninvasive blood pressure (NIBP), body temperature, minimal alveolar concentration  
51  
52 (MAC) of inhalation agent and bispectral index (BIS). Continuous arterial pressure,  
53  
54 urine output and end-tidal carbon dioxide partial pressure (ETCO<sub>2</sub>) will be monitored  
55  
56 after anesthesia induction. All patients will be premedicated with midazolam (0.05  
57  
58  
59  
60

1  
2  
3  
4 mg/kg) intravenously 5 minutes before anesthesia induction. Anesthesia will be  
5  
6 induced with propofol (1.5 to 2.5 mg/kg), sufentanil (0.3 to 0.4 µg/kg), and rocuronium  
7  
8 (0.9 mg/kg) or cisatracurium (0.2 mg/kg). After tracheal intubation, mechanical  
9  
10 ventilation will be performed, at a tidal volume 6-8 ml/kg, a respiratory rate of 12-  
11  
12 15/min, an I:E of 1:2, a 50% fraction of inspired oxygen in the air and fresh gas at a  
13  
14 flow rate of 2 L/min to maintain the ET<sub>CO</sub><sub>2</sub> between 35 and 40 mmHg.  
15  
16  
17

18  
19 Anesthesia will be maintained with combined intravenous anesthesia and inhalational  
20  
21 anesthesia. Along with the inhalational anesthesia maintained with 0.5 MAC, infusion  
22  
23 of remifentanyl (0.1-0.4 µg/kg/min) and propofol (3-8 mg/kg/h) will be maintained to  
24  
25 keep BIS values between 40 and 50. No muscle relaxant will be used during the  
26  
27 procedure to meet intraoperative electrophysiological neuro-monitoring  
28  
29 requirements. No additional local anesthetics or analgesics will be administered  
30  
31 intraoperatively. Propofol and remifentanyl infusion will be discontinued at the end of  
32  
33 surgery.  
34  
35  
36  
37  
38  
39

40  
41 The patients will be extubated after full recovery from anesthesia and transferred to the  
42  
43 post-anesthesia care unit (PACU). The patients will remain in the PACU for 120  
44  
45 minutes and receive nasal oxygen inhalation with ECG, NIBP, pulse oximetry  
46  
47 monitoring. Sufentanyl-loaded electric analgesia pumps (Rhythmic Plus, Micrel  
48  
49 Medical Devices S.A., Greece-European Union) which pre-programmed by the  
50  
51 research assistant will be connected to the patients for routine postoperative analgesia.  
52  
53  
54 The patient controlled intravenous analgesia (PCIA) pumps will be filled with  
55  
56 sufentanyl (100 µg) and ondansetron (16 mg) diluted in 100 mL of 0.9% saline. This  
57  
58  
59  
60

1  
2  
3  
4 regimen will provide a bolus of 1 µg sufentanyl on demand with a 10-minute lockout  
5  
6 time, without continuous background infusion dose or loading dose. Insufficient  
7  
8 postoperative analgesia will be defined as an NRS score >4 lasting over 15 minutes or >  
9  
10  
11  
12 6. Once inadequate postoperative analgesia was confirmed, patients will receive rescue  
13  
14 analgesic. If the patient vomit or report nausea for more than 15 minutes, rescue  
15  
16 antiemetic will be administered. The type, the frequency and the dose of rescue  
17  
18 analgesic and antiemetic will be recorded. The reason for administration will also be  
19  
20 recorded giving drugs with analgesic or/and antiemetic.  
21  
22  
23

24  
25 Physiologic parameters, the total doses of anesthetic drugs and vasoactive drugs will be  
26  
27 recorded. Fluid input and output will also be closely monitored and recorded.  
28  
29

30 Anesthesia and surgery duration will be summarized.  
31

### 32 ***Outcomes and safety measures***

33  
34  
35 The aim of this study is to observe the effect of SCPB on postoperative analgesia in  
36  
37 patients with suboccipital retrosigmoid craniotomy. During preoperative visits, patients  
38  
39 will be informed of the score how to assess the pain, analgesic satisfaction, sleep quality  
40  
41 and anesthesia recovery quality.  
42  
43  
44

### 45 ***Primary outcome***

46  
47  
48 The primary outcome is the cumulative consumption of sufentanil by the PCIA within  
49  
50 24 hours after surgery. The primary outcomes will be assessed by trained research  
51  
52 assistants at 24 hours after surgery through reading the PCIA data.  
53  
54

### 55 ***Secondary outcomes***

56  
57  
58 The secondary outcomes include the other efficacy parameters and safety outcomes.  
59  
60

1  
2  
3  
4 1) The first-time point that the patients use PCIA, the total and effective requests of  
5  
6 PCIA at 5 different time points after surgery (1, 2, 4, 24, 48 hours) and the cumulative  
7  
8 consumption of sufentanil at 4 different time points (1, 2, 4, 48 hours) after surgery.  
9

10  
11 2) Pain severity score. Pain will be assessed at 6 time-points after surgery. The degree  
12  
13 of surgical incision pain will be assessed at rest and on movement NRS pain score.  
14  
15 Insufficient postoperative analgesia is defined as an NRS score that exceeds 4 lasted  
16  
17 for 15 minutes or exceeds 6. Information of analgesic drugs administrated in case of  
18  
19 insufficient postoperative analgesia was also recorded. Pain severity score in NRS is 0  
20  
21 to 10, 0 representing no pain and 10 representing worst pain imaginable.  
22  
23  
24  
25

26  
27 3) Anesthesia recovery quality score. Anesthesia Steward Emergence Scale [19] will be  
28  
29 used at 1 and 2 hours after surgery to evaluate the recovery quality of anesthesia.  
30  
31 Anesthesia recovery quality score will be assessed by the Anesthesia Steward  
32  
33 Emergence Scale which is divided into three parts: the degree of wakefulness (2 points  
34  
35 for complete recovery, 1 point for response to stimulation, 0 point for no response to  
36  
37 stimulation), the degree of airway patency (2 points for cough according to the doctor's  
38  
39 order, 1 point for maintenance of airway patency without support, 0 point for support  
40  
41 required for respiratory tract) and the degree of limb mobility (2 points for conscious  
42  
43 activities of limbs, 1 point for unconscious activities of limbs, 0 point for no activities  
44  
45 of limbs).  
46  
47  
48  
49  
50  
51  
52

53  
54 4) Analgesic satisfaction and sleep quality. Patient satisfaction with overall pain  
55  
56 management and sleep quality will be evaluated separately at 24 and 48 hours after  
57  
58 surgery using NRS. Analgesic satisfaction score in NRS is 0 to 10, 0 representing  
59  
60

1  
2  
3  
4 extremely dissatisfied and 10 representing extremely satisfied. Sleep quality score in  
5  
6 NRS is scored as 0 to 10, 0 representing unable to sleep and 10 representing deep sleep.

7  
8  
9 5) Adverse events. Ramsay score [20] and Nausea and vomiting scores as well other  
10  
11 adverse events (dizziness, fatigue, hematoma, local anesthetic poisoning and  
12  
13 hoarseness) will be evaluated at the 5 time points after surgery.  
14  
15

### 16 17 ***Sample size calculation***

18  
19 We estimate the sample size according to the primary outcome of postoperative-24-  
20  
21 hour PCIA sufentanil consumption by using PASS 2011 software (NCSS LLC). Based  
22  
23 on the previous literature [21], Akcil et al. demonstrated the mean [95% confidence  
24  
25 interval (CI)] postoperative cumulative morphine consumption was 30 mg (25 to 35) in  
26  
27 the scalp block group and 50 mg (40 to 60) in the control group. Considering that 1 mg  
28  
29 morphine is equivalent to 1 µg sufentanil, we estimated the scalp block in their study  
30  
31 reduced PCIA sufentanil consumption by 20 µg within postoperative 24 hours. In the  
32  
33 routine practice without SCBP, we also apply PCIA for the patients undergoing  
34  
35 craniotomy via suboccipital retrosigmoid approach with the dosage of sufentanil as 50  
36  
37 ug during the first 24 hours after surgery. So, we estimated the effect size of mean as  
38  
39 20 µg with the standard deviation of 30 µg for the SCBP group comparing with the  
40  
41 control group. The sample size of 106 patients will be sufficient to detect the difference  
42  
43 at a two-tailed significant level of 0.05 and a power of 90% using Student t test, with a  
44  
45 drop-out rate of 10%.  
46  
47  
48  
49  
50  
51  
52  
53  
54  
55

### 56 57 ***Statistical analysis***

58  
59  
60

1  
2  
3  
4 Analysis will be done using SPSS software (version 23.0). We will apply the intention-  
5  
6 to-treat and per-protocol analysis on the primary outcome. If necessary, consider the  
7  
8 number of missing outcomes as poor prognosis and conduct sensitivity analysis. The  
9  
10 continuous variables will be summarized with mean (standard deviation) or median  
11  
12 (interquartile range, IQR), depending on normality determined with Shapiro-Wilk test.  
13  
14 Normally distributed and continuous variables will be compared with Student's t-test,  
15  
16 while skewed variables will be compared using the Mann-Whitney U test. The  
17  
18 categorical variables will be described as counts ( percentages ) and compared with  
19  
20 chi-square analysis or Fisher's exact test. The repeated measurement data will be  
21  
22 analyzed by repeated measurements of variance analysis. Bonferroni correction will be  
23  
24 used for multiple comparisons. A significance level of  $P < 0.05$  was used to indicate  
25  
26 statistical significance.  
27  
28  
29  
30  
31  
32  
33

### 34 ***Reporting of adverse events***

35  
36 All adverse events will be closely monitored until a stable situation has been reached.  
37  
38 The chief investigator will be informed of any serious adverse events and determine the  
39  
40 severity and causality of these events. All adverse events associated with this study will  
41  
42 be recorded and reported to the ethics committee as part of the annual report. The chief  
43  
44 investigator will be responsible for a getting the details about causes of AEs, treatment  
45  
46 measures, prognosis, and reporting serious adverse events to the Ethics Committee  
47  
48 immediately.  
49  
50  
51  
52  
53  
54  
55

### 56 ***Protocol Amendment***



1  
2  
3  
4 The chief investigator will be responsible for any decision to amend the protocol. If  
5  
6 there is any modification (eg, changes to eligibility criteria, outcomes, analyses) the  
7  
8 principle investigator will communicate and gain approval from the China Ethics  
9  
10 Committee of Registering Clinical Trials prior to implementation, and communicate  
11  
12 with relevant other parties (eg, investigators, trial participants, trial registries, journals,  
13  
14 regulators)  
15  
16  
17  
18  
19

### 20 ***Discussion***

21  
22 An ideal analgesic should be able to provide analgesia for entire surgical period and  
23  
24 with minimal or no systemic changes. Meanwhile, the interference on consciousness  
25  
26 and postoperative neurological function should be minimized during the recovery and  
27  
28 evaluation period. At present, PCIA with opioid is the most common analgesia modality  
29  
30 for patients received craniotomy [21, 22]. However, undesirable effects of opioids,  
31  
32 including respiratory depression, nausea, vomiting, urinary retention, etc., not only  
33  
34 bring discomfort to patients, but also affect neurological function evaluation by  
35  
36 neurosurgeons[23]. Besides opioids, nonsteroidal anti-inflammatory drugs (NSAIDs),  
37  
38 another common analgesia agent is not suitable for postoperative analgesia after  
39  
40 neurosurgery due to its effect on coagulation [24]. Gabapentin is an adjuvant  
41  
42 antiepileptic agent with some analgesic effects. Our previous research demonstrated  
43  
44 that oral gabapentin relieved early postoperative pain, with increased depth of sedation  
45  
46 in post-craniotomy, which indicated gabapentin was not the appropriate candidate for  
47  
48 postoperative neurosurgical analgesia[25]. Therefore, it is necessary to explore an ideal  
49  
50  
51  
52  
53  
54  
55  
56  
57  
58  
59  
60

1  
2  
3  
4 analgesic modality that can effectively provide surgical analgesia with minimal or no  
5  
6 systemic changes for this population.  
7

8  
9 This is a prospective, single-center, randomized, parallel-group controlled trial to assess  
10  
11 the efficacy and safety of preoperative ultrasound-guided SCBP for analgesia in  
12  
13 patients undergoing suboccipital retrosigmoid craniotomy. With the continuous  
14  
15 development of ultrasound guidance technology, utilization of visualized nerve block  
16  
17 became more popular in clinical practice [15, 16, 18]. We design the current study to  
18  
19 use ultrasound-guided SCBP to explore the efficacy and safety of postoperative  
20  
21 analgesia in patients undergoing suboccipital sigmoid approach for craniotomy.  
22  
23 Although ultrasound guidance greatly improves the efficacy and safety of the block, we  
24  
25 still can't ignore the risk associated with the cervical plexus block. Therefore, in this  
26  
27 study we will observe these complications such as hematoma, dizziness, fatigue,  
28  
29 hematoma, local anesthetic poisoning and hoarseness. At the same time, in order to  
30  
31 ensure the accuracy and consistency of ultrasound-guided puncture, the  
32  
33 anesthesiologists who will receive specific training before the first patients are enrolled,  
34  
35 the corresponding ultrasound image data of puncture will be preserved, so as to ensure  
36  
37 the uniformity of block effect in each patient.  
38  
39

40  
41 Although SCPB may reduce postcraniotomy pain, it is not routinely used in our current  
42  
43 clinical practice. To maintain the analgesic effect on the patients in the control group,  
44  
45 the patients will be given the same analgesic dosage regimen following the clinical  
46  
47 routine of our medical center, which fully ensure that the patients are safe and painless  
48  
49  
50  
51  
52  
53  
54  
55  
56  
57  
58  
59  
60

1  
2  
3  
4 during surgery. Postoperative PCIA analgesia will be routinely given to all patients,  
5  
6 and rescue analgesics will be promptly administered when analgesia is insufficient.  
7

8  
9 Our study will improve the ideal analgesic regimen for patients undergoing suboccipital  
10  
11 retrosigmoid craniotomy, so as to reduce perioperative stress response and  
12  
13 complications, improve patient satisfaction and early recovery.  
14  
15

16  
17 ***Patient and public involvement:*** Patients and the public were not directly  
18  
19 consulted in the development of the research question or outcome measures.  
20  
21 Patients were not involved in the design, the recruitment and conduct of the  
22  
23 study. At the completion of this trial, a manuscript will be prepared to present  
24  
25 the trial results. Results of the final study will be disseminated to all study  
26  
27 participants through their preferred method of communication indicated at the  
28  
29 time of enrollment. The burden of intervention will not be taken by participants  
30  
31 themselves.  
32  
33  
34  
35  
36  
37

38  
39 ***Acknowledgements:*** The authors would like to express their sincere gratitude to the  
40  
41 colleagues of the Department of Anesthesiology and the Department of Neurosurgery,  
42  
43 Beijing Tiantan Hospital, for their support and cooperation. The authors also would like  
44  
45 to express their sincere gratitude to patient advisers for their cooperation in completing  
46  
47 the trial.  
48  
49

50  
51 ***Author Contributions:*** KP, MZ, JD, DXW, XY, SL, YMP: conceived the study,  
52  
53 contributed to the study design and analytical plans. MZ: drafted the protocol. All  
54  
55 authors read and approved the final protocol.  
56  
57  
58  
59  
60

1  
2  
3  
4 **Funding:** This work was supported by Beijing Municipal Administration of Hospitals  
5  
6 Clinical Medical Development of Special Funding Support (grant number:  
7  
8 ZYLX201708) and Ascent Plan (grant number: DFL20180502), Capital Development  
9  
10 Research Fund Project (grant number: 2018-2-2044).  
11  
12

13  
14 **Competing interests:** None declared.  
15  
16

17 **Ethics approval:** This study is approved by the Ethics Review Committee of China  
18  
19 Registered Clinical Trials (Ethics Review No. ChiECRCT-20190047).  
20  
21

22 **Data sharing statement** The manuscript is a protocol for a randomized controlled trial,  
23  
24 which does not include data.  
25  
26  
27  
28  
29  
30  
31  
32  
33  
34  
35  
36  
37  
38  
39  
40  
41  
42  
43  
44  
45  
46  
47  
48  
49  
50  
51  
52  
53  
54  
55  
56  
57  
58  
59  
60

## References

1. Dunbar PJ, Visco E, Lam AM: **Craniotomy procedures are associated with less analgesic requirements than other surgical procedures.** *Anesthesia and analgesia* 1999, **88**(2):335-340.
2. Maxwell LG, Buckley GM, Kudchadkar SR, Ely E, Stebbins EL, Dube C, Morad A, Jastaniah EA, Sethna NF, Yaster M: **Pain management following major intracranial surgery in pediatric patients: a prospective cohort study in three academic children's hospitals.** *Paediatric anaesthesia* 2014, **24**(11):1132-1140.
3. Molnar L, Simon E, Nemes R, Fulesdi B, Molnar C: **Postcraniotomy headache.** *J Anesth* 2014, **28**(1):102-111.
4. Gottschalk A, Berkow LC, Stevens RD, Mirski M, Thompson RE, White ED, Weingart JD, Long DM, Yaster M: **Prospective evaluation of pain and analgesic use following major elective intracranial surgery.** *Journal of neurosurgery* 2007, **106**(2):210-216.
5. Vadivelu N, Kai AM, Tran D, Kodumudi G, Legler A, Ayrian E: **Options for perioperative pain management in neurosurgery.** *Journal of pain research* 2016, **9**:37-47.
6. Rimaaja T, Haanpaa M, Blomstedt G, Farkkila M: **Headaches after acoustic neuroma surgery.** *Cephalalgia* 2007, **27**(10):1128-1135.
7. **Acute and chronic pain following craniotomy: a review.** *Anaesthesia* 2005.
8. Chowdhury T, Garg R, Sheshadri V, Venkatraghavan L, Bergese SD, Cappellani RB, Schaller B: **Perioperative Factors Contributing the Post-Craniotomy Pain: A Synthesis of Concepts.** *Front Med (Lausanne)* 2017, **4**:23.
9. Potters JW, Klimek M: **Local anesthetics for brain tumor resection: current perspectives.** *Local and regional anesthesia* 2018, **11**:1-8.
10. Chaki T, Sugino S, Janicki PK, Ishioka Y, Hatakeyama Y, Hayase T, Kaneuchi-Yamashita M, Kohri N, Yamakage M: **Efficacy and Safety of a Lidocaine and Ropivacaine Mixture for Scalp Nerve Block and Local Infiltration Anesthesia in Patients Undergoing Awake Craniotomy.** *Journal of neurosurgical anesthesiology* 2016, **28**(1):1-5.

11. Hwang JY, Bang JS, Oh CW, Joo JD, Park SJ, Do SH, Yoo YJ, Ryu JH: **Effect of scalp blocks with levobupivacaine on recovery profiles after craniotomy for aneurysm clipping: a randomized, double-blind, and controlled study.** *World neurosurgery* 2015, **83**(1):108-113.
12. Osborn I, Sebeo J: **"Scalp block" during craniotomy: a classic technique revisited.** *Journal of neurosurgical anesthesiology* 2010, **22**(3):187-194.
13. Girard F, Quentin C, Charbonneau S, Ayoub C, Boudreault D, Chouinard P, Ruel M, Moundjian R: **Superficial cervical plexus block for transitional analgesia in infratentorial and occipital craniotomy: a randomized trial.** *Can J Anaesth* 2010, **57**(12):1065-1070.
14. Re M, Blanco J, Gomez de Segura IA: **Ultrasound-Guided Nerve Block Anesthesia.** *Vet Clin North Am Food Anim Pract* 2016, **32**(1):133-147.
15. Barrington MJ, Uda Y: **Did ultrasound fulfill the promise of safety in regional anesthesia?** *Current opinion in anaesthesiology* 2018, **31**(5):649-655.
16. Hoydonckx Y, Peng P: **Echo-guided invasive pain therapy: indications and limitations.** *Current opinion in anaesthesiology* 2018, **31**(6):739-748.
17. Ho B, De Paoli M: **Use of Ultrasound-Guided Superficial Cervical Plexus Block for Pain Management in the Emergency Department.** *J Emerg Med* 2018, **55**(1):87-95.
18. Senapathi TGA, Widnyana IMG, Aribawa I, Wiryana M, Sinardja IK, Nada IKW, Jaya A, Putra I: **Ultrasound-guided bilateral superficial cervical plexus block is more effective than landmark technique for reducing pain from thyroidectomy.** *J Pain Res* 2017, **10**:1619-1622.
19. Steward DJ: **A simplified scoring system for the post-operative recovery room.** *Can Anaesth Soc J* 1975, **22**(1):111-113.
20. Porzio G, Aielli F, Verna L, Micolucci G, Aloisi P, Ficorella C: **Efficacy and safety of deep, continuous palliative sedation at home: a retrospective, single-institution study.** *Support Care Cancer* 2010, **18**(1):77-81.
21. Akcil EF, Dilmen OK, Vehid H, Ibisoglu LS, Tunali Y: **Which one is more effective for analgesia in infratentorial craniotomy? The scalp block or local anesthetic infiltration.** *Clin Neurol Neurosurg* 2017, **154**:98-103.

- 1  
2  
3  
4  
5  
6  
7  
8  
9  
10  
11  
12  
13  
14  
15  
16  
17  
18  
19  
20  
21  
22  
23  
24  
25  
26  
27  
28  
29  
30  
31  
32  
33  
34  
35  
36  
37  
38  
39  
40  
41  
42  
43  
44  
45  
46  
47  
48  
49  
50  
51  
52  
53  
54  
55  
56  
57  
58  
59  
60
22. Song J, Li L, Yu P, Gao T, Liu K: **Preemptive scalp infiltration with 0.5% ropivacaine and 1% lidocaine reduces postoperative pain after craniotomy.** *Acta Neurochir (Wien)* 2015, **157**(6):993-998.
23. Dunn LK, Naik BI, Nemergut EC, Durieux ME: **Post-Craniotomy Pain Management: Beyond Opioids.** *Curr Neurol Neurosci Rep* 2016, **16**(10):93.
24. Jian M, Li X, Wang A, Zhang L, Han R, Gelb AW: **Flurbiprofen and hypertension but not hydroxyethyl starch are associated with post-craniotomy intracranial haematoma requiring surgery.** *British journal of anaesthesia* 2014, **113**(5):832-839.
25. Zeng M, Dong J, Lin N, Zhang W, Zhang K, Peng K, Wang D, Zhao Y, Peng Y, Han R: **Preoperative Gabapentin Administration Improves Acute Postoperative Analgesia in Patients Undergoing Craniotomy: A Randomized Controlled Trial.** *Journal of neurosurgical anesthesiology* 2018.

1  
2  
3  
4 **Figure legends**  
5  
6  
7

8 **Figure 1.** Consolidated Standards of Reporting Trials (CONSORT) flow diagram  
9

10  
11 **Figure 2.** Standard Protocol Items: Recommendations for Interventional Trials  
12

13  
14  
15 (SPIRIT)  
16  
17  
18  
19  
20  
21  
22  
23  
24  
25  
26  
27  
28  
29  
30  
31  
32  
33  
34  
35  
36  
37  
38  
39  
40  
41  
42  
43  
44  
45  
46  
47  
48  
49  
50  
51  
52  
53  
54  
55  
56  
57  
58  
59  
60

For peer review only



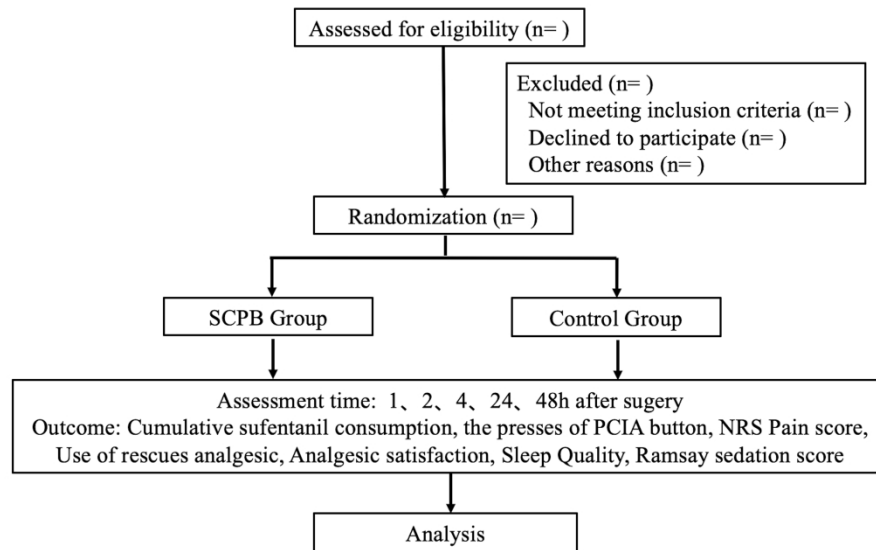

Consolidated Standards of Reporting Trials (CONSORT) flow diagram

| STUDY PERIOD                             |           |             |                       |   |   |    |    |
|------------------------------------------|-----------|-------------|-----------------------|---|---|----|----|
| TIMEPOINT                                | Enrolment | Allocation  | Post-allocation       |   |   |    |    |
|                                          | -1day     | Surgery day | Post-craniotomy(hour) |   |   |    |    |
|                                          |           |             | 1                     | 2 | 4 | 24 | 48 |
| <b>ENROLMENT</b>                         |           |             |                       |   |   |    |    |
| Eligibility screen                       | X         |             |                       |   |   |    |    |
| Informed consent                         | X         |             |                       |   |   |    |    |
| Allocation                               |           | X           |                       |   |   |    |    |
| <b>INTERVENTIONS</b>                     |           |             |                       |   |   |    |    |
| SCPB group                               |           | X           |                       |   |   |    |    |
| Control group                            |           | X           |                       |   |   |    |    |
| <b>ASSESSMENTS</b>                       |           |             |                       |   |   |    |    |
| Baseline variables                       |           | X           | X                     | X | X | X  | X  |
| Intraoperative data                      |           | X           |                       |   |   |    |    |
| Anesthesia recovery quality score        |           |             | X                     | X |   |    |    |
| Ramsay Score                             |           |             | X                     | X | X | X  | X  |
| Cumulative sufentanil consumption of PCA |           |             | X                     | X | X | X  | X  |
| Requests of PCA                          |           |             | X                     | X | X | X  | X  |
| Dose and frequency of rescue analgesic   |           |             | X                     | X | X | X  | X  |
| Pain intensity (NRS)                     |           |             | X                     | X | X | X  | X  |
| Analgesia Satisfaction                   |           |             |                       |   |   | X  | X  |
| Sleep quality                            |           |             |                       |   |   | X  | X  |
| Adverse Event                            |           |             | X                     | X | X | X  | X  |

Standard Protocol Items- Recommendations for Interventional Trials

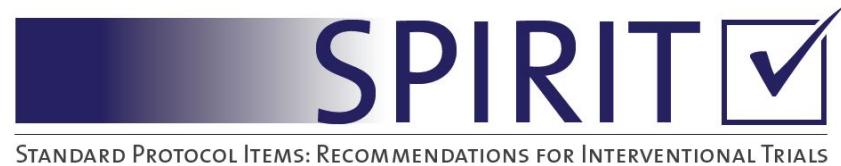

SPIRIT 2013 Checklist: Recommended items to address in a clinical trial protocol and related documents\*

**Checklist for Ultrasound guided superficial cervical plexus block for analgesia in patients undergoing craniotomy via suboccipital retrosigmoid approach: protocol of a randomized controlled trial**

| Section/item                      | Item No | Description                                                                                                                                                                                                                                                                              | Addressed on page number |
|-----------------------------------|---------|------------------------------------------------------------------------------------------------------------------------------------------------------------------------------------------------------------------------------------------------------------------------------------------|--------------------------|
| <b>Administrative information</b> |         |                                                                                                                                                                                                                                                                                          |                          |
| Title                             | 1       | Descriptive title identifying the study design, population, interventions, and, if applicable, trial acronym                                                                                                                                                                             | <u>1</u>                 |
| Trial registration                | 2a      | Trial identifier and registry name. If not yet registered, name of intended registry                                                                                                                                                                                                     | <u>2</u>                 |
|                                   | 2b      | All items from the World Health Organization Trial Registration Data Set                                                                                                                                                                                                                 | <u>2</u>                 |
| Protocol version                  | 3       | Date and version identifier                                                                                                                                                                                                                                                              | <u>2</u>                 |
| Funding                           | 4       | Sources and types of financial, material, and other support                                                                                                                                                                                                                              | <u>17&amp;18</u>         |
| Roles and responsibilities        | 5a      | Names, affiliations, and roles of protocol contributors                                                                                                                                                                                                                                  | <u>1 &amp; 17</u>        |
|                                   | 5b      | Name and contact information for the trial sponsor                                                                                                                                                                                                                                       | <u>1</u>                 |
|                                   | 5c      | Role of study sponsor and funders, if any, in study design; collection, management, analysis, and interpretation of data; writing of the report; and the decision to submit the report for publication, including whether they will have ultimate authority over any of these activities | <u>17&amp;18</u>         |
|                                   | 5d      | Composition, roles, and responsibilities of the coordinating centre, steering committee, endpoint adjudication committee, data management team, and other individuals or groups overseeing the trial, if applicable (see Item 21a for data monitoring committee)                         | <u>Not Applicable</u>    |

|    |                                                           |     |                                                                                                                                                                                                                                                                                                                                                                                |                                                                                                                                                                                                |            |
|----|-----------------------------------------------------------|-----|--------------------------------------------------------------------------------------------------------------------------------------------------------------------------------------------------------------------------------------------------------------------------------------------------------------------------------------------------------------------------------|------------------------------------------------------------------------------------------------------------------------------------------------------------------------------------------------|------------|
| 1  | <b>Introduction</b>                                       |     |                                                                                                                                                                                                                                                                                                                                                                                |                                                                                                                                                                                                |            |
| 2  |                                                           |     |                                                                                                                                                                                                                                                                                                                                                                                |                                                                                                                                                                                                |            |
| 3  | Background and rationale                                  | 6a  | Description of research question and justification for undertaking the trial, including summary of relevant studies (published and unpublished) examining benefits and harms for each intervention                                                                                                                                                                             | <u>4-6</u>                                                                                                                                                                                     |            |
| 4  |                                                           |     |                                                                                                                                                                                                                                                                                                                                                                                |                                                                                                                                                                                                |            |
| 5  |                                                           |     |                                                                                                                                                                                                                                                                                                                                                                                |                                                                                                                                                                                                |            |
| 6  |                                                           | 6b  | Explanation for choice of comparators                                                                                                                                                                                                                                                                                                                                          | <u>4-6</u>                                                                                                                                                                                     |            |
| 7  |                                                           |     |                                                                                                                                                                                                                                                                                                                                                                                |                                                                                                                                                                                                |            |
| 8  | Objectives                                                | 7   | Specific objectives or hypotheses                                                                                                                                                                                                                                                                                                                                              | <u>6</u>                                                                                                                                                                                       |            |
| 9  |                                                           |     |                                                                                                                                                                                                                                                                                                                                                                                |                                                                                                                                                                                                |            |
| 10 | Trial design                                              | 8   | Description of trial design including type of trial (eg, parallel group, crossover, factorial, single group), allocation ratio, and framework (eg, superiority, equivalence, noninferiority, exploratory)                                                                                                                                                                      | <u>6-7</u>                                                                                                                                                                                     |            |
| 11 |                                                           |     |                                                                                                                                                                                                                                                                                                                                                                                |                                                                                                                                                                                                |            |
| 12 |                                                           |     |                                                                                                                                                                                                                                                                                                                                                                                |                                                                                                                                                                                                |            |
| 13 |                                                           |     |                                                                                                                                                                                                                                                                                                                                                                                |                                                                                                                                                                                                |            |
| 14 | <b>Methods: Participants, interventions, and outcomes</b> |     |                                                                                                                                                                                                                                                                                                                                                                                |                                                                                                                                                                                                |            |
| 15 |                                                           |     |                                                                                                                                                                                                                                                                                                                                                                                |                                                                                                                                                                                                |            |
| 16 | Study setting                                             | 9   | Description of study settings (eg, community clinic, academic hospital) and list of countries where data will be collected. Reference to where list of study sites can be obtained                                                                                                                                                                                             | <u>6</u>                                                                                                                                                                                       |            |
| 17 |                                                           |     |                                                                                                                                                                                                                                                                                                                                                                                |                                                                                                                                                                                                |            |
| 18 |                                                           |     |                                                                                                                                                                                                                                                                                                                                                                                |                                                                                                                                                                                                |            |
| 19 | Eligibility criteria                                      | 10  | Inclusion and exclusion criteria for participants. If applicable, eligibility criteria for study centres and individuals who will perform the interventions (eg, surgeons, psychotherapists)                                                                                                                                                                                   | <u>7</u>                                                                                                                                                                                       |            |
| 20 |                                                           |     |                                                                                                                                                                                                                                                                                                                                                                                |                                                                                                                                                                                                |            |
| 21 |                                                           |     |                                                                                                                                                                                                                                                                                                                                                                                |                                                                                                                                                                                                |            |
| 22 | Interventions                                             | 11a | Interventions for each group with sufficient detail to allow replication, including how and when they will be administered                                                                                                                                                                                                                                                     | <u>8-9</u>                                                                                                                                                                                     |            |
| 23 |                                                           |     |                                                                                                                                                                                                                                                                                                                                                                                |                                                                                                                                                                                                |            |
| 24 |                                                           |     | 11b                                                                                                                                                                                                                                                                                                                                                                            | Criteria for discontinuing or modifying allocated interventions for a given trial participant (eg, drug dose change in response to harms, participant request, or improving/worsening disease) | <u>8-9</u> |
| 25 |                                                           |     |                                                                                                                                                                                                                                                                                                                                                                                |                                                                                                                                                                                                |            |
| 26 |                                                           |     |                                                                                                                                                                                                                                                                                                                                                                                |                                                                                                                                                                                                |            |
| 27 |                                                           | 11c | Strategies to improve adherence to intervention protocols, and any procedures for monitoring adherence (eg, drug tablet return, laboratory tests)                                                                                                                                                                                                                              | <u>8-9</u>                                                                                                                                                                                     |            |
| 28 |                                                           |     |                                                                                                                                                                                                                                                                                                                                                                                |                                                                                                                                                                                                |            |
| 29 |                                                           |     |                                                                                                                                                                                                                                                                                                                                                                                |                                                                                                                                                                                                |            |
| 30 |                                                           |     |                                                                                                                                                                                                                                                                                                                                                                                |                                                                                                                                                                                                |            |
| 31 |                                                           |     |                                                                                                                                                                                                                                                                                                                                                                                |                                                                                                                                                                                                |            |
| 32 | Outcomes                                                  | 11d | Relevant concomitant care and interventions that are permitted or prohibited during the trial                                                                                                                                                                                                                                                                                  | <u>9-11</u>                                                                                                                                                                                    |            |
| 33 |                                                           |     |                                                                                                                                                                                                                                                                                                                                                                                |                                                                                                                                                                                                |            |
| 34 |                                                           | 12  | Primary, secondary, and other outcomes, including the specific measurement variable (eg, systolic blood pressure), analysis metric (eg, change from baseline, final value, time to event), method of aggregation (eg, median, proportion), and time point for each outcome. Explanation of the clinical relevance of chosen efficacy and harm outcomes is strongly recommended | <u>11-12</u>                                                                                                                                                                                   |            |
| 35 |                                                           |     |                                                                                                                                                                                                                                                                                                                                                                                |                                                                                                                                                                                                |            |
| 36 |                                                           |     |                                                                                                                                                                                                                                                                                                                                                                                |                                                                                                                                                                                                |            |
| 37 | Participant timeline                                      | 13  | Time schedule of enrolment, interventions (including any run-ins and washouts), assessments, and visits for participants. A schematic diagram is highly recommended (see Figure)                                                                                                                                                                                               | <u>see Figure 2</u>                                                                                                                                                                            |            |
| 38 |                                                           |     |                                                                                                                                                                                                                                                                                                                                                                                |                                                                                                                                                                                                |            |
| 39 |                                                           |     |                                                                                                                                                                                                                                                                                                                                                                                |                                                                                                                                                                                                |            |
| 40 |                                                           |     |                                                                                                                                                                                                                                                                                                                                                                                |                                                                                                                                                                                                |            |
| 41 |                                                           |     |                                                                                                                                                                                                                                                                                                                                                                                |                                                                                                                                                                                                |            |
| 42 |                                                           |     |                                                                                                                                                                                                                                                                                                                                                                                |                                                                                                                                                                                                |            |
| 43 |                                                           |     |                                                                                                                                                                                                                                                                                                                                                                                |                                                                                                                                                                                                |            |
| 44 |                                                           |     |                                                                                                                                                                                                                                                                                                                                                                                |                                                                                                                                                                                                |            |
| 45 |                                                           |     |                                                                                                                                                                                                                                                                                                                                                                                |                                                                                                                                                                                                |            |
| 46 |                                                           |     |                                                                                                                                                                                                                                                                                                                                                                                |                                                                                                                                                                                                |            |

|   |             |    |                                                                                                                                                                                       |           |
|---|-------------|----|---------------------------------------------------------------------------------------------------------------------------------------------------------------------------------------|-----------|
| 1 | Sample size | 14 | Estimated number of participants needed to achieve study objectives and how it was determined, including clinical and statistical assumptions supporting any sample size calculations | <u>13</u> |
| 2 |             |    |                                                                                                                                                                                       |           |
| 3 |             |    |                                                                                                                                                                                       |           |
| 4 | Recruitment | 15 | Strategies for achieving adequate participant enrolment to reach target sample size                                                                                                   | <u>6</u>  |
| 5 |             |    |                                                                                                                                                                                       |           |

### 6 **Methods: Assignment of interventions (for controlled trials)**

#### 7 Allocation:

|    |                                  |     |                                                                                                                                                                                                                                                                                                                                                          |          |
|----|----------------------------------|-----|----------------------------------------------------------------------------------------------------------------------------------------------------------------------------------------------------------------------------------------------------------------------------------------------------------------------------------------------------------|----------|
| 8  |                                  |     |                                                                                                                                                                                                                                                                                                                                                          |          |
| 9  |                                  |     |                                                                                                                                                                                                                                                                                                                                                          |          |
| 10 | Sequence generation              | 16a | Method of generating the allocation sequence (eg, computer-generated random numbers), and list of any factors for stratification. To reduce predictability of a random sequence, details of any planned restriction (eg, blocking) should be provided in a separate document that is unavailable to those who enrol participants or assign interventions | <u>7</u> |
| 11 |                                  |     |                                                                                                                                                                                                                                                                                                                                                          |          |
| 12 |                                  |     |                                                                                                                                                                                                                                                                                                                                                          |          |
| 13 |                                  |     |                                                                                                                                                                                                                                                                                                                                                          |          |
| 14 |                                  |     |                                                                                                                                                                                                                                                                                                                                                          |          |
| 15 |                                  |     |                                                                                                                                                                                                                                                                                                                                                          |          |
| 16 | Allocation concealment mechanism | 16b | Mechanism of implementing the allocation sequence (eg, central telephone; sequentially numbered, opaque, sealed envelopes), describing any steps to conceal the sequence until interventions are assigned                                                                                                                                                | <u>7</u> |
| 17 |                                  |     |                                                                                                                                                                                                                                                                                                                                                          |          |
| 18 |                                  |     |                                                                                                                                                                                                                                                                                                                                                          |          |
| 19 |                                  |     |                                                                                                                                                                                                                                                                                                                                                          |          |
| 20 | Implementation                   | 16c | Who will generate the allocation sequence, who will enrol participants, and who will assign participants to interventions                                                                                                                                                                                                                                | <u>7</u> |
| 21 |                                  |     |                                                                                                                                                                                                                                                                                                                                                          |          |
| 22 |                                  |     |                                                                                                                                                                                                                                                                                                                                                          |          |
| 23 |                                  |     |                                                                                                                                                                                                                                                                                                                                                          |          |
| 24 | Blinding (masking)               | 17a | Who will be blinded after assignment to interventions (eg, trial participants, care providers, outcome assessors, data analysts), and how                                                                                                                                                                                                                | <u>7</u> |
| 25 |                                  |     |                                                                                                                                                                                                                                                                                                                                                          |          |
| 26 |                                  |     |                                                                                                                                                                                                                                                                                                                                                          |          |
| 27 |                                  |     |                                                                                                                                                                                                                                                                                                                                                          |          |
| 28 |                                  | 17b | If blinded, circumstances under which unblinding is permissible, and procedure for revealing a participant's allocated intervention during the trial                                                                                                                                                                                                     | <u>7</u> |
| 29 |                                  |     |                                                                                                                                                                                                                                                                                                                                                          |          |
| 30 |                                  |     |                                                                                                                                                                                                                                                                                                                                                          |          |

### 31 **Methods: Data collection, management, and analysis**

|    |                         |     |                                                                                                                                                                                                                                                                                                                                                                                                              |                    |
|----|-------------------------|-----|--------------------------------------------------------------------------------------------------------------------------------------------------------------------------------------------------------------------------------------------------------------------------------------------------------------------------------------------------------------------------------------------------------------|--------------------|
| 32 |                         |     |                                                                                                                                                                                                                                                                                                                                                                                                              |                    |
| 33 |                         |     |                                                                                                                                                                                                                                                                                                                                                                                                              |                    |
| 34 | Data collection methods | 18a | Plans for assessment and collection of outcome, baseline, and other trial data, including any related processes to promote data quality (eg, duplicate measurements, training of assessors) and a description of study instruments (eg, questionnaires, laboratory tests) along with their reliability and validity, if known. Reference to where data collection forms can be found, if not in the protocol | <u>8 &amp; 12</u>  |
| 35 |                         |     |                                                                                                                                                                                                                                                                                                                                                                                                              |                    |
| 36 |                         |     |                                                                                                                                                                                                                                                                                                                                                                                                              |                    |
| 37 |                         |     |                                                                                                                                                                                                                                                                                                                                                                                                              |                    |
| 38 |                         |     |                                                                                                                                                                                                                                                                                                                                                                                                              |                    |
| 39 |                         | 18b | Plans to promote participant retention and complete follow-up, including list of any outcome data to be collected for participants who discontinue or deviate from intervention protocols                                                                                                                                                                                                                    | <u>11 &amp; 12</u> |
| 40 |                         |     |                                                                                                                                                                                                                                                                                                                                                                                                              |                    |
| 41 |                         |     |                                                                                                                                                                                                                                                                                                                                                                                                              |                    |
| 42 |                         |     |                                                                                                                                                                                                                                                                                                                                                                                                              |                    |

|    |                                 |     |                                                                                                                                                                                                                                                                                                                                       |                           |
|----|---------------------------------|-----|---------------------------------------------------------------------------------------------------------------------------------------------------------------------------------------------------------------------------------------------------------------------------------------------------------------------------------------|---------------------------|
| 1  | Data management                 | 19  | Plans for data entry, coding, security, and storage, including any related processes to promote data quality (eg, double data entry; range checks for data values). Reference to where details of data management procedures can be found, if not in the protocol                                                                     | <u>Not Applicable</u>     |
| 2  |                                 |     |                                                                                                                                                                                                                                                                                                                                       |                           |
| 3  |                                 |     |                                                                                                                                                                                                                                                                                                                                       |                           |
| 4  |                                 |     |                                                                                                                                                                                                                                                                                                                                       |                           |
| 5  | Statistical methods             | 20a | Statistical methods for analysing primary and secondary outcomes. Reference to where other details of the statistical analysis plan can be found, if not in the protocol                                                                                                                                                              | <u>14</u>                 |
| 6  |                                 |     |                                                                                                                                                                                                                                                                                                                                       |                           |
| 7  |                                 |     |                                                                                                                                                                                                                                                                                                                                       |                           |
| 8  |                                 | 20b | Methods for any additional analyses (eg, subgroup and adjusted analyses)                                                                                                                                                                                                                                                              | <u>14</u>                 |
| 9  |                                 |     |                                                                                                                                                                                                                                                                                                                                       |                           |
| 10 |                                 | 20c | Definition of analysis population relating to protocol non-adherence (eg, as randomised analysis), and any statistical methods to handle missing data (eg, multiple imputation)                                                                                                                                                       | <u>14</u>                 |
| 11 |                                 |     |                                                                                                                                                                                                                                                                                                                                       |                           |
| 12 |                                 |     |                                                                                                                                                                                                                                                                                                                                       |                           |
| 13 |                                 |     |                                                                                                                                                                                                                                                                                                                                       |                           |
| 14 | <b>Methods: Monitoring</b>      |     |                                                                                                                                                                                                                                                                                                                                       |                           |
| 15 |                                 |     |                                                                                                                                                                                                                                                                                                                                       |                           |
| 16 | Data monitoring                 | 21a | Composition of data monitoring committee (DMC); summary of its role and reporting structure; statement of whether it is independent from the sponsor and competing interests; and reference to where further details about its charter can be found, if not in the protocol. Alternatively, an explanation of why a DMC is not needed | <u>Not Applicable</u>     |
| 17 |                                 |     |                                                                                                                                                                                                                                                                                                                                       |                           |
| 18 |                                 |     |                                                                                                                                                                                                                                                                                                                                       |                           |
| 19 |                                 |     |                                                                                                                                                                                                                                                                                                                                       |                           |
| 20 |                                 |     |                                                                                                                                                                                                                                                                                                                                       |                           |
| 21 |                                 |     |                                                                                                                                                                                                                                                                                                                                       |                           |
| 22 |                                 | 21b | Description of any interim analyses and stopping guidelines, including who will have access to these interim results and make the final decision to terminate the trial                                                                                                                                                               | <u>Not Applicable</u>     |
| 23 |                                 |     |                                                                                                                                                                                                                                                                                                                                       |                           |
| 24 |                                 |     |                                                                                                                                                                                                                                                                                                                                       |                           |
| 25 | Harms                           | 22  | Plans for collecting, assessing, reporting, and managing solicited and spontaneously reported adverse events and other unintended effects of trial interventions or trial conduct                                                                                                                                                     | <u>14</u>                 |
| 26 |                                 |     |                                                                                                                                                                                                                                                                                                                                       |                           |
| 27 |                                 |     |                                                                                                                                                                                                                                                                                                                                       |                           |
| 28 | Auditing                        | 23  | Frequency and procedures for auditing trial conduct, if any, and whether the process will be independent from investigators and the sponsor                                                                                                                                                                                           | <u>Not Applicable</u>     |
| 29 |                                 |     |                                                                                                                                                                                                                                                                                                                                       |                           |
| 30 |                                 |     |                                                                                                                                                                                                                                                                                                                                       |                           |
| 31 |                                 |     |                                                                                                                                                                                                                                                                                                                                       |                           |
| 32 | <b>Ethics and dissemination</b> |     |                                                                                                                                                                                                                                                                                                                                       |                           |
| 33 |                                 |     |                                                                                                                                                                                                                                                                                                                                       |                           |
| 34 | Research ethics approval        | 24  | Plans for seeking research ethics committee/institutional review board (REC/IRB) approval                                                                                                                                                                                                                                             | <u>2 &amp; 6 &amp; 18</u> |
| 35 |                                 |     |                                                                                                                                                                                                                                                                                                                                       |                           |
| 36 |                                 |     |                                                                                                                                                                                                                                                                                                                                       |                           |
| 37 | Protocol amendments             | 25  | Plans for communicating important protocol modifications (eg, changes to eligibility criteria, outcomes, analyses) to relevant parties (eg, investigators, REC/IRBs, trial participants, trial registries, journals, regulators)                                                                                                      | <u>15</u>                 |
| 38 |                                 |     |                                                                                                                                                                                                                                                                                                                                       |                           |
| 39 |                                 |     |                                                                                                                                                                                                                                                                                                                                       |                           |
| 40 |                                 |     |                                                                                                                                                                                                                                                                                                                                       |                           |
| 41 |                                 |     |                                                                                                                                                                                                                                                                                                                                       |                           |
| 42 |                                 |     |                                                                                                                                                                                                                                                                                                                                       |                           |

|    |                               |     |                                                                                                                                                                                                                                                                                     |                               |
|----|-------------------------------|-----|-------------------------------------------------------------------------------------------------------------------------------------------------------------------------------------------------------------------------------------------------------------------------------------|-------------------------------|
| 1  | Consent or assent             | 26a | Who will obtain informed consent or assent from potential trial participants or authorised surrogates, and how (see Item 32)                                                                                                                                                        | <u>6</u>                      |
| 2  |                               |     |                                                                                                                                                                                                                                                                                     |                               |
| 3  |                               |     |                                                                                                                                                                                                                                                                                     |                               |
| 4  |                               | 26b | Additional consent provisions for collection and use of participant data and biological specimens in ancillary studies, if applicable                                                                                                                                               | <u>Not Applicable</u>         |
| 5  |                               |     |                                                                                                                                                                                                                                                                                     |                               |
| 6  |                               |     |                                                                                                                                                                                                                                                                                     |                               |
| 7  | Confidentiality               | 27  | How personal information about potential and enrolled participants will be collected, shared, and maintained in order to protect confidentiality before, during, and after the trial                                                                                                | <u>8</u>                      |
| 8  |                               |     |                                                                                                                                                                                                                                                                                     |                               |
| 9  |                               |     |                                                                                                                                                                                                                                                                                     |                               |
| 10 | Declaration of interests      | 28  | Financial and other competing interests for principal investigators for the overall trial and each study site                                                                                                                                                                       | <u>18</u>                     |
| 11 |                               |     |                                                                                                                                                                                                                                                                                     |                               |
| 12 |                               |     |                                                                                                                                                                                                                                                                                     |                               |
| 13 | Access to data                | 29  | Statement of who will have access to the final trial dataset, and disclosure of contractual agreements that limit such access for investigators                                                                                                                                     | <u>18</u>                     |
| 14 |                               |     |                                                                                                                                                                                                                                                                                     |                               |
| 15 |                               |     |                                                                                                                                                                                                                                                                                     |                               |
| 16 | Ancillary and post-trial care | 30  | Provisions, if any, for ancillary and post-trial care, and for compensation to those who suffer harm from trial participation                                                                                                                                                       | <u>in consent form</u>        |
| 17 |                               |     |                                                                                                                                                                                                                                                                                     |                               |
| 18 |                               |     |                                                                                                                                                                                                                                                                                     |                               |
| 19 |                               |     |                                                                                                                                                                                                                                                                                     |                               |
| 20 | Dissemination policy          | 31a | Plans for investigators and sponsor to communicate trial results to participants, healthcare professionals, the public, and other relevant groups (eg, via publication, reporting in results databases, or other data sharing arrangements), including any publication restrictions | <u>2</u>                      |
| 21 |                               |     |                                                                                                                                                                                                                                                                                     |                               |
| 22 |                               |     |                                                                                                                                                                                                                                                                                     |                               |
| 23 |                               |     |                                                                                                                                                                                                                                                                                     |                               |
| 24 |                               | 31b | Authorship eligibility guidelines and any intended use of professional writers                                                                                                                                                                                                      | <u>Not Applicable</u>         |
| 25 |                               |     |                                                                                                                                                                                                                                                                                     |                               |
| 26 |                               | 31c | Plans, if any, for granting public access to the full protocol, participant-level dataset, and statistical code                                                                                                                                                                     | <u>Not Applicable</u>         |
| 27 |                               |     |                                                                                                                                                                                                                                                                                     |                               |
| 28 |                               |     |                                                                                                                                                                                                                                                                                     |                               |
| 29 | <b>Appendices</b>             |     |                                                                                                                                                                                                                                                                                     |                               |
| 30 |                               |     |                                                                                                                                                                                                                                                                                     |                               |
| 31 | Informed consent materials    | 32  | Model consent form and other related documentation given to participants and authorised surrogates                                                                                                                                                                                  | <u>has been proved by IRB</u> |
| 32 |                               |     |                                                                                                                                                                                                                                                                                     |                               |
| 33 |                               |     |                                                                                                                                                                                                                                                                                     |                               |
| 34 | Biological specimens          | 33  | Plans for collection, laboratory evaluation, and storage of biological specimens for genetic or molecular analysis in the current trial and for future use in ancillary studies, if applicable                                                                                      | <u>Not Applicable</u>         |
| 35 |                               |     |                                                                                                                                                                                                                                                                                     |                               |
| 36 |                               |     |                                                                                                                                                                                                                                                                                     |                               |

\*It is strongly recommended that this checklist be read in conjunction with the SPIRIT 2013 Explanation & Elaboration for important clarification on the items. Amendments to the protocol should be tracked and dated. The SPIRIT checklist is copyrighted by the SPIRIT Group under the Creative Commons "[Attribution-NonCommercial-NoDerivs 3.0 Unported](https://creativecommons.org/licenses/by/4.0/)" license.

# BMJ Open

## Ultrasound guided superficial cervical plexus block for analgesia in patients undergoing craniotomy via suboccipital retrosigmoid approach: study protocol of a randomized controlled trial

|                                 |                                                                                                                                                                                                                                                                                                                                                                                                     |
|---------------------------------|-----------------------------------------------------------------------------------------------------------------------------------------------------------------------------------------------------------------------------------------------------------------------------------------------------------------------------------------------------------------------------------------------------|
| Journal:                        | <i>BMJ Open</i>                                                                                                                                                                                                                                                                                                                                                                                     |
| Manuscript ID                   | bmjopen-2019-034003.R2                                                                                                                                                                                                                                                                                                                                                                              |
| Article Type:                   | Protocol                                                                                                                                                                                                                                                                                                                                                                                            |
| Date Submitted by the Author:   | 05-Dec-2019                                                                                                                                                                                                                                                                                                                                                                                         |
| Complete List of Authors:       | Peng, Kun; Beijing Tiantan Hospital, Anesthesiology<br>Zeng, Min; Beijing Tiantan Hospital, Anesthesiology<br>Dong, Jia; Beijing Tiantan Hospital, Anesthesiology<br>Yan, Xiang; Beijing Tiantan Hospital, Anesthesiology<br>Wang, Dexiang; Beijing Tiantan Hospital, anesthesiology<br>Li, Shu; Beijing Tiantan Hospital, Anesthesiology<br>Peng, Yuming; Beijing Tiantan Hospital, Anesthesiology |
| <b>Primary Subject Heading</b>: | Anaesthesia                                                                                                                                                                                                                                                                                                                                                                                         |
| Secondary Subject Heading:      | Anaesthesia                                                                                                                                                                                                                                                                                                                                                                                         |
| Keywords:                       | craniotomy, analgesia, superficial cervical plexus block, Ultrasound < RADIOLOGY & IMAGING                                                                                                                                                                                                                                                                                                          |
|                                 |                                                                                                                                                                                                                                                                                                                                                                                                     |

SCHOLARONE™  
Manuscripts





I, the Submitting Author has the right to grant and does grant on behalf of all authors of the Work (as defined in the below author licence), an exclusive licence and/or a non-exclusive licence for contributions from authors who are: i) UK Crown employees; ii) where BMJ has agreed a CC-BY licence shall apply, and/or iii) in accordance with the terms applicable for US Federal Government officers or employees acting as part of their official duties; on a worldwide, perpetual, irrevocable, royalty-free basis to BMJ Publishing Group Ltd ("BMJ") its licensees and where the relevant Journal is co-owned by BMJ to the co-owners of the Journal, to publish the Work in this journal and any other BMJ products and to exploit all rights, as set out in our [licence](#).

The Submitting Author accepts and understands that any supply made under these terms is made by BMJ to the Submitting Author unless you are acting as an employee on behalf of your employer or a postgraduate student of an affiliated institution which is paying any applicable article publishing charge ("APC") for Open Access articles. Where the Submitting Author wishes to make the Work available on an Open Access basis (and intends to pay the relevant APC), the terms of reuse of such Open Access shall be governed by a Creative Commons licence – details of these licences and which [Creative Commons](#) licence will apply to this Work are set out in our licence referred to above.

Other than as permitted in any relevant BMJ Author's Self Archiving Policies, I confirm this Work has not been accepted for publication elsewhere, is not being considered for publication elsewhere and does not duplicate material already published. I confirm all authors consent to publication of this Work and authorise the granting of this licence.

1  
2  
3  
4 **Ultrasound guided superficial cervical plexus block for analgesia in patients**  
5  
6 **undergoing craniotomy via suboccipital retrosigmoid approach: study protocol of**  
7  
8 **a randomized controlled trial**  
9  
10

11  
12  
13  
14 \*Kun Peng<sup>1</sup>, M.D., \*Min Zeng<sup>2</sup>, M.D., Jia Dong<sup>3</sup>, M.D., Xiang Yan<sup>4</sup>, M.D., Dexiang  
15 Wang<sup>5</sup>, M.D., Shu Li<sup>6</sup>, M.D., Ph.D., Yuming Peng<sup>7</sup>§, M.D., Ph.D.

16  
17 Department of Anesthesiology, Beijing Tiantan Hospital, Capital Medical University,  
18 Beijing, PR China.  
19

20  
21  
22  
23 \*Kun Peng and Min Zeng are co-first authors.  
24

25  
26 §Corresponding authors and requests for reprints:  
27

28 Yuming Peng, M.D., Ph.D.

29  
30 Department of Anesthesiology, Beijing Tiantan Hospital, Capital Medical University,  
31 PR China  
32

33 Mailing address: No.119, Nansihuan Xilu, Fengtai District, Beijing, PR China 100070.

34  
35 Phone: 8610-59976658

36  
37 Email: florapym766@163.com  
38

39  
40 Word count: 3396 words  
41

42  
43  
44 Email address:

45  
46 Kun Peng: 13693215761@163.com

47  
48 Min Zeng: fly800727@163.com

49  
50 Jia Dong: dongjia800@hotmail.com

51  
52 Xiang Yan: yanxiang9991@163.com

53  
54 Dexiang Wang: ttyywdx@163.com

55  
56 Shu Li: emilyneuro@gmail.com

57  
58 Yuming Peng: florapym766@163.com  
59  
60

## Abstract

**Introduction** Scalp nerve block has been proven to be an alternative choice to opioids in multimodal analgesia. However, for the infratentorial space-occupying craniotomy, especially the suboccipital retrosigmoid craniotomy, scalp nerve block is insufficient.

**Methods and analysis** The study is a prospective, single-center, randomized, paralleled-group controlled trial. Patients scheduled to receive elective suboccipital retrosigmoid craniotomy will be randomly assigned to the superficial cervical plexus block group or the control group. After anesthesia induction, superficial cervical plexus nerve block will be performed under the guidance of ultrasound. The primary outcome is the cumulative consumption of sufentanil by the patient controlled intravenous analgesia pump within 24 hours after surgery. Secondary outcomes include the cumulative consumption of sufentanil at other 4 time points and numerical rating scale pain severity score.

**Ethics and dissemination** The protocol (version number: 2.0, April 10, 2019) has been approved by the Ethics Review Committee of China Registered Clinical Trials (Ethics Review No. ChiECRCT-20190047). The findings of this study will be disseminated in peer-reviewed journals and at scientific conferences.

**Trial registration number** NCT04036812.

## *Article Summary*

### *Strengths and limitations of this study*

- This is the randomized controlled trial to observe the efficacy and safety of preoperative ultrasound-guided superficial cervical plexus block on postoperative analgesia in patients undergoing craniotomy via suboccipital retrosigmoid approach.
- The results will optimize postoperative analgesia in patients undergoing infratentorial craniotomy, thereby improving prognosis of the patients.
- This is a single-center clinical trial design which might limit the generalization of the conclusion.

## ***Background***

The procedure of craniotomy was previously assumed to be less painful than other sites of surgeries [1-3]. However, in the prospective study of patients undergoing craniotomy, Gottchalk et al. found that the incidence of postoperative pain was as high as 87%, among of 55% patients experienced moderate to severe pain [4].

Post-craniotomy pain is mainly caused by scalp incision, with abundant free nerve endings. After incision, noxious stimulus signals from the scalp is received by the trigeminal branches or cervical plexus branches, and then transmitted through the trigeminal nucleus and the dorsal horn of the spinal cord to the hypothalamus and cerebral cortex. The whole process is regulated by a variety of inflammatory mediators, peripheral nerve pathways and central nervous system [5].

The pain severity after craniotomy is closely associated with surgical approach. Gottschalk et al. evaluated pain after craniotomy and found that the infratentorial approach was associated with severe postoperative pain and more perioperative analgesic requirements [4]. Rimaaja et al. reported that 32% of patients had no or only mild headache prior to removal of the cerebellopontine angle area mass, while 64% of patients developed severe headache after craniotomy [6]. The high incidence of postoperative pain after craniotomy through infratentorial approach, especially suboccipital retrosigmoid approach may be related to the injury of neck muscles and posterior occipital muscles by the surgical approach, as well as the special position of the head and neck during craniotomy, leading to postoperative muscle spasm [7, 8].

1  
2  
3  
4 Therefore, it is necessary to explore an ideal analgesic modality that can effectively  
5  
6 provide surgical analgesia with minimal or no systemic changes for this population.  
7

8  
9 The skin incision is the main source of pain during craniotomy. Scalp nerve block (SNB)  
10  
11 has been proven to be an excellent alternative analgesic choice in supratentorial  
12  
13 surgeries [9-11]. However, for the suboccipital retrosigmoid craniotomy, the scalp  
14  
15 innervation area is insufficient to cover the incision, resulting defective nerve blockage.  
16  
17 Therefore, it is necessary to explore an analgesic modality to provide a more ideal  
18  
19 analgesic regimen for patients undergoing suboccipital retrosigmoid craniotomy.  
20  
21  
22  
23

24  
25 The cervical plexus is from the anterior branch of C1-C4 cervical nerve, divided into  
26  
27 superficial plexus and deep plexus. The cutaneous branches of the superficial cervical  
28  
29 plexus include the lesser occipital nerve, the greater auricular nerve, transverse cervical  
30  
31 nerve and supraclavicular nerve, innervating the incision area of the suboccipital  
32  
33 sigmoid sinus approach craniotomy [12]. Therefore, the superficial cervical plexus  
34  
35 block (SCPB) is a potential candidate to satisfy the analgesic requirement of  
36  
37 retrosigmoid craniotomy. Francois et al. observed the effect of transitional analgesia  
38  
39 from SCPB after elective infratentorial or occipital craniotomy in 30 patients [13]. In  
40  
41 the control group, 0.1mg/kg morphine was administrated after close of the dura. It was  
42  
43 found that the effect of SCPB on postoperative analgesia was not inferior to  
44  
45 administration of morphine after dura closure. However, the sample size estimation  
46  
47 they made is too small. Second, SCPB wasn't guided by ultrasound. The analgesic  
48  
49 effect of SCPB may not be fully guaranteed. In addition, no related adverse effects were  
50  
51  
52  
53  
54  
55  
56  
57  
58  
59  
60

1  
2  
3  
4 reported in that study. However, the study provided us a feasible method of SCPB  
5  
6 analgesia for suboccipital retrosigmoid craniotomy.  
7  
8

9 With the continual development of visualization techniques, ultrasound-guided nerve  
10  
11 blocks have become increasingly popular [14-16]. Ultrasound-guided SCPB, the  
12  
13 operator can directly see adjacent anatomical structure, inject the local anesthetic into  
14  
15 the correct anatomical level, avoid accidental injury during the puncture, and avoid the  
16  
17 unexpected deep cervical plexus block. Ultrasound-guided SCPB has the advantages of  
18  
19 faster onset of action, less dosage, high success rate, and fewer complications [17, 18].  
20  
21 Therefore, we propose the hypothesis that preoperative ultrasound-guided SCPB could  
22  
23 safely and effectively provide analgesia for patients undergoing craniotomy via  
24  
25 suboccipital retrosigmoid approach. The objective is to compare the cumulative  
26  
27 consumption of postoperative opioids between groups.  
28  
29  
30  
31  
32  
33  
34

## 35 ***Methods***

### 36 ***Study design***

37  
38 This is a prospective, single-center, randomized, paralleled-group controlled trial  
39  
40 ( Figure 1. ) being conducted at Beijing Tiantan Hospital, Capital Medical  
41  
42 University, China. The study was approved by the Ethics Review Committee of China  
43  
44 Registered Clinical Trials on April 8, 2019 (No. ChiECRCT-20190047). The study was  
45  
46 registered within [clinicaltrials.gov](http://clinicaltrials.gov) on June 29 with the registration number  
47  
48 NCT04036812. Preoperative interviews will be conducted by specially trained research  
49  
50 assistants to inform patients of the study objectives, risks and benefits, and to obtain  
51  
52 written informed consent from patients or legal representatives. The schedule of  
53  
54  
55  
56  
57  
58  
59  
60

1  
2  
3  
4 enrollment and assessments is shown in the Standard Protocol Items:  
5  
6 Recommendations for Interventional Trials (SPIRIT) ( Figure 2.).  
7  
8

9  
10 ***Study population***

11  
12 **Inclusion criteria**

13  
14 Patients scheduled to undergo elective suboccipital retrosigmoid craniotomy will  
15  
16 be recruited for screening eligibility one day before surgery. Inclusion criteria  
17  
18 include age between 18 and 65 years, and American Society of Anesthesiologists (ASA)  
19  
20 physical status I-III.  
21  
22

23  
24  
25 **Exclusion criteria**

26  
27 Exclusion criteria include refuse to provide written informed consent, local infection,  
28  
29 preoperative impairment of consciousness and cognitive function, uncontrolled  
30  
31 hypertension, inability to communicate; allergic to experimental drugs; history of drug  
32  
33 abuse; history of chronic headache; aphasia and hearing impairment; second  
34  
35 craniotomy; body mass index  $< 18.5 \text{ kg/m}^2$  or  $> 35.0 \text{ kg/m}^2$  .  
36  
37  
38  
39

40  
41 ***Randomization and blinding***

42  
43 Randomization will be conducted via a computer-generated table by an independent  
44  
45 research assistant who will be pack the allocation sequence with identical shape and  
46  
47 size opaque envelopes and distribute to the researcher. The researcher will open the  
48  
49 envelopes and perform a SCPB or only puncture based on the grouping. Patients will  
50  
51 be randomly assigned to two groups with a 1: 1 ratio. The researcher assistant, patients,  
52  
53 the anesthesiologist responsible for intraoperative management and outcome assessors  
54  
55  
56  
57  
58  
59  
60



1  
2  
3  
4 will all be blinded to the allocation until the completion of the study analysis unless  
5  
6 specific circumstances, such as the occurrence of a serious adverse event (SAE).  
7  
8

### 9 ***Data collection***

10  
11 After obtaining informed consent, an independent research assistant will initiate  
12  
13 baseline information collection one day before surgery. Basic demographic information,  
14  
15 including gender, age, vital signs, height, weight, past medical history/family history,  
16  
17 medication history, supplementary examination, assessment (ASA classification,  
18  
19 headache and severity, treatment, dizziness, tinnitus, facial paralysis, nausea, vomiting  
20  
21 and other symptoms) will be collected. All personal information will be kept strictly  
22  
23 confidential for research purposes only. The assessment of primary and other secondary  
24  
25 outcomes will be performed by trained research assessors who are blinded to the group  
26  
27 allocation.  
28  
29  
30  
31  
32  
33  
34

### 35 ***Intervention***

36  
37 Patients will be randomly assigned to the SCBP group or the control group. Peripheral  
38  
39 venous access will be established upon arrival in operating room. After anaesthesia  
40  
41 induction, SCPB will be performed under the guidance of ultrasound (HITACHI  
42  
43 Company, Noblus) by the independent researcher who will not involve in intraoperative  
44  
45 management or postoperative follow-up. Patients will be at supine position with  
46  
47 ipsilateral shoulder relaxed and slightly elevated while head tilting to the opposite side.  
48  
49 After marking the midpoint of the posterior border of clavicular head of the  
50  
51 sternocleidomastoid muscle (about cricoid cartilage level, about 3-4 cm above the  
52  
53 clavicle), an ultrasound probe (50 mm high frequency linear array) warped with sterilize  
54  
55  
56  
57  
58  
59  
60

1  
2  
3  
4 plastic dress will be placed in the transverse position at the previous measuring mark.

5  
6 The scanning depth will be 3-4 cm and the focusing position will be 2-3 cm. After  
7  
8 confirming the sternocleidomastoid muscle, we move the probe backwards until the  
9  
10 posterior border of the sternocleidomastoid muscle in the center of the screen, and  
11  
12 identify the investing fascia and prevertebral fascia from the shallow to the deep layer.  
13  
14

15  
16 Using long-axis in-plane technique, a 50 mm long, 20 G short bevel needle will be  
17  
18 inserted from the lateral border of sternocleidomastoid muscle. Under guidance of  
19  
20 ultrasound, we will confirm the needle tip locating between the deep layer of investing  
21  
22 fascia and the superficial layer of prevertebral fascia, close to the border of  
23  
24 sternocleidomastoid muscle. After negative aspiration of blood and cerebrospinal fluid,  
25  
26 1 ml of 0.5% ropivacaine will be administered to confirm the location of the needle tip.  
27  
28 Then, 10mL of 0.5% ropivacaine will be infused on the superficial layer of prevertebral  
29  
30 fascia. The puncture site will be covered with opaque infusion dressing after completing  
31  
32 of SCBP.  
33  
34  
35  
36  
37  
38  
39

40  
41 In the control group, the puncture will also be performed by ultrasound guidance,  
42  
43 covered with opaque infusion dressing but performed without infusion.  
44

#### 45 46 ***Concomitant treatment***

47  
48 Routine monitoring will include electrocardiograph (ECG), pulse oxygen saturation,  
49  
50 noninvasive blood pressure (NIBP), body temperature, minimal alveolar concentration  
51  
52 (MAC) of inhalation agent and bispectral index (BIS). Continuous arterial pressure,  
53  
54 urine output and end-tidal carbon dioxide partial pressure (ETCO<sub>2</sub>) will be monitored  
55  
56 after anesthesia induction. All patients will be premedicated with midazolam (0.05  
57  
58  
59  
60

1  
2  
3  
4 mg/kg) intravenously 5 minutes before anesthesia induction. Anesthesia will be  
5  
6 induced with propofol (1.5 to 2.5 mg/kg), sufentanil (0.3 to 0.4 µg/kg), and rocuronium  
7  
8 (0.9 mg/kg) or cisatracurium (0.2 mg/kg). After tracheal intubation, mechanical  
9  
10 ventilation will be performed, at a tidal volume 6-8 ml/kg, a respiratory rate of 12-  
11  
12 15/min, an I:E of 1:2, a 50% fraction of inspired oxygen in the air and fresh gas at a  
13  
14 flow rate of 2 L/min to maintain the ETCO<sub>2</sub> between 35 and 40 mmHg.  
15  
16  
17

18  
19 Anesthesia will be maintained with combined intravenous anesthesia and inhalational  
20  
21 anesthesia. Along with the inhalational anesthesia maintained with 0.5 MAC, infusion  
22  
23 of remifentanyl (0.1-0.4 µg/kg/min) and propofol (3-8 mg/kg/h) will be maintained to  
24  
25 keep BIS values between 40 and 50. No muscle relaxant will be used during the  
26  
27 procedure to meet intraoperative electrophysiological neuro-monitoring  
28  
29 requirements. No additional local anesthetics or analgesics will be administered  
30  
31 intraoperatively. Propofol and remifentanyl infusion will be discontinued at the end of  
32  
33 surgery.  
34  
35  
36  
37  
38  
39

40  
41 The patients will be extubated after full recovery from anesthesia and transferred to the  
42  
43 post-anesthesia care unit (PACU). The patients will remain in the PACU for 120  
44  
45 minutes and receive nasal oxygen inhalation with ECG, NIBP, pulse oximetry  
46  
47 monitoring. Sufentanyl-loaded electric analgesia pumps (Rhythmic Plus, Micrel  
48  
49 Medical Devices S.A., Greece-European Union) which pre-programmed by the  
50  
51 research assistant will be connected to the patients for routine postoperative analgesia.  
52  
53  
54 The patient controlled intravenous analgesia (PCIA) pumps will be filled with  
55  
56 sufentanyl (100 µg) and ondansetron (16 mg) diluted in 100 mL of 0.9% saline. This  
57  
58  
59  
60

1  
2  
3  
4 regimen will provide a bolus of 1 µg sufentanyl on demand with a 10-minute lockout  
5  
6 time, without continuous background infusion dose or loading dose. Insufficient  
7  
8 postoperative analgesia will be defined as an NRS score >4 lasting over 15 minutes  
9  
10 or >6. Once inadequate postoperative analgesia was confirmed, patients will receive  
11  
12 rescue analgesic. If the patient vomit or report nausea for more than 15 minutes, rescue  
13  
14 antiemetic will be administered. The type, the frequency and the dose of rescue  
15  
16 analgesic and antiemetic will be recorded. The reason for administration will also be  
17  
18 recorded giving drugs with analgesic or/and antiemetic.  
19  
20  
21  
22  
23

24  
25 Physiologic parameters, the total doses of anesthetic drugs and vasoactive drugs will be  
26  
27 recorded. Fluid input and output will also be closely monitored and recorded.  
28  
29

30 Anesthesia and surgery duration will be summarized.  
31

### 32 ***Outcomes and safety measures***

33  
34 The aim of this study is to observe the effect of SCPB on postoperative analgesia in  
35  
36 patients with suboccipital retrosigmoid craniotomy. During preoperative visits, patients  
37  
38 will be informed of the score how to assess the pain, analgesic satisfaction, sleep quality  
39  
40 and anesthesia recovery quality.  
41  
42  
43  
44

### 45 ***Primary outcome***

46  
47 The primary outcome is the cumulative consumption of sufentanil by the PCIA within  
48  
49 24 hours after surgery. The primary outcomes will be assessed by trained research  
50  
51 assistants at 24 hours after surgery through reading the PCIA data.  
52  
53  
54

### 55 ***Secondary outcomes***

56  
57 The secondary outcomes include the other efficacy parameters and safety outcomes.  
58  
59  
60

1  
2  
3  
4 1) The first-time point that the patients use PCIA, the total and effective requests of  
5  
6 PCIA at 5 different time points after surgery (1, 2, 4, 24, 48 hours) and the cumulative  
7  
8 consumption of sufentanil at 4 different time points (1, 2, 4, 48 hours) after surgery.  
9

10  
11 2) Pain severity score. Pain will be assessed at 5 time-points after surgery. The degree  
12  
13 of surgical incision pain will be assessed at rest and on movement NRS pain score.  
14  
15 Insufficient postoperative analgesia is defined as an NRS score that exceeds 4 lasted  
16  
17 for 15 minutes or exceeds 6. Information of analgesic drugs administrated in case of  
18  
19 insufficient postoperative analgesia was also recorded. Pain severity score in NRS is 0  
20  
21 to 10, 0 representing no pain and 10 representing worst pain imaginable.  
22  
23  
24  
25

26  
27 3) Anesthesia recovery quality score. Anesthesia Steward Emergence Scale [19] will be  
28  
29 used at 1 and 2 hours after surgery to evaluate the recovery quality of anesthesia.  
30  
31 Anesthesia recovery quality score will be assessed by the Anesthesia Steward  
32  
33 Emergence Scale which is divided into three parts: the degree of wakefulness (2 points  
34  
35 for complete recovery, 1 point for response to stimulation, 0 point for no response to  
36  
37 stimulation), the degree of airway patency (2 points for cough according to the doctor's  
38  
39 order, 1 point for maintenance of airway patency without support, 0 point for support  
40  
41 required for respiratory tract) and the degree of limb mobility (2 points for conscious  
42  
43 activities of limbs, 1 point for unconscious activities of limbs, 0 point for no activities  
44  
45 of limbs).  
46  
47  
48  
49  
50  
51  
52

53  
54 4) Analgesic satisfaction and sleep quality. Patient satisfaction with overall pain  
55  
56 management and sleep quality will be evaluated separately at 24 and 48 hours after  
57  
58 surgery using NRS. Analgesic satisfaction score in NRS is 0 to 10, 0 representing  
59  
60

1  
2  
3  
4 extremely dissatisfied and 10 representing extremely satisfied. Sleep quality score in  
5  
6 NRS is scored as 0 to 10, 0 representing unable to sleep and 10 representing deep sleep.

7  
8  
9 5) Adverse events. Ramsay score [20] and Nausea and vomiting scores as well other  
10  
11 adverse events (dizziness, fatigue, hematoma, local anesthetic poisoning and  
12  
13 hoarseness) will be evaluated at the 5 time points after surgery.  
14  
15

### 16 17 ***Sample size calculation***

18  
19 We estimate the sample size according to the primary outcome of postoperative-24-  
20  
21 hour PCIA sufentanil consumption by using PASS 2011 software (NCSS LLC). Based  
22  
23 on the previous literature [21], Akcil et al. demonstrated the mean [95% confidence  
24  
25 interval (CI)] postoperative cumulative morphine consumption was 30 mg (25 to 35) in  
26  
27 the scalp block group and 50 mg (40 to 60) in the control group. Considering that 1 mg  
28  
29 morphine is equivalent to 1 µg sufentanil, we estimated the scalp block in their study  
30  
31 reduced PCIA sufentanil consumption by 20 µg within postoperative 24 hours. In the  
32  
33 routine practice without SCBP, we also apply PCIA for the patients undergoing  
34  
35 craniotomy via suboccipital retrosigmoid approach with the dosage of sufentanil as 50  
36  
37 µg during the first 24 hours after surgery. So, we estimated the effect size of mean as  
38  
39 20 µg with the standard deviation of 30 µg for the SCBP group comparing with the  
40  
41 control group. The sample size of 106 patients will be sufficient to detect the difference  
42  
43 at a two-tailed significant level of 0.05 and a power of 90% using Student t test, with a  
44  
45 drop-out rate of 10%.  
46  
47  
48  
49  
50  
51  
52  
53  
54  
55

### 56 57 ***Statistical analysis***

58  
59  
60

1  
2  
3  
4 Analysis will be done using SPSS software (version 23.0). We will apply the intention-  
5  
6 to-treat and per-protocol analysis on the primary outcome. If necessary, consider the  
7  
8 number of missing outcomes as poor prognosis and conduct sensitivity analysis. The  
9  
10 continuous variables will be summarized with mean (standard deviation) or median  
11  
12 (interquartile range, IQR), depending on normality determined with Shapiro-Wilk test.  
13  
14 Normally distributed and continuous variables will be compared with Student's t-test,  
15  
16 while skewed variables will be compared using the Mann-Whitney U test. The  
17  
18 categorical variables will be described as counts ( percentages ) and compared with  
19  
20 chi-square analysis or Fisher's exact test. The repeated measurement data will be  
21  
22 analyzed by repeated measurements of variance analysis. Bonferroni correction will be  
23  
24 used for multiple comparisons. A significance level of  $P < 0.05$  was used to indicate  
25  
26 statistical significance.  
27  
28  
29  
30  
31  
32  
33

### 34 ***Reporting of adverse events***

35  
36 All adverse events will be closely monitored until a stable situation has been reached.  
37  
38 The chief investigator will be informed of any serious adverse events and determine the  
39  
40 severity and causality of these events. All adverse events associated with this study will  
41  
42 be recorded and reported to the ethics committee as part of the annual report. The chief  
43  
44 investigator will be responsible for a getting the details about causes of AEs, treatment  
45  
46 measures, prognosis, and reporting serious adverse events to the Ethics Committee  
47  
48 immediately.  
49  
50  
51  
52  
53  
54  
55

### 56 ***Protocol Amendment***

1  
2  
3  
4 The chief investigator will be responsible for any decision to amend the protocol. If  
5  
6 there is any modification (eg, changes to eligibility criteria, outcomes, analyses) the  
7  
8 principle investigator will communicate and gain approval from the China Ethics  
9  
10 Committee of Registering Clinical Trials prior to implementation, and communicate  
11  
12 with relevant other parties (eg, investigators, trial participants, trial registries, journals,  
13  
14 regulators)  
15  
16  
17  
18  
19

### 20 ***Discussion***

21  
22 An ideal analgesic should be able to provide analgesia for entire surgical period and  
23  
24 with minimal or no systemic changes. Meanwhile, the interference on consciousness  
25  
26 and postoperative neurological function should be minimized during the recovery and  
27  
28 evaluation period. At present, PCIA with opioid is the most common analgesia modality  
29  
30 for patients received craniotomy [21, 22]. However, undesirable effects of opioids,  
31  
32 including respiratory depression, nausea, vomiting, urinary retention, etc., not only  
33  
34 bring discomfort to patients, but also affect neurological function evaluation by  
35  
36 neurosurgeons [23]. Besides opioids, nonsteroidal anti-inflammatory drugs (NSAIDs),  
37  
38 another common analgesia agent is not suitable for postoperative analgesia after  
39  
40 neurosurgery due to its effect on coagulation [24]. Gabapentin is an adjuvant  
41  
42 antiepileptic agent with some analgesic effects. Our previous research demonstrated  
43  
44 that oral gabapentin relieved early postoperative pain, with increased depth of sedation  
45  
46 in post-craniotomy, which indicated gabapentin was not the appropriate candidate for  
47  
48 postoperative neurosurgical analgesia[25]. Therefore, it is necessary to explore an ideal  
49  
50  
51  
52  
53  
54  
55  
56  
57  
58  
59  
60



1  
2  
3  
4 analgesic modality that can effectively provide surgical analgesia with minimal or no  
5  
6 systemic changes for this population.  
7

8  
9 This is a prospective, single-center, randomized, parallel-group controlled trial to assess  
10  
11 the efficacy and safety of preoperative ultrasound-guided SCBP for analgesia in  
12  
13 patients undergoing suboccipital retrosigmoid craniotomy. With the continuous  
14  
15 development of ultrasound guidance technology, utilization of visualized nerve block  
16  
17 became more popular in clinical practice [15, 16, 18]. We design the current study to  
18  
19 use ultrasound-guided SCBP to explore the efficacy and safety of postoperative  
20  
21 analgesia in patients undergoing suboccipital sigmoid approach for craniotomy.  
22  
23 Although ultrasound guidance greatly improves the efficacy and safety of the block, we  
24  
25 still can't ignore the risk associated with the cervical plexus block. Therefore, in this  
26  
27 study we will observe these complications such as hematoma, dizziness, fatigue,  
28  
29 hematoma, local anesthetic poisoning and hoarseness. At the same time, in order to  
30  
31 ensure the accuracy and consistency of ultrasound-guided puncture, the  
32  
33 anesthesiologists who will receive specific training before the first patients are enrolled,  
34  
35 the corresponding ultrasound image data of puncture will be preserved, so as to ensure  
36  
37 the uniformity of block effect in each patient.  
38  
39

40  
41 Although SCPB may reduce postcraniotomy pain, it is not routinely used in our current  
42  
43 clinical practice. To maintain the analgesic effect on the patients in the control group,  
44  
45 the patients will be given the same analgesic dosage regimen following the clinical  
46  
47 routine of our medical center, which fully ensure that the patients are safe and painless  
48  
49  
50  
51  
52  
53  
54  
55  
56  
57  
58  
59  
60

1  
2  
3  
4 during surgery. Postoperative PCIA analgesia will be routinely given to all patients,  
5  
6 and rescue analgesics will be promptly administered when analgesia is insufficient.  
7

8  
9 Our study will improve the ideal analgesic regimen for patients undergoing suboccipital  
10  
11 retrosigmoid craniotomy, so as to reduce perioperative stress response and  
12  
13 complications, improve patient satisfaction and early recovery.  
14  
15

16  
17 ***Patient and public involvement:*** Patients and the public were not directly  
18  
19 consulted in the development of the research question or outcome measures.  
20  
21 Patients were not involved in the design, the recruitment and conduct of the  
22  
23 study. At the completion of this trial, a manuscript will be prepared to present  
24  
25 the trial results. Results of the final study will be disseminated to all study  
26  
27 participants through their preferred method of communication indicated at the  
28  
29 time of enrollment. The burden of intervention will not be taken by participants  
30  
31 themselves.  
32  
33  
34  
35  
36  
37

38  
39 ***Acknowledgements:*** The authors would like to express their sincere gratitude to the  
40  
41 colleagues of the Department of Anesthesiology and the Department of Neurosurgery,  
42  
43 Beijing Tiantan Hospital, for their support and cooperation. The authors also would like  
44  
45 to express their sincere gratitude to patient advisers for their cooperation in completing  
46  
47 the trial.  
48  
49

50  
51 ***Author Contributions:*** KP, MZ, JD, DXW, XY, SL, YMP: conceived the study,  
52  
53 contributed to the study design and analytical plans. MZ: drafted the protocol. All  
54  
55 authors read and approved the final protocol.  
56  
57  
58  
59  
60

1  
2  
3  
4 **Funding:** This work was supported by Beijing Municipal Administration of Hospitals  
5  
6 Clinical Medical Development of Special Funding Support (grant number:  
7  
8 ZYLX201708) and Ascent Plan (grant number: DFL20180502), Capital Development  
9  
10 Research Fund Project (grant number: 2018-2-2044).  
11  
12

13  
14 **Competing interests:** None declared.  
15  
16

17 **Ethics approval:** This study is approved by the Ethics Review Committee of China  
18  
19 Registered Clinical Trials (Ethics Review No. ChiECRCT-20190047).  
20  
21

22 **Data sharing statement** The manuscript is a protocol for a randomized controlled trial,  
23  
24 which does not include data.  
25  
26  
27  
28  
29  
30  
31  
32  
33  
34  
35  
36  
37  
38  
39  
40  
41  
42  
43  
44  
45  
46  
47  
48  
49  
50  
51  
52  
53  
54  
55  
56  
57  
58  
59  
60

## References

1. Dunbar PJ, Visco E, Lam AM: **Craniotomy procedures are associated with less analgesic requirements than other surgical procedures.** *Anesthesia and analgesia* 1999, **88**(2):335-340.
2. Maxwell LG, Buckley GM, Kudchadkar SR, Ely E, Stebbins EL, Dube C, Morad A, Jastaniah EA, Sethna NF, Yaster M: **Pain management following major intracranial surgery in pediatric patients: a prospective cohort study in three academic children's hospitals.** *Paediatric anaesthesia* 2014, **24**(11):1132-1140.
3. Molnar L, Simon E, Nemes R, Fulesdi B, Molnar C: **Postcraniotomy headache.** *J Anesth* 2014, **28**(1):102-111.
4. Gottschalk A, Berkow LC, Stevens RD, Mirski M, Thompson RE, White ED, Weingart JD, Long DM, Yaster M: **Prospective evaluation of pain and analgesic use following major elective intracranial surgery.** *Journal of neurosurgery* 2007, **106**(2):210-216.
5. Vadivelu N, Kai AM, Tran D, Kodumudi G, Legler A, Ayrian E: **Options for perioperative pain management in neurosurgery.** *Journal of pain research* 2016, **9**:37-47.
6. Rimaaja T, Haanpaa M, Blomstedt G, Farkkila M: **Headaches after acoustic neuroma surgery.** *Cephalalgia* 2007, **27**(10):1128-1135.
7. **Acute and chronic pain following craniotomy review.** *Anaesthesia* 2005.
8. Chowdhury T, Garg R, Sheshadri V, Venkatraghavan L, Bergese SD, Cappellani RB, Schaller B: **Perioperative Factors Contributing the Post-Craniotomy Pain: A Synthesis of Concepts.** *Front Med (Lausanne)* 2017, **4**:23.
9. Potters JW, Klimek M: **Local anesthetics for brain tumor resection: current perspectives.** *Local and regional anesthesia* 2018, **11**:1-8.
10. Chaki T, Sugino S, Janicki PK, Ishioka Y, Hatakeyama Y, Hayase T, Kaneuchi-Yamashita M, Kohri N, Yamakage M: **Efficacy and Safety of a Lidocaine and Ropivacaine Mixture for Scalp Nerve Block and Local Infiltration Anesthesia in Patients Undergoing Awake Craniotomy.** *Journal of neurosurgical anesthesiology* 2016, **28**(1):1-5.

11. Hwang JY, Bang JS, Oh CW, Joo JD, Park SJ, Do SH, Yoo YJ, Ryu JH: **Effect of scalp blocks with levobupivacaine on recovery profiles after craniotomy for aneurysm clipping: a randomized, double-blind, and controlled study.** *World neurosurgery* 2015, **83**(1):108-113.
12. Osborn I, Sebeo J: **"Scalp block" during craniotomy: a classic technique revisited.** *Journal of neurosurgical anesthesiology* 2010, **22**(3):187-194.
13. Girard F, Quentin C, Charbonneau S, Ayoub C, Boudreault D, Chouinard P, Ruel M, Moumdjian R: **Superficial cervical plexus block for transitional analgesia in infratentorial and occipital craniotomy: a randomized trial.** *Can J Anaesth* 2010, **57**(12):1065-1070.
14. Re M, Blanco J, Gomez de Segura IA: **Ultrasound-Guided Nerve Block Anesthesia.** *Vet Clin North Am Food Anim Pract* 2016, **32**(1):133-147.
15. Barrington MJ, Uda Y: **Did ultrasound fulfill the promise of safety in regional anesthesia?** *Current opinion in anaesthesiology* 2018, **31**(5):649-655.
16. Hoydonckx Y, Peng P: **Echo-guided invasive pain therapy: indications and limitations.** *Current opinion in anaesthesiology* 2018, **31**(6):739-748.
17. Ho B, De Paoli M: **Use of Ultrasound-Guided Superficial Cervical Plexus Block for Pain Management in the Emergency Department.** *J Emerg Med* 2018, **55**(1):87-95.
18. Senapathi TGA, Widnyana IMG, Aribawa I, Wiryana M, Sinardja IK, Nada IKW, Jaya A, Putra I: **Ultrasound-guided bilateral superficial cervical plexus block is more effective than landmark technique for reducing pain from thyroidectomy.** *J Pain Res* 2017, **10**:1619-1622.
19. Steward DJ: **A simplified scoring system for the post-operative recovery room.** *Can Anaesth Soc J* 1975, **22**(1):111-113.
20. Porzio G, Aielli F, Verna L, Micolucci G, Aloisi P, Ficorella C: **Efficacy and safety of deep, continuous palliative sedation at home: a retrospective, single-institution study.** *Support Care Cancer* 2010, **18**(1):77-81.
21. Akcil EF, Dilmen OK, Vehid H, Ibisoglu LS, Tunali Y: **Which one is more effective for analgesia in infratentorial craniotomy? The scalp block or local anesthetic infiltration.** *Clin Neurol Neurosurg* 2017, **154**:98-103.

- 1  
2  
3  
4  
5  
6  
7  
8  
9  
10  
11  
12  
13  
14  
15  
16  
17  
18  
19  
20  
21  
22  
23  
24  
25  
26  
27  
28  
29  
30  
31  
32  
33  
34  
35  
36  
37  
38  
39  
40  
41  
42  
43  
44  
45  
46  
47  
48  
49  
50  
51  
52  
53  
54  
55  
56  
57  
58  
59  
60
22. Song J, Li L, Yu P, Gao T, Liu K: **Preemptive scalp infiltration with 0.5% ropivacaine and 1% lidocaine reduces postoperative pain after craniotomy.** *Acta Neurochir (Wien)* 2015, **157**(6):993-998.
23. Dunn LK, Naik BI, Nemergut EC, Durieux ME: **Post-Craniotomy Pain Management: Beyond Opioids.** *Curr Neurol Neurosci Rep* 2016, **16**(10):93.
24. Jian M, Li X, Wang A, Zhang L, Han R, Gelb AW: **Flurbiprofen and hypertension but not hydroxyethyl starch are associated with post-craniotomy intracranial haematoma requiring surgery.** *British journal of anaesthesia* 2014, **113**(5):832-839.
25. Zeng M, Dong J, Lin N, Zhang W, Zhang K, Peng K, Wang D, Zhao Y, Peng Y, Han R: **Preoperative Gabapentin Administration Improves Acute Postoperative Analgesia in Patients Undergoing Craniotomy: A Randomized Controlled Trial.** *Journal of neurosurgical anesthesiology* 2019, **31**(4):392-398.

1  
2  
3  
4 **Figure legends**  
5  
6  
7

8 **Figure 1.** Consolidated Standards of Reporting Trials (CONSORT) flow diagram  
9

10  
11 **Figure 2.** Standard Protocol Items: Recommendations for Interventional Trials  
12

13  
14  
15 (SPIRIT)  
16  
17  
18  
19  
20  
21  
22  
23  
24  
25  
26  
27  
28  
29  
30  
31  
32  
33  
34  
35  
36  
37  
38  
39  
40  
41  
42  
43  
44  
45  
46  
47  
48  
49  
50  
51  
52  
53  
54  
55  
56  
57  
58  
59  
60

For peer review only

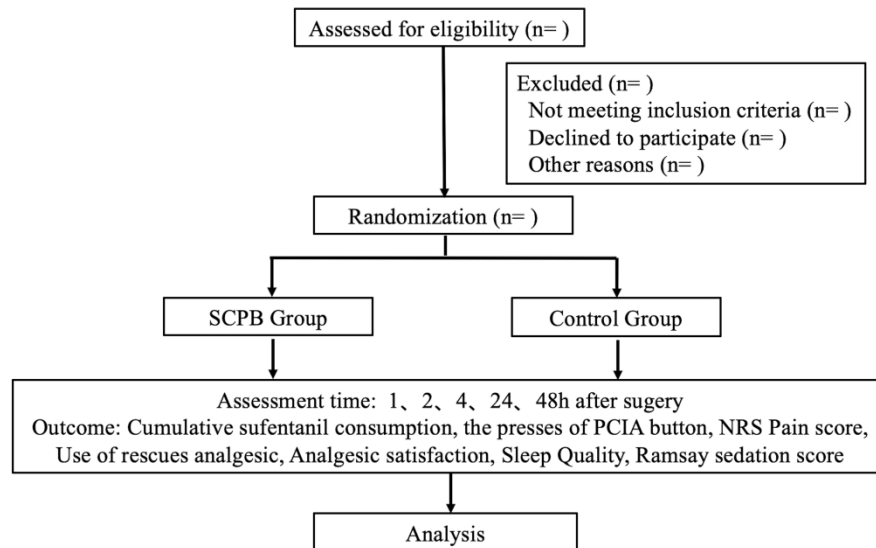

Consolidated Standards of Reporting Trials (CONSORT) flow diagram



| STUDY PERIOD                             |           |             |                       |   |   |    |    |
|------------------------------------------|-----------|-------------|-----------------------|---|---|----|----|
| TIMEPOINT                                | Enrolment | Allocation  | Post-allocation       |   |   |    |    |
|                                          | -1day     | Surgery day | Post-craniotomy(hour) |   |   |    |    |
|                                          |           |             | 1                     | 2 | 4 | 24 | 48 |
| <b>ENROLMENT</b>                         |           |             |                       |   |   |    |    |
| Eligibility screen                       | X         |             |                       |   |   |    |    |
| Informed consent                         | X         |             |                       |   |   |    |    |
| Allocation                               |           | X           |                       |   |   |    |    |
| <b>INTERVENTIONS</b>                     |           |             |                       |   |   |    |    |
| SCP group                                |           | X           |                       |   |   |    |    |
| Control group                            |           | X           |                       |   |   |    |    |
| <b>ASSESSMENTS</b>                       |           |             |                       |   |   |    |    |
| Baseline variables                       |           | X           | X                     | X | X | X  | X  |
| Intraoperative data                      |           | X           |                       |   |   |    |    |
| Anesthesia recovery quality score        |           |             | X                     | X |   |    |    |
| Ramsay Score                             |           |             | X                     | X | X | X  | X  |
| Cumulative sufentanil consumption of PCA |           |             | X                     | X | X | X  | X  |
| Requests of PCA                          |           |             | X                     | X | X | X  | X  |
| Dose and frequency of rescue analgesic   |           |             | X                     | X | X | X  | X  |
| Pain intensity (NRS)                     |           |             | X                     | X | X | X  | X  |
| Analgesia Satisfaction                   |           |             |                       |   |   | X  | X  |
| Sleep quality                            |           |             |                       |   |   | X  | X  |
| Adverse Event                            |           |             | X                     | X | X | X  | X  |

## Standard Protocol Items- Recommendations for Interventional Trials



SPIRIT 2013 Checklist: Recommended items to address in a clinical trial protocol and related documents\*

**Checklist for Ultrasound guided superficial cervical plexus block for analgesia in patients undergoing craniotomy via suboccipital retrosigmoid approach: protocol of a randomized controlled trial**

| Section/item                      | Item No | Description                                                                                                                                                                                                                                                                              | Addressed on page number |
|-----------------------------------|---------|------------------------------------------------------------------------------------------------------------------------------------------------------------------------------------------------------------------------------------------------------------------------------------------|--------------------------|
| <b>Administrative information</b> |         |                                                                                                                                                                                                                                                                                          |                          |
| Title                             | 1       | Descriptive title identifying the study design, population, interventions, and, if applicable, trial acronym                                                                                                                                                                             | <u>1</u>                 |
| Trial registration                | 2a      | Trial identifier and registry name. If not yet registered, name of intended registry                                                                                                                                                                                                     | <u>2</u>                 |
|                                   | 2b      | All items from the World Health Organization Trial Registration Data Set                                                                                                                                                                                                                 | <u>2</u>                 |
| Protocol version                  | 3       | Date and version identifier                                                                                                                                                                                                                                                              | <u>2</u>                 |
| Funding                           | 4       | Sources and types of financial, material, and other support                                                                                                                                                                                                                              | <u>17&amp;18</u>         |
| Roles and responsibilities        | 5a      | Names, affiliations, and roles of protocol contributors                                                                                                                                                                                                                                  | <u>1 &amp; 17</u>        |
|                                   | 5b      | Name and contact information for the trial sponsor                                                                                                                                                                                                                                       | <u>1</u>                 |
|                                   | 5c      | Role of study sponsor and funders, if any, in study design; collection, management, analysis, and interpretation of data; writing of the report; and the decision to submit the report for publication, including whether they will have ultimate authority over any of these activities | <u>17&amp;18</u>         |
|                                   | 5d      | Composition, roles, and responsibilities of the coordinating centre, steering committee, endpoint adjudication committee, data management team, and other individuals or groups overseeing the trial, if applicable (see Item 21a for data monitoring committee)                         | <u>Not Applicable</u>    |

|    |                                                           |     |                                                                                                                                                                                                                                                                                                                                                                                |                                                                                                                                                                                                |            |
|----|-----------------------------------------------------------|-----|--------------------------------------------------------------------------------------------------------------------------------------------------------------------------------------------------------------------------------------------------------------------------------------------------------------------------------------------------------------------------------|------------------------------------------------------------------------------------------------------------------------------------------------------------------------------------------------|------------|
| 1  | <b>Introduction</b>                                       |     |                                                                                                                                                                                                                                                                                                                                                                                |                                                                                                                                                                                                |            |
| 2  |                                                           |     |                                                                                                                                                                                                                                                                                                                                                                                |                                                                                                                                                                                                |            |
| 3  | Background and rationale                                  | 6a  | Description of research question and justification for undertaking the trial, including summary of relevant studies (published and unpublished) examining benefits and harms for each intervention                                                                                                                                                                             | <u>4-6</u>                                                                                                                                                                                     |            |
| 4  |                                                           |     |                                                                                                                                                                                                                                                                                                                                                                                |                                                                                                                                                                                                |            |
| 5  |                                                           |     |                                                                                                                                                                                                                                                                                                                                                                                |                                                                                                                                                                                                |            |
| 6  |                                                           | 6b  | Explanation for choice of comparators                                                                                                                                                                                                                                                                                                                                          | <u>4-6</u>                                                                                                                                                                                     |            |
| 7  |                                                           |     |                                                                                                                                                                                                                                                                                                                                                                                |                                                                                                                                                                                                |            |
| 8  | Objectives                                                | 7   | Specific objectives or hypotheses                                                                                                                                                                                                                                                                                                                                              | <u>6</u>                                                                                                                                                                                       |            |
| 9  |                                                           |     |                                                                                                                                                                                                                                                                                                                                                                                |                                                                                                                                                                                                |            |
| 10 | Trial design                                              | 8   | Description of trial design including type of trial (eg, parallel group, crossover, factorial, single group), allocation ratio, and framework (eg, superiority, equivalence, noninferiority, exploratory)                                                                                                                                                                      | <u>6-7</u>                                                                                                                                                                                     |            |
| 11 |                                                           |     |                                                                                                                                                                                                                                                                                                                                                                                |                                                                                                                                                                                                |            |
| 12 |                                                           |     |                                                                                                                                                                                                                                                                                                                                                                                |                                                                                                                                                                                                |            |
| 13 |                                                           |     |                                                                                                                                                                                                                                                                                                                                                                                |                                                                                                                                                                                                |            |
| 14 | <b>Methods: Participants, interventions, and outcomes</b> |     |                                                                                                                                                                                                                                                                                                                                                                                |                                                                                                                                                                                                |            |
| 15 |                                                           |     |                                                                                                                                                                                                                                                                                                                                                                                |                                                                                                                                                                                                |            |
| 16 | Study setting                                             | 9   | Description of study settings (eg, community clinic, academic hospital) and list of countries where data will be collected. Reference to where list of study sites can be obtained                                                                                                                                                                                             | <u>6</u>                                                                                                                                                                                       |            |
| 17 |                                                           |     |                                                                                                                                                                                                                                                                                                                                                                                |                                                                                                                                                                                                |            |
| 18 |                                                           |     |                                                                                                                                                                                                                                                                                                                                                                                |                                                                                                                                                                                                |            |
| 19 | Eligibility criteria                                      | 10  | Inclusion and exclusion criteria for participants. If applicable, eligibility criteria for study centres and individuals who will perform the interventions (eg, surgeons, psychotherapists)                                                                                                                                                                                   | <u>7</u>                                                                                                                                                                                       |            |
| 20 |                                                           |     |                                                                                                                                                                                                                                                                                                                                                                                |                                                                                                                                                                                                |            |
| 21 |                                                           |     |                                                                                                                                                                                                                                                                                                                                                                                |                                                                                                                                                                                                |            |
| 22 | Interventions                                             | 11a | Interventions for each group with sufficient detail to allow replication, including how and when they will be administered                                                                                                                                                                                                                                                     | <u>8-9</u>                                                                                                                                                                                     |            |
| 23 |                                                           |     |                                                                                                                                                                                                                                                                                                                                                                                |                                                                                                                                                                                                |            |
| 24 |                                                           |     | 11b                                                                                                                                                                                                                                                                                                                                                                            | Criteria for discontinuing or modifying allocated interventions for a given trial participant (eg, drug dose change in response to harms, participant request, or improving/worsening disease) | <u>8-9</u> |
| 25 |                                                           |     |                                                                                                                                                                                                                                                                                                                                                                                |                                                                                                                                                                                                |            |
| 26 |                                                           |     |                                                                                                                                                                                                                                                                                                                                                                                |                                                                                                                                                                                                |            |
| 27 |                                                           | 11c | Strategies to improve adherence to intervention protocols, and any procedures for monitoring adherence (eg, drug tablet return, laboratory tests)                                                                                                                                                                                                                              | <u>8-9</u>                                                                                                                                                                                     |            |
| 28 |                                                           |     |                                                                                                                                                                                                                                                                                                                                                                                |                                                                                                                                                                                                |            |
| 29 |                                                           |     |                                                                                                                                                                                                                                                                                                                                                                                |                                                                                                                                                                                                |            |
| 30 |                                                           |     |                                                                                                                                                                                                                                                                                                                                                                                |                                                                                                                                                                                                |            |
| 31 |                                                           |     |                                                                                                                                                                                                                                                                                                                                                                                |                                                                                                                                                                                                |            |
| 32 | Outcomes                                                  | 11d | Relevant concomitant care and interventions that are permitted or prohibited during the trial                                                                                                                                                                                                                                                                                  | <u>9-11</u>                                                                                                                                                                                    |            |
| 33 |                                                           |     |                                                                                                                                                                                                                                                                                                                                                                                |                                                                                                                                                                                                |            |
| 34 |                                                           | 12  | Primary, secondary, and other outcomes, including the specific measurement variable (eg, systolic blood pressure), analysis metric (eg, change from baseline, final value, time to event), method of aggregation (eg, median, proportion), and time point for each outcome. Explanation of the clinical relevance of chosen efficacy and harm outcomes is strongly recommended | <u>11-12</u>                                                                                                                                                                                   |            |
| 35 |                                                           |     |                                                                                                                                                                                                                                                                                                                                                                                |                                                                                                                                                                                                |            |
| 36 |                                                           |     |                                                                                                                                                                                                                                                                                                                                                                                |                                                                                                                                                                                                |            |
| 37 | Participant timeline                                      | 13  | Time schedule of enrolment, interventions (including any run-ins and washouts), assessments, and visits for participants. A schematic diagram is highly recommended (see Figure)                                                                                                                                                                                               | <u>see Figure 2</u>                                                                                                                                                                            |            |
| 38 |                                                           |     |                                                                                                                                                                                                                                                                                                                                                                                |                                                                                                                                                                                                |            |
| 39 |                                                           |     |                                                                                                                                                                                                                                                                                                                                                                                |                                                                                                                                                                                                |            |
| 40 |                                                           |     |                                                                                                                                                                                                                                                                                                                                                                                |                                                                                                                                                                                                |            |
| 41 |                                                           |     |                                                                                                                                                                                                                                                                                                                                                                                |                                                                                                                                                                                                |            |
| 42 |                                                           |     |                                                                                                                                                                                                                                                                                                                                                                                |                                                                                                                                                                                                |            |
| 43 |                                                           |     |                                                                                                                                                                                                                                                                                                                                                                                |                                                                                                                                                                                                |            |
| 44 |                                                           |     |                                                                                                                                                                                                                                                                                                                                                                                |                                                                                                                                                                                                |            |
| 45 |                                                           |     |                                                                                                                                                                                                                                                                                                                                                                                |                                                                                                                                                                                                |            |
| 46 |                                                           |     |                                                                                                                                                                                                                                                                                                                                                                                |                                                                                                                                                                                                |            |

|   |             |    |                                                                                                                                                                                       |           |
|---|-------------|----|---------------------------------------------------------------------------------------------------------------------------------------------------------------------------------------|-----------|
| 1 | Sample size | 14 | Estimated number of participants needed to achieve study objectives and how it was determined, including clinical and statistical assumptions supporting any sample size calculations | <u>13</u> |
| 2 |             |    |                                                                                                                                                                                       |           |
| 3 |             |    |                                                                                                                                                                                       |           |
| 4 | Recruitment | 15 | Strategies for achieving adequate participant enrolment to reach target sample size                                                                                                   | <u>6</u>  |
| 5 |             |    |                                                                                                                                                                                       |           |

## 6 **Methods: Assignment of interventions (for controlled trials)**

### 7 Allocation:

|    |                                  |     |                                                                                                                                                                                                                                                                                                                                                          |          |
|----|----------------------------------|-----|----------------------------------------------------------------------------------------------------------------------------------------------------------------------------------------------------------------------------------------------------------------------------------------------------------------------------------------------------------|----------|
| 8  |                                  |     |                                                                                                                                                                                                                                                                                                                                                          |          |
| 9  |                                  |     |                                                                                                                                                                                                                                                                                                                                                          |          |
| 10 | Sequence generation              | 16a | Method of generating the allocation sequence (eg, computer-generated random numbers), and list of any factors for stratification. To reduce predictability of a random sequence, details of any planned restriction (eg, blocking) should be provided in a separate document that is unavailable to those who enrol participants or assign interventions | <u>7</u> |
| 11 |                                  |     |                                                                                                                                                                                                                                                                                                                                                          |          |
| 12 |                                  |     |                                                                                                                                                                                                                                                                                                                                                          |          |
| 13 |                                  |     |                                                                                                                                                                                                                                                                                                                                                          |          |
| 14 |                                  |     |                                                                                                                                                                                                                                                                                                                                                          |          |
| 15 |                                  |     |                                                                                                                                                                                                                                                                                                                                                          |          |
| 16 | Allocation concealment mechanism | 16b | Mechanism of implementing the allocation sequence (eg, central telephone; sequentially numbered, opaque, sealed envelopes), describing any steps to conceal the sequence until interventions are assigned                                                                                                                                                | <u>7</u> |
| 17 |                                  |     |                                                                                                                                                                                                                                                                                                                                                          |          |
| 18 |                                  |     |                                                                                                                                                                                                                                                                                                                                                          |          |
| 19 |                                  |     |                                                                                                                                                                                                                                                                                                                                                          |          |
| 20 | Implementation                   | 16c | Who will generate the allocation sequence, who will enrol participants, and who will assign participants to interventions                                                                                                                                                                                                                                | <u>7</u> |
| 21 |                                  |     |                                                                                                                                                                                                                                                                                                                                                          |          |
| 22 |                                  |     |                                                                                                                                                                                                                                                                                                                                                          |          |
| 23 |                                  |     |                                                                                                                                                                                                                                                                                                                                                          |          |
| 24 | Blinding (masking)               | 17a | Who will be blinded after assignment to interventions (eg, trial participants, care providers, outcome assessors, data analysts), and how                                                                                                                                                                                                                | <u>7</u> |
| 25 |                                  |     |                                                                                                                                                                                                                                                                                                                                                          |          |
| 26 |                                  |     |                                                                                                                                                                                                                                                                                                                                                          |          |
| 27 |                                  |     |                                                                                                                                                                                                                                                                                                                                                          |          |
| 28 |                                  | 17b | If blinded, circumstances under which unblinding is permissible, and procedure for revealing a participant's allocated intervention during the trial                                                                                                                                                                                                     | <u>7</u> |
| 29 |                                  |     |                                                                                                                                                                                                                                                                                                                                                          |          |
| 30 |                                  |     |                                                                                                                                                                                                                                                                                                                                                          |          |

## 31 **Methods: Data collection, management, and analysis**

|    |                         |     |                                                                                                                                                                                                                                                                                                                                                                                                              |                    |
|----|-------------------------|-----|--------------------------------------------------------------------------------------------------------------------------------------------------------------------------------------------------------------------------------------------------------------------------------------------------------------------------------------------------------------------------------------------------------------|--------------------|
| 32 |                         |     |                                                                                                                                                                                                                                                                                                                                                                                                              |                    |
| 33 |                         |     |                                                                                                                                                                                                                                                                                                                                                                                                              |                    |
| 34 | Data collection methods | 18a | Plans for assessment and collection of outcome, baseline, and other trial data, including any related processes to promote data quality (eg, duplicate measurements, training of assessors) and a description of study instruments (eg, questionnaires, laboratory tests) along with their reliability and validity, if known. Reference to where data collection forms can be found, if not in the protocol | <u>8 &amp; 12</u>  |
| 35 |                         |     |                                                                                                                                                                                                                                                                                                                                                                                                              |                    |
| 36 |                         |     |                                                                                                                                                                                                                                                                                                                                                                                                              |                    |
| 37 |                         |     |                                                                                                                                                                                                                                                                                                                                                                                                              |                    |
| 38 |                         |     |                                                                                                                                                                                                                                                                                                                                                                                                              |                    |
| 39 |                         | 18b | Plans to promote participant retention and complete follow-up, including list of any outcome data to be collected for participants who discontinue or deviate from intervention protocols                                                                                                                                                                                                                    | <u>11 &amp; 12</u> |
| 40 |                         |     |                                                                                                                                                                                                                                                                                                                                                                                                              |                    |
| 41 |                         |     |                                                                                                                                                                                                                                                                                                                                                                                                              |                    |
| 42 |                         |     |                                                                                                                                                                                                                                                                                                                                                                                                              |                    |

|    |                                 |     |                                                                                                                                                                                                                                                                                                                                       |                           |
|----|---------------------------------|-----|---------------------------------------------------------------------------------------------------------------------------------------------------------------------------------------------------------------------------------------------------------------------------------------------------------------------------------------|---------------------------|
| 1  | Data management                 | 19  | Plans for data entry, coding, security, and storage, including any related processes to promote data quality (eg, double data entry; range checks for data values). Reference to where details of data management procedures can be found, if not in the protocol                                                                     | <u>Not Applicable</u>     |
| 2  |                                 |     |                                                                                                                                                                                                                                                                                                                                       |                           |
| 3  |                                 |     |                                                                                                                                                                                                                                                                                                                                       |                           |
| 4  |                                 |     |                                                                                                                                                                                                                                                                                                                                       |                           |
| 5  | Statistical methods             | 20a | Statistical methods for analysing primary and secondary outcomes. Reference to where other details of the statistical analysis plan can be found, if not in the protocol                                                                                                                                                              | <u>14</u>                 |
| 6  |                                 |     |                                                                                                                                                                                                                                                                                                                                       |                           |
| 7  |                                 |     |                                                                                                                                                                                                                                                                                                                                       |                           |
| 8  |                                 | 20b | Methods for any additional analyses (eg, subgroup and adjusted analyses)                                                                                                                                                                                                                                                              | <u>14</u>                 |
| 9  |                                 |     |                                                                                                                                                                                                                                                                                                                                       |                           |
| 10 |                                 | 20c | Definition of analysis population relating to protocol non-adherence (eg, as randomised analysis), and any statistical methods to handle missing data (eg, multiple imputation)                                                                                                                                                       | <u>14</u>                 |
| 11 |                                 |     |                                                                                                                                                                                                                                                                                                                                       |                           |
| 12 |                                 |     |                                                                                                                                                                                                                                                                                                                                       |                           |
| 13 |                                 |     |                                                                                                                                                                                                                                                                                                                                       |                           |
| 14 | <b>Methods: Monitoring</b>      |     |                                                                                                                                                                                                                                                                                                                                       |                           |
| 15 |                                 |     |                                                                                                                                                                                                                                                                                                                                       |                           |
| 16 | Data monitoring                 | 21a | Composition of data monitoring committee (DMC); summary of its role and reporting structure; statement of whether it is independent from the sponsor and competing interests; and reference to where further details about its charter can be found, if not in the protocol. Alternatively, an explanation of why a DMC is not needed | <u>Not Applicable</u>     |
| 17 |                                 |     |                                                                                                                                                                                                                                                                                                                                       |                           |
| 18 |                                 |     |                                                                                                                                                                                                                                                                                                                                       |                           |
| 19 |                                 |     |                                                                                                                                                                                                                                                                                                                                       |                           |
| 20 |                                 |     |                                                                                                                                                                                                                                                                                                                                       |                           |
| 21 |                                 |     |                                                                                                                                                                                                                                                                                                                                       |                           |
| 22 |                                 | 21b | Description of any interim analyses and stopping guidelines, including who will have access to these interim results and make the final decision to terminate the trial                                                                                                                                                               | <u>Not Applicable</u>     |
| 23 |                                 |     |                                                                                                                                                                                                                                                                                                                                       |                           |
| 24 |                                 |     |                                                                                                                                                                                                                                                                                                                                       |                           |
| 25 | Harms                           | 22  | Plans for collecting, assessing, reporting, and managing solicited and spontaneously reported adverse events and other unintended effects of trial interventions or trial conduct                                                                                                                                                     | <u>14</u>                 |
| 26 |                                 |     |                                                                                                                                                                                                                                                                                                                                       |                           |
| 27 |                                 |     |                                                                                                                                                                                                                                                                                                                                       |                           |
| 28 | Auditing                        | 23  | Frequency and procedures for auditing trial conduct, if any, and whether the process will be independent from investigators and the sponsor                                                                                                                                                                                           | <u>Not Applicable</u>     |
| 29 |                                 |     |                                                                                                                                                                                                                                                                                                                                       |                           |
| 30 |                                 |     |                                                                                                                                                                                                                                                                                                                                       |                           |
| 31 |                                 |     |                                                                                                                                                                                                                                                                                                                                       |                           |
| 32 | <b>Ethics and dissemination</b> |     |                                                                                                                                                                                                                                                                                                                                       |                           |
| 33 |                                 |     |                                                                                                                                                                                                                                                                                                                                       |                           |
| 34 | Research ethics approval        | 24  | Plans for seeking research ethics committee/institutional review board (REC/IRB) approval                                                                                                                                                                                                                                             | <u>2 &amp; 6 &amp; 18</u> |
| 35 |                                 |     |                                                                                                                                                                                                                                                                                                                                       |                           |
| 36 |                                 |     |                                                                                                                                                                                                                                                                                                                                       |                           |
| 37 | Protocol amendments             | 25  | Plans for communicating important protocol modifications (eg, changes to eligibility criteria, outcomes, analyses) to relevant parties (eg, investigators, REC/IRBs, trial participants, trial registries, journals, regulators)                                                                                                      | <u>15</u>                 |
| 38 |                                 |     |                                                                                                                                                                                                                                                                                                                                       |                           |
| 39 |                                 |     |                                                                                                                                                                                                                                                                                                                                       |                           |
| 40 |                                 |     |                                                                                                                                                                                                                                                                                                                                       |                           |
| 41 |                                 |     |                                                                                                                                                                                                                                                                                                                                       |                           |
| 42 |                                 |     |                                                                                                                                                                                                                                                                                                                                       |                           |
| 43 |                                 |     |                                                                                                                                                                                                                                                                                                                                       |                           |
| 44 |                                 |     |                                                                                                                                                                                                                                                                                                                                       |                           |
| 45 |                                 |     |                                                                                                                                                                                                                                                                                                                                       |                           |
| 46 |                                 |     |                                                                                                                                                                                                                                                                                                                                       |                           |

|    |                               |     |                                                                                                                                                                                                                                                                                     |                               |
|----|-------------------------------|-----|-------------------------------------------------------------------------------------------------------------------------------------------------------------------------------------------------------------------------------------------------------------------------------------|-------------------------------|
| 1  | Consent or assent             | 26a | Who will obtain informed consent or assent from potential trial participants or authorised surrogates, and how (see Item 32)                                                                                                                                                        | <u>6</u>                      |
| 2  |                               |     |                                                                                                                                                                                                                                                                                     |                               |
| 3  |                               |     |                                                                                                                                                                                                                                                                                     |                               |
| 4  |                               | 26b | Additional consent provisions for collection and use of participant data and biological specimens in ancillary studies, if applicable                                                                                                                                               | <u>Not Applicable</u>         |
| 5  |                               |     |                                                                                                                                                                                                                                                                                     |                               |
| 6  |                               |     |                                                                                                                                                                                                                                                                                     |                               |
| 7  | Confidentiality               | 27  | How personal information about potential and enrolled participants will be collected, shared, and maintained in order to protect confidentiality before, during, and after the trial                                                                                                | <u>8</u>                      |
| 8  |                               |     |                                                                                                                                                                                                                                                                                     |                               |
| 9  |                               |     |                                                                                                                                                                                                                                                                                     |                               |
| 10 | Declaration of interests      | 28  | Financial and other competing interests for principal investigators for the overall trial and each study site                                                                                                                                                                       | <u>18</u>                     |
| 11 |                               |     |                                                                                                                                                                                                                                                                                     |                               |
| 12 |                               |     |                                                                                                                                                                                                                                                                                     |                               |
| 13 | Access to data                | 29  | Statement of who will have access to the final trial dataset, and disclosure of contractual agreements that limit such access for investigators                                                                                                                                     | <u>18</u>                     |
| 14 |                               |     |                                                                                                                                                                                                                                                                                     |                               |
| 15 |                               |     |                                                                                                                                                                                                                                                                                     |                               |
| 16 | Ancillary and post-trial care | 30  | Provisions, if any, for ancillary and post-trial care, and for compensation to those who suffer harm from trial participation                                                                                                                                                       | <u>in consent form</u>        |
| 17 |                               |     |                                                                                                                                                                                                                                                                                     |                               |
| 18 |                               |     |                                                                                                                                                                                                                                                                                     |                               |
| 19 |                               |     |                                                                                                                                                                                                                                                                                     |                               |
| 20 | Dissemination policy          | 31a | Plans for investigators and sponsor to communicate trial results to participants, healthcare professionals, the public, and other relevant groups (eg, via publication, reporting in results databases, or other data sharing arrangements), including any publication restrictions | <u>2</u>                      |
| 21 |                               |     |                                                                                                                                                                                                                                                                                     |                               |
| 22 |                               |     |                                                                                                                                                                                                                                                                                     |                               |
| 23 |                               |     |                                                                                                                                                                                                                                                                                     |                               |
| 24 |                               | 31b | Authorship eligibility guidelines and any intended use of professional writers                                                                                                                                                                                                      | <u>Not Applicable</u>         |
| 25 |                               |     |                                                                                                                                                                                                                                                                                     |                               |
| 26 |                               | 31c | Plans, if any, for granting public access to the full protocol, participant-level dataset, and statistical code                                                                                                                                                                     | <u>Not Applicable</u>         |
| 27 |                               |     |                                                                                                                                                                                                                                                                                     |                               |
| 28 |                               |     |                                                                                                                                                                                                                                                                                     |                               |
| 29 | <b>Appendices</b>             |     |                                                                                                                                                                                                                                                                                     |                               |
| 30 |                               |     |                                                                                                                                                                                                                                                                                     |                               |
| 31 | Informed consent materials    | 32  | Model consent form and other related documentation given to participants and authorised surrogates                                                                                                                                                                                  | <u>has been proved by IRB</u> |
| 32 |                               |     |                                                                                                                                                                                                                                                                                     |                               |
| 33 |                               |     |                                                                                                                                                                                                                                                                                     |                               |
| 34 | Biological specimens          | 33  | Plans for collection, laboratory evaluation, and storage of biological specimens for genetic or molecular analysis in the current trial and for future use in ancillary studies, if applicable                                                                                      | <u>Not Applicable</u>         |
| 35 |                               |     |                                                                                                                                                                                                                                                                                     |                               |
| 36 |                               |     |                                                                                                                                                                                                                                                                                     |                               |

\*It is strongly recommended that this checklist be read in conjunction with the SPIRIT 2013 Explanation & Elaboration for important clarification on the items. Amendments to the protocol should be tracked and dated. The SPIRIT checklist is copyrighted by the SPIRIT Group under the Creative Commons "[Attribution-NonCommercial-NoDerivs 3.0 Unported](https://creativecommons.org/licenses/by-nc-nd/3.0/)" license.
